# Supplementary material
Source: publisher figshare collection journal article supplement (https://brill.figshare.com/articles/dataset/_/25222046)
Supplement: Supplementary file 1 [file 1]

Supplementary online material of Insect Systematics & Evolution  
DOI: <https://doi.org/10.1163/1876312X-bja10055>

**Holarctic Lineages Cannot Inform Diversity and Evolution in the Neotropics – the barklice family Psocidae as a case study**

*Valentina Sarria-Rodríguez, Ranulfo Gonzalez-Obando, Nelson Rivera-Franco, Heiber Cardenas-Henao and Cristian Román-Palacios*

**APPENDIX E1**

In this document:

Figures E1 – E29

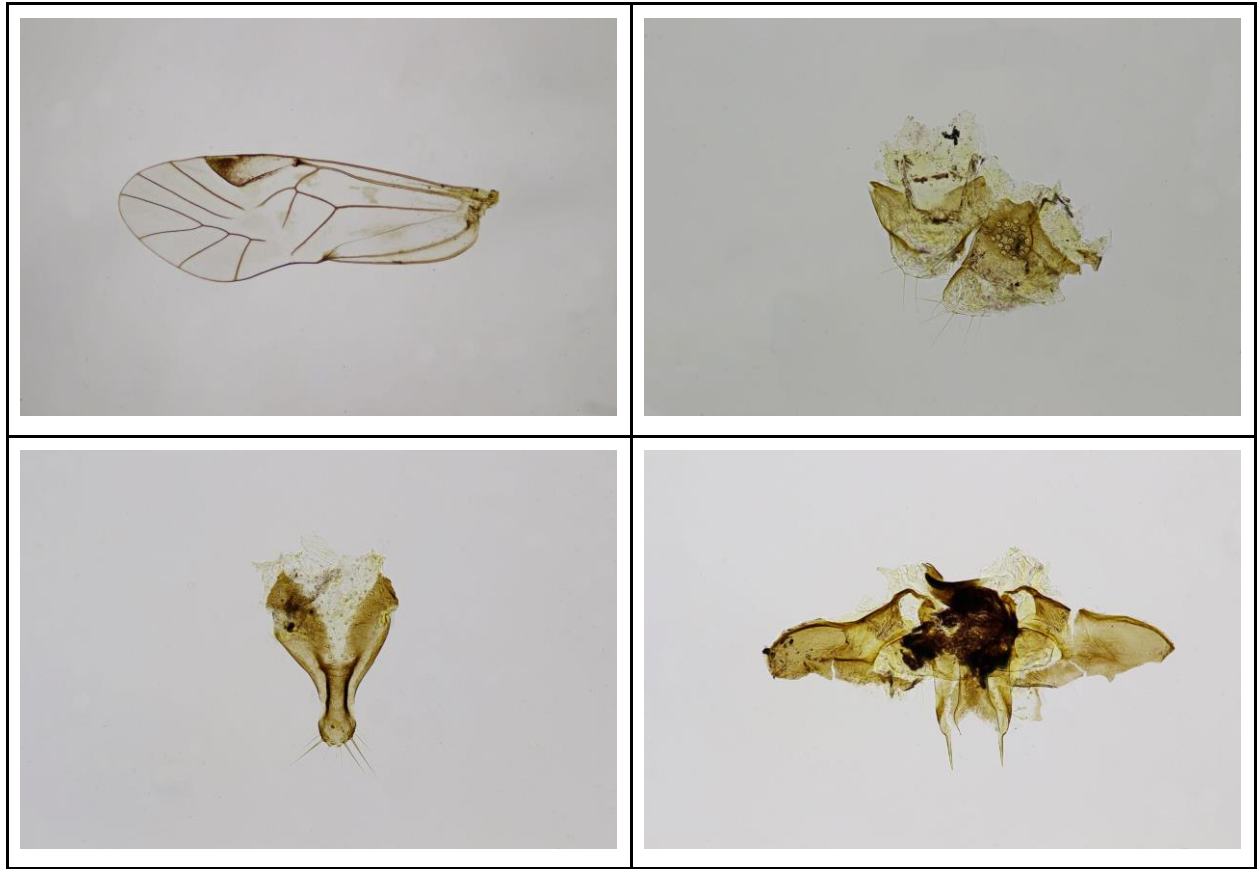

**Figure E1.** Plate depicting major morphological traits (forewing [top left], para-epiproct [top-right], hypandrium/subgenital plate [bottom left], gonapophyses/related structures [bottom right]) for *Amphigerontiinae* (code: sp 12). Note that these structures were the only features preserved before processing the individual for molecular analyses.

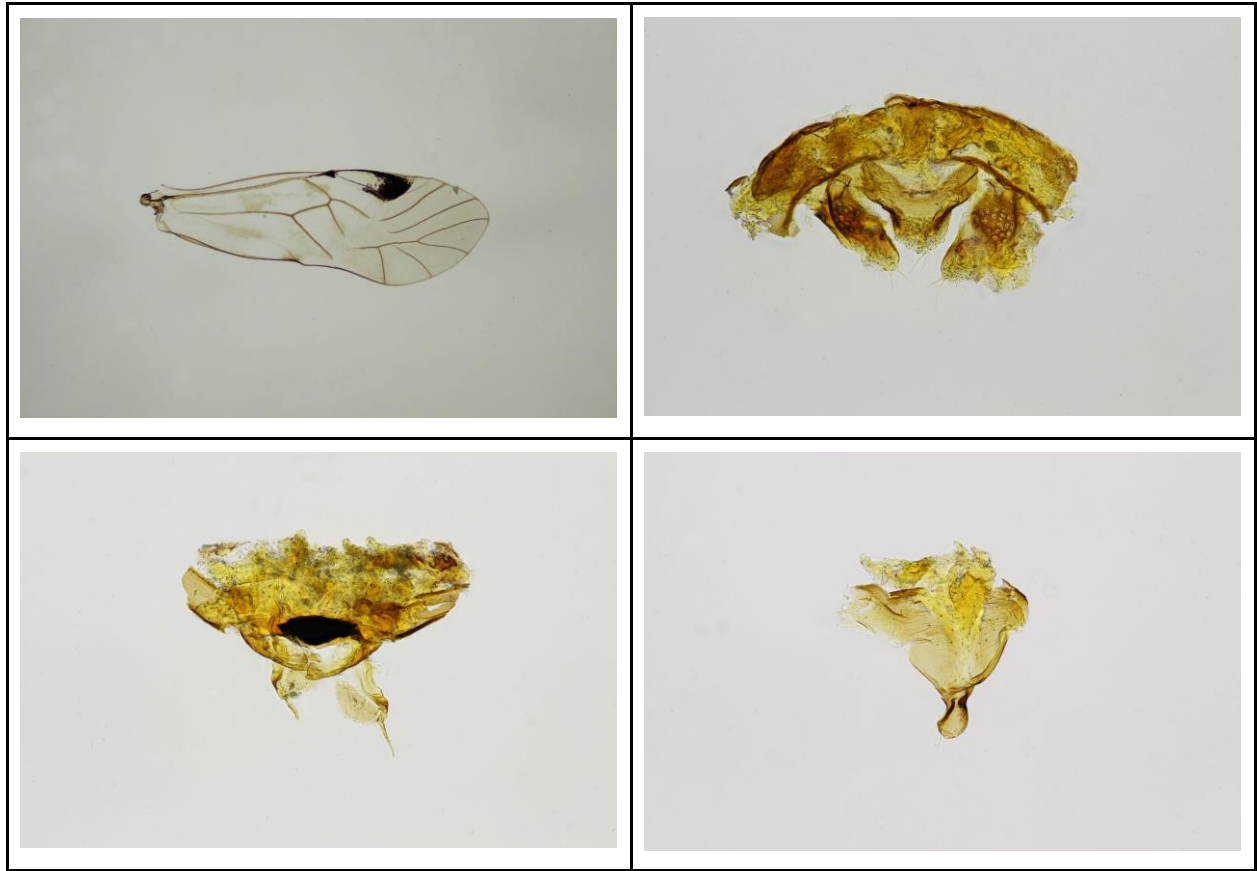

**Figure E2.** Plate depicting major morphological traits (forewing [top left], para-epiproct [top-right], hypandrium/subgenital plate [bottom left], gonapophyses/related structures [bottom right]) for *Amphigerontiinae* (code: sp 13). Note that these structures were the only features preserved before processing the individual for molecular analyses.

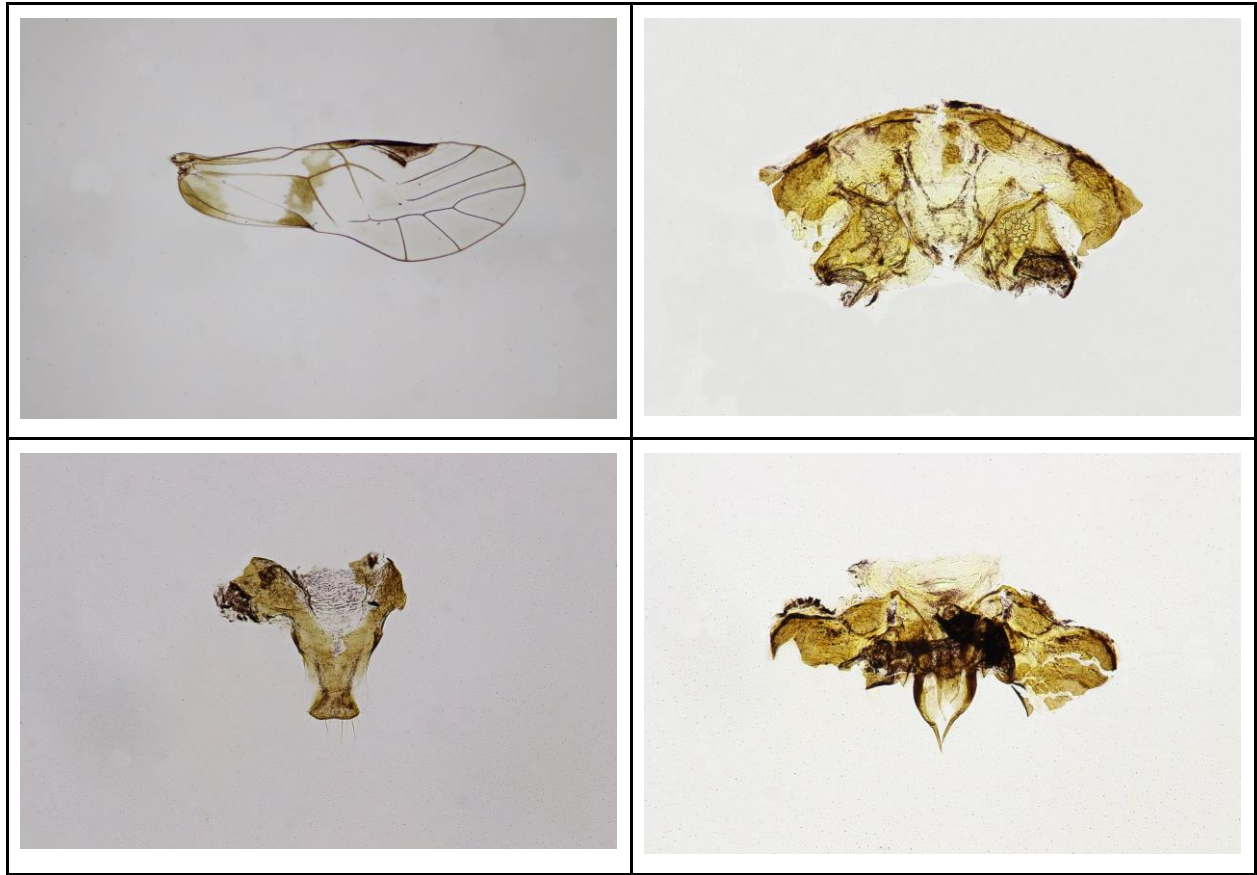

**Figure E3.** Plate depicting major morphological traits (forewing [top left], para-epiproct [top-right], hypandrium/subgenital plate [bottom left], gonapophyses/related structures [bottom right]) for *Atrichadenotecnum* (code: sp 11). Note that these structures were the only features preserved before processing the individual for molecular analyses.

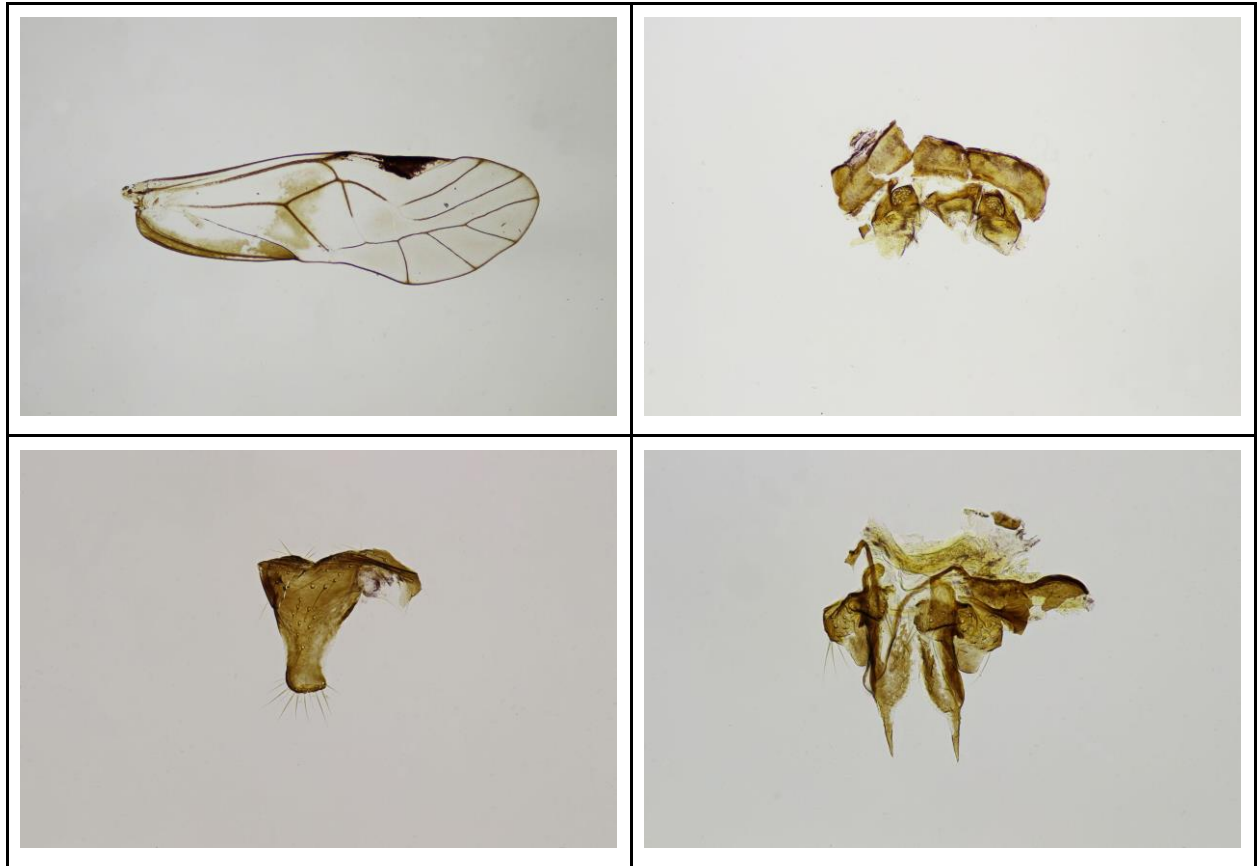

**Figure E4.** Plate depicting major morphological traits (forewing [top left], para-epiproct [top-right], hypandrium/subgenital plate [bottom left], gonapophyses/related structures [bottom right]) for *Atrichadenotecnum* (code: sp 30). Note that these structures were the only features preserved before processing the individual for molecular analyses.

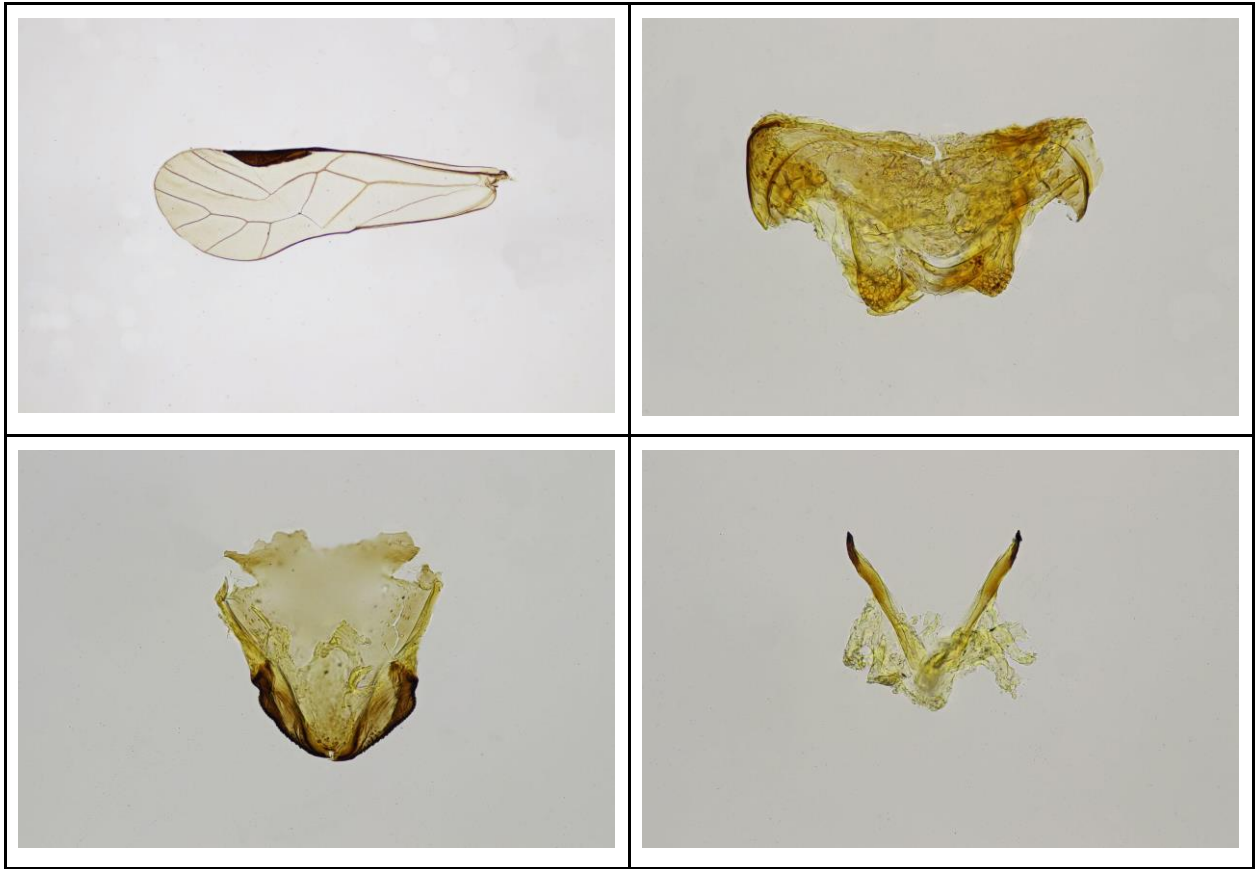

**Figure E5.** Plate depicting major morphological traits (forewing [top left], para-epiproct [top-right], hypandrium/subgenital plate [bottom left], gonapophyses/related structures [bottom right]) for *Blaste* (code: sp 19). Note that these structures were the only features preserved before processing the individual for molecular analyses.

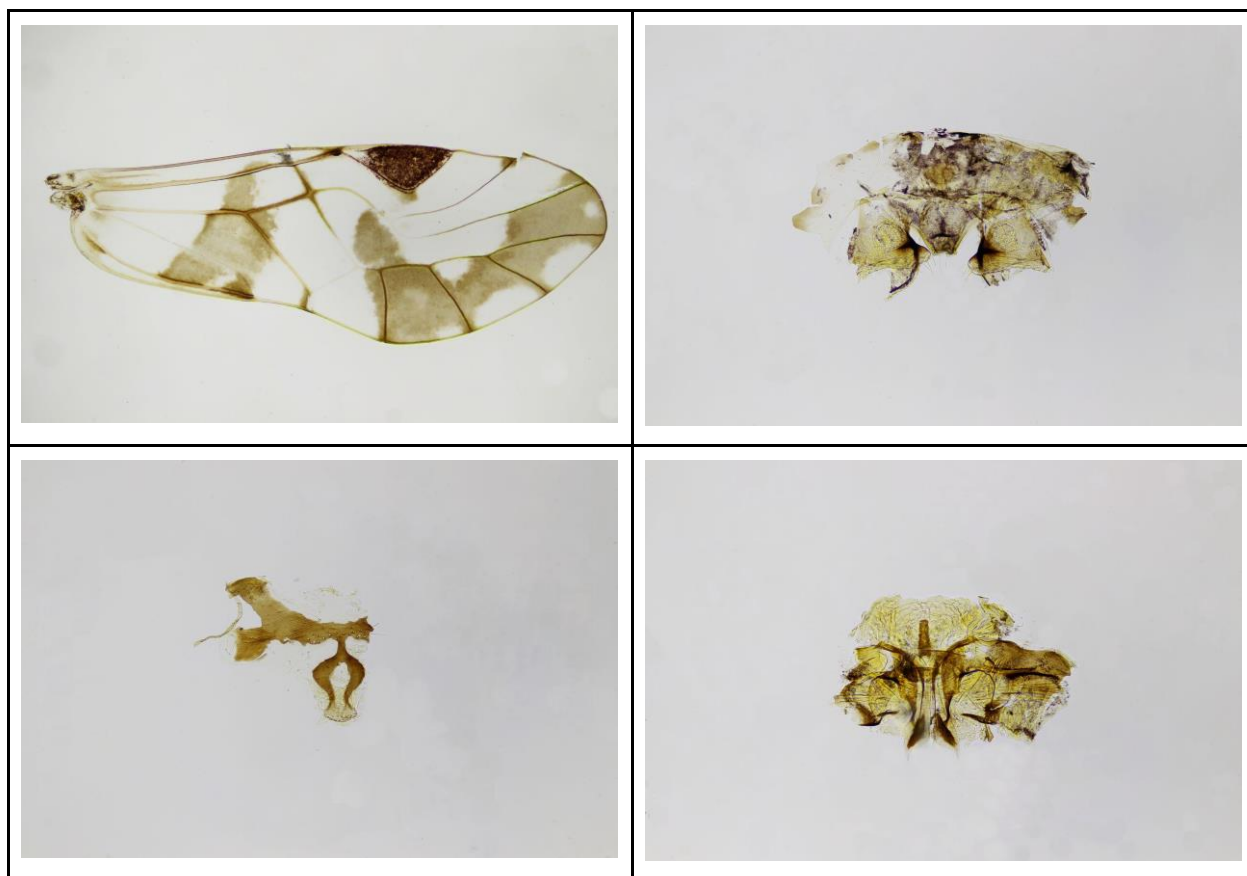

**Figure E6.** Plate depicting major morphological traits (forewing [top left], para-epiproct [top-right], hypandrium/subgenital plate [bottom left], gonapophyses/related structures [bottom right]) for *Cerastipsocus* (code: sp 03). Note that these structures were the only features preserved before processing the individual for molecular analyses.

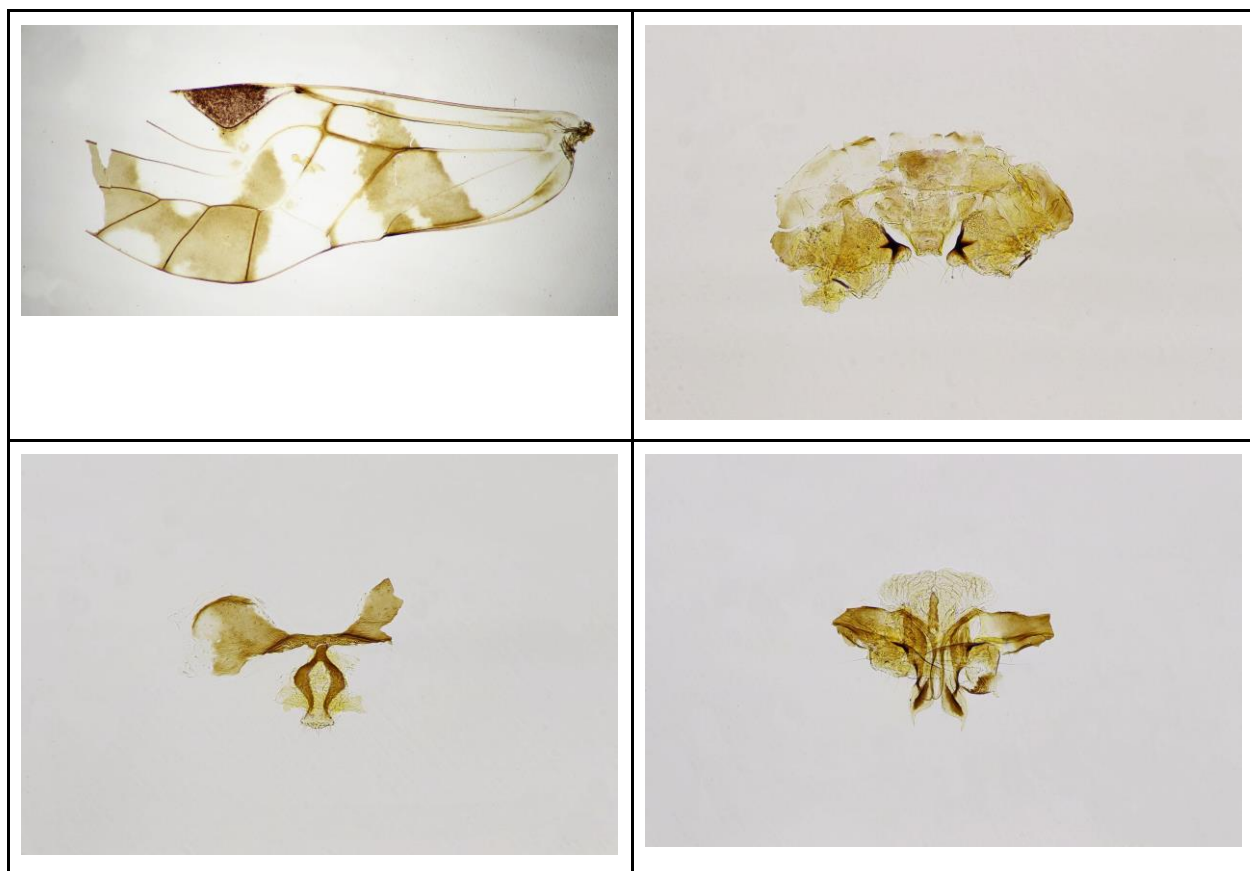

**Figure E7.** Plate depicting major morphological traits (forewing [top left], para-epiproct [top-right], hypandrium/subgenital plate [bottom left], gonapophyses/related structures [bottom right]) for *Cerastipsocus* (code: sp 05). Note that these structures were the only features preserved before processing the individual for molecular analyses.



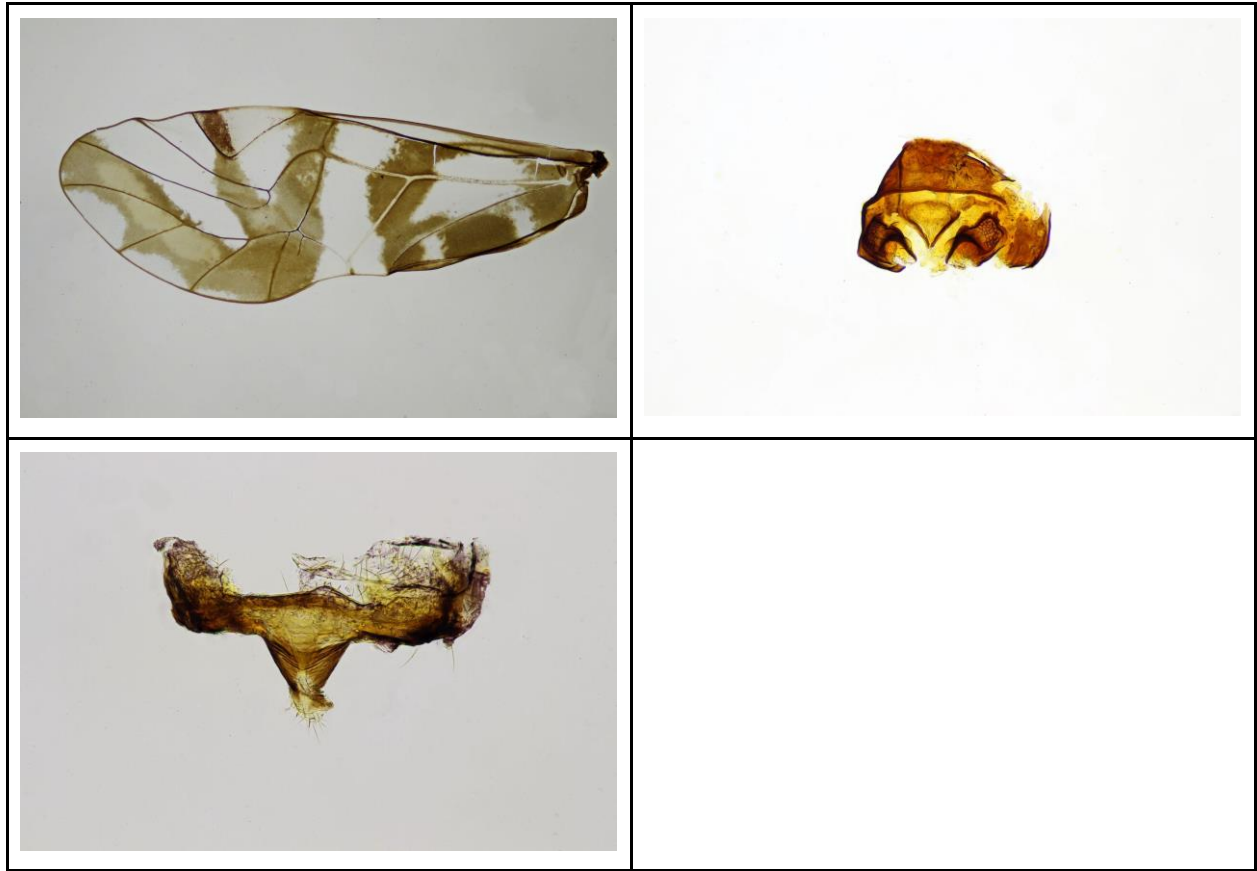

**Figure E8.** Plate depicting major morphological traits (forewing [top left], para-epiproct [top-right], hypandrium/subgenital plate [bottom left], gonapophyses/related structures [bottom right]) for *Cerastipsocus* (code: sp 10). Note that these structures were the only features preserved before processing the individual for molecular analyses.

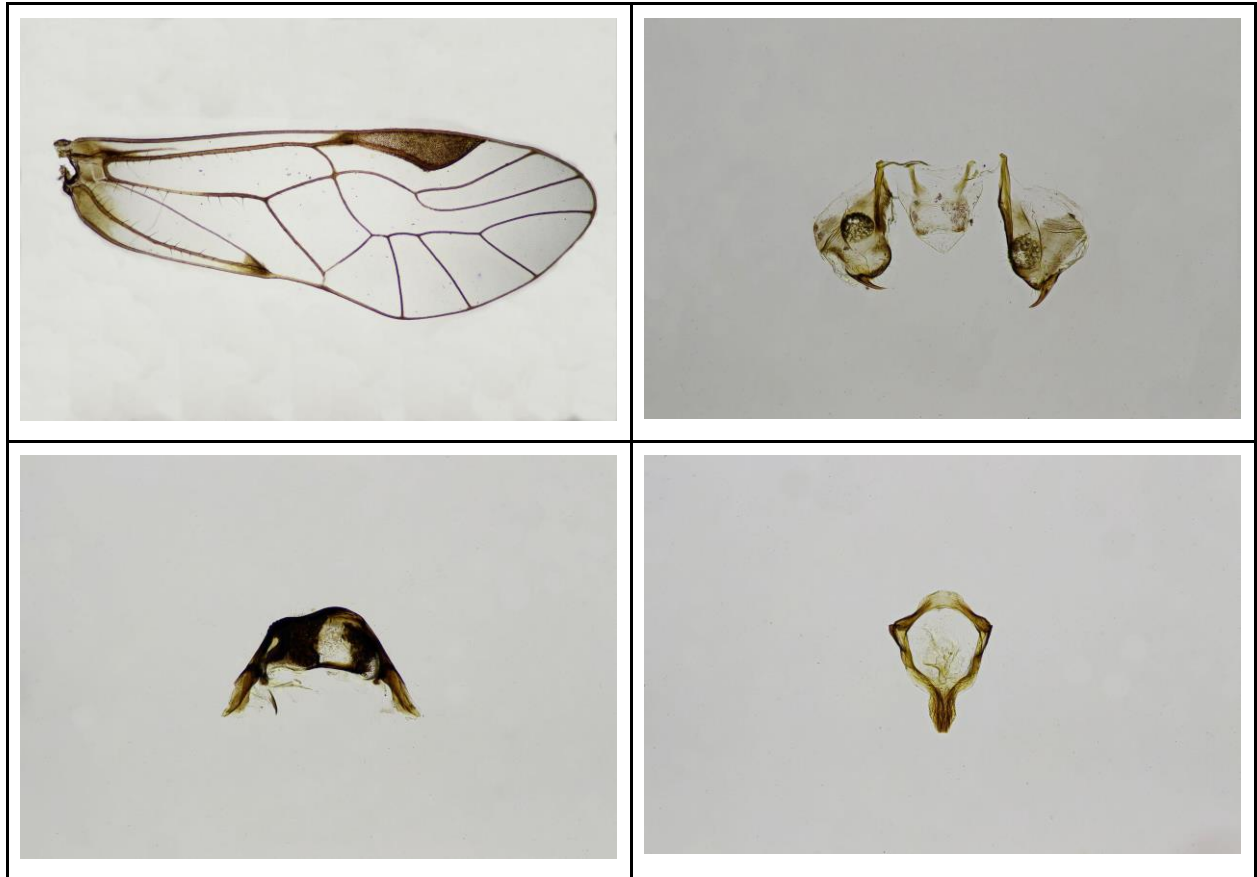

**Figure E9.** Plate depicting major morphological traits (forewing [top left], para-epiproct [top-right], hypandrium/subgenital plate [bottom left], gonapophyses/related structures [bottom right]) for *Chaetoblaste* (code: sp 44). Note that these structures were the only features preserved before processing the individual for molecular analyses.

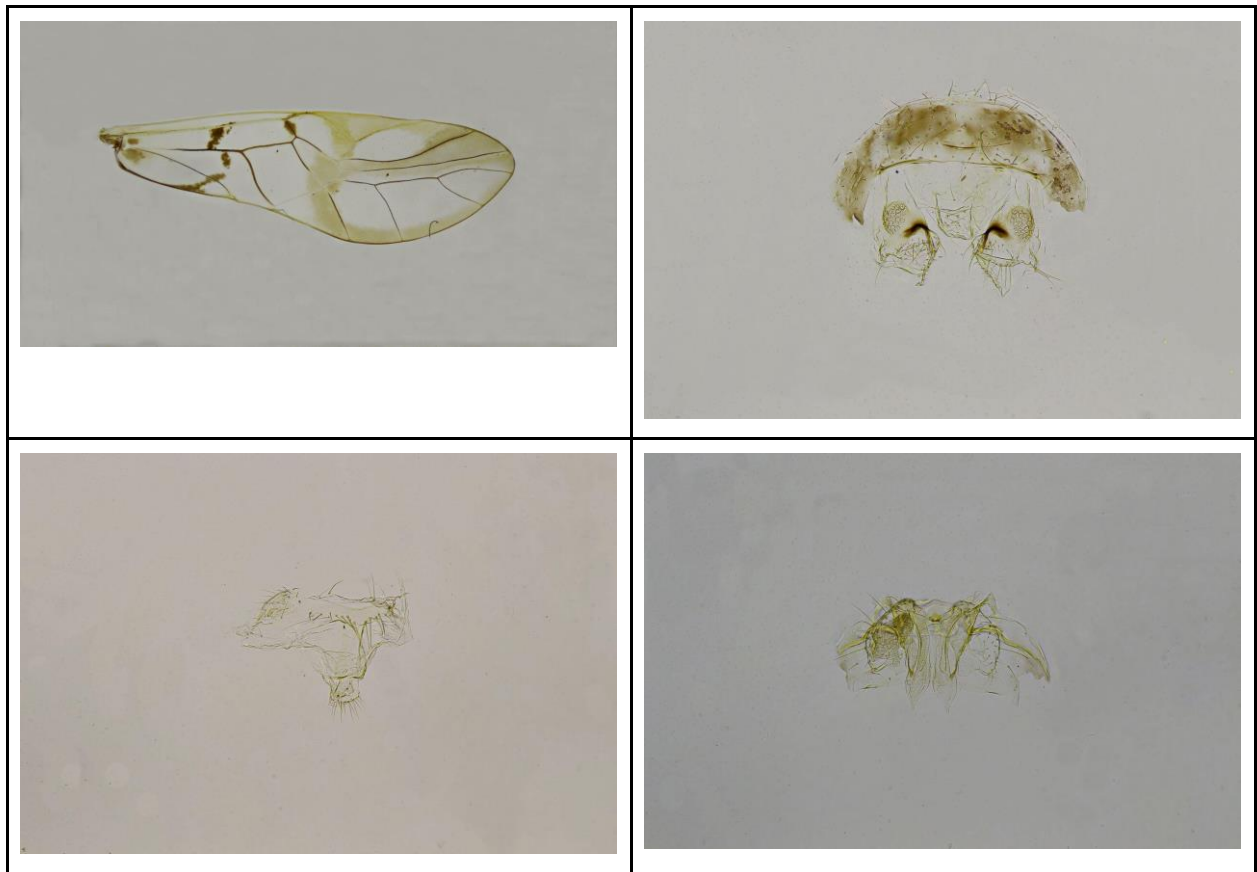

**Figure E10.** Plate depicting major morphological traits (forewing [top left], para-epiproct [top-right], hypandrium/subgenital plate [bottom left], gonapophyses/related structures [bottom right]) for *Dactylopsocus* (code: sp 37). Note that these structures were the only features preserved before processing the individual for molecular analyses.

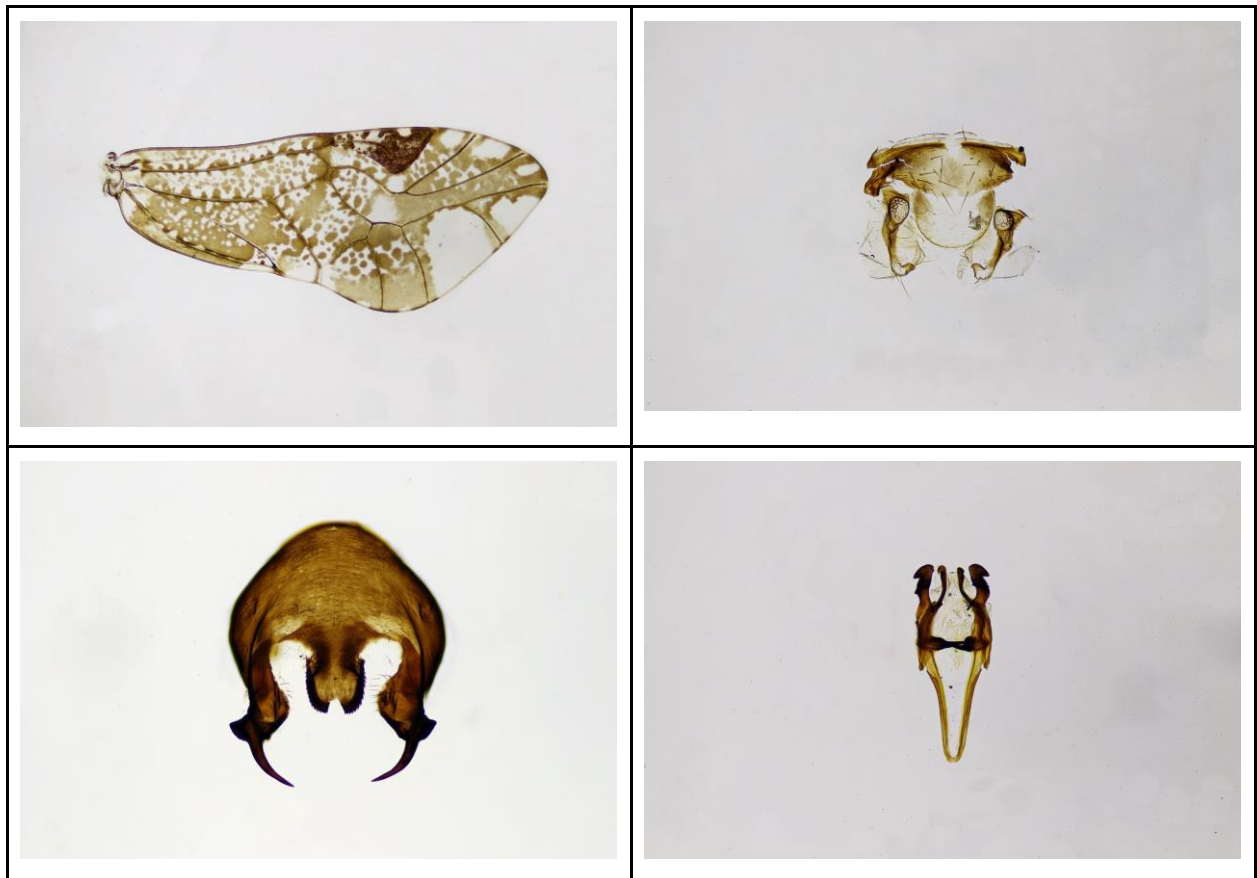

**Figure E11.** Plate depicting major morphological traits (forewing [top left], para-epiproct [top-right], hypandrium/subgenital plate [bottom left], gonapophyses/related structures [bottom right]) for *Elaphopsocoides* (code: sp 45). Note that these structures were the only features preserved before processing the individual for molecular analyses.

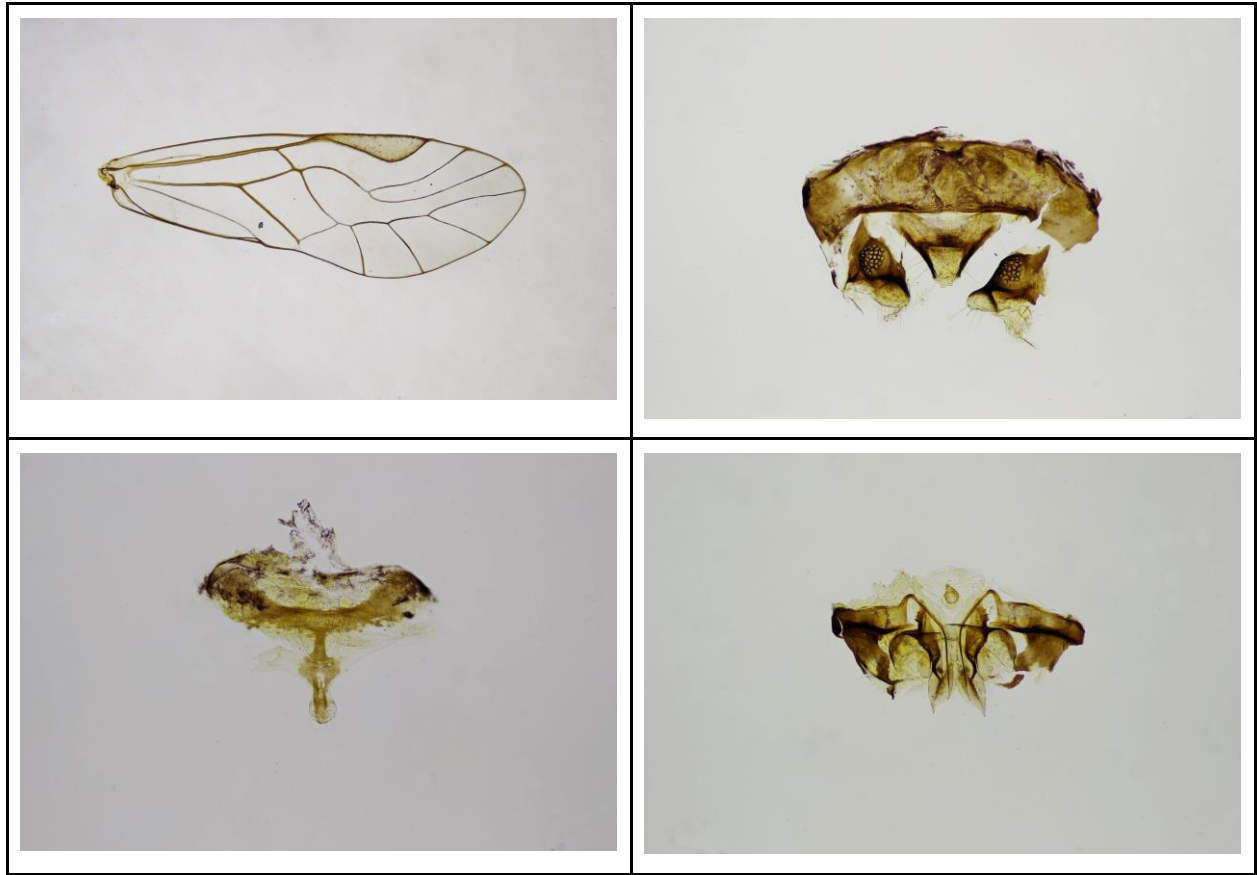

**Figure E12.** Plate depicting major morphological traits (forewing [top left], para-epiproct [top-right], hypandrium/subgenital plate [bottom left], gonapophyses/related structures [bottom right]) for *Metylophorus* (code: sp 34). Note that these structures were the only features preserved before processing the individual for molecular analyses.

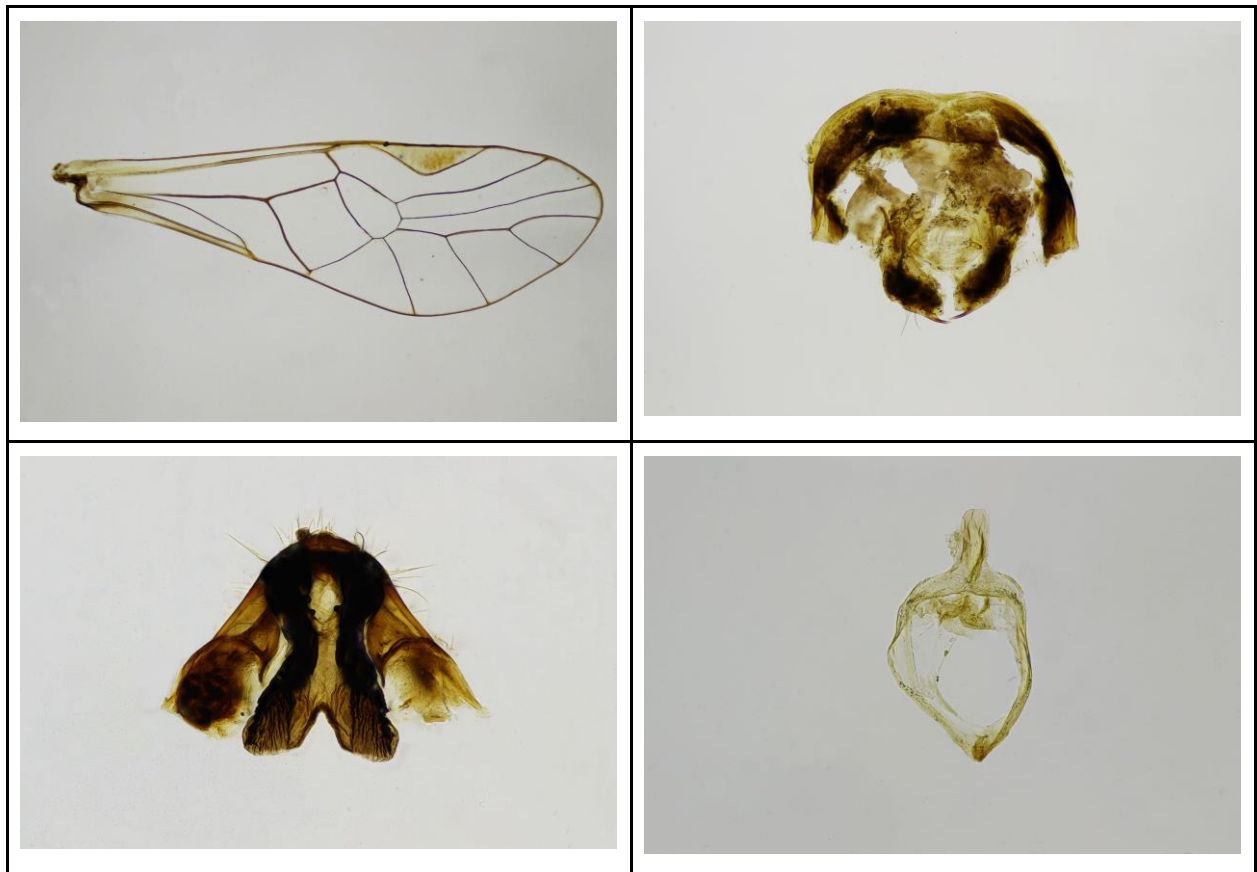

**Figure E13.** Plate depicting major morphological traits (forewing [top left], para-epiproct [top-right], hypandrium/subgenital plate [bottom left], gonapophyses/related structures [bottom right]) for Psocidae (code: sp 25). Note that these structures were the only features preserved before processing the individual for molecular analyses.

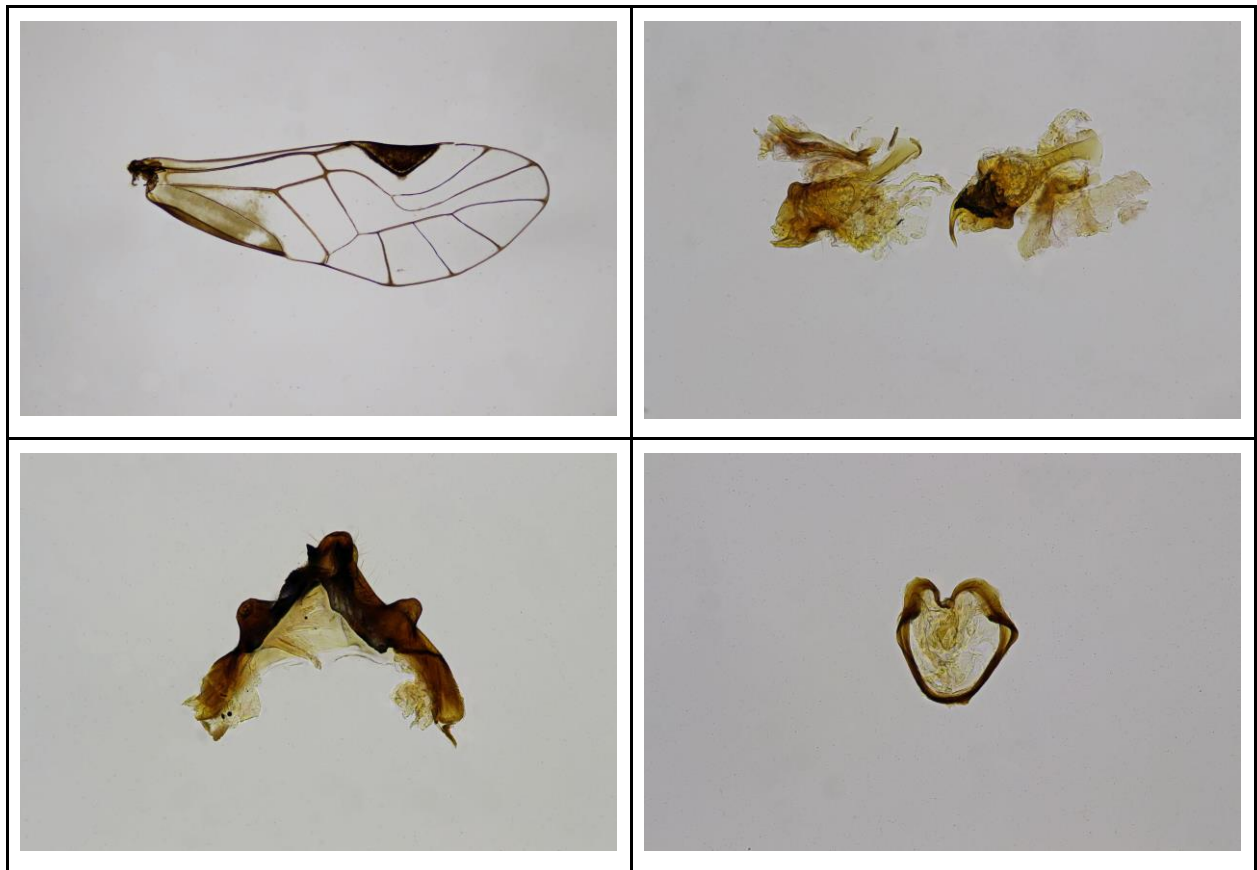

**Figure E14.** Plate depicting major morphological traits (forewing [top left], para-epiproct [top-right], hypandrium/subgenital plate [bottom left], gonapophyses/related structures [bottom right]) for *Psococerastis* (code: sp 09). Note that these structures were the only features preserved before processing the individual for molecular analyses.

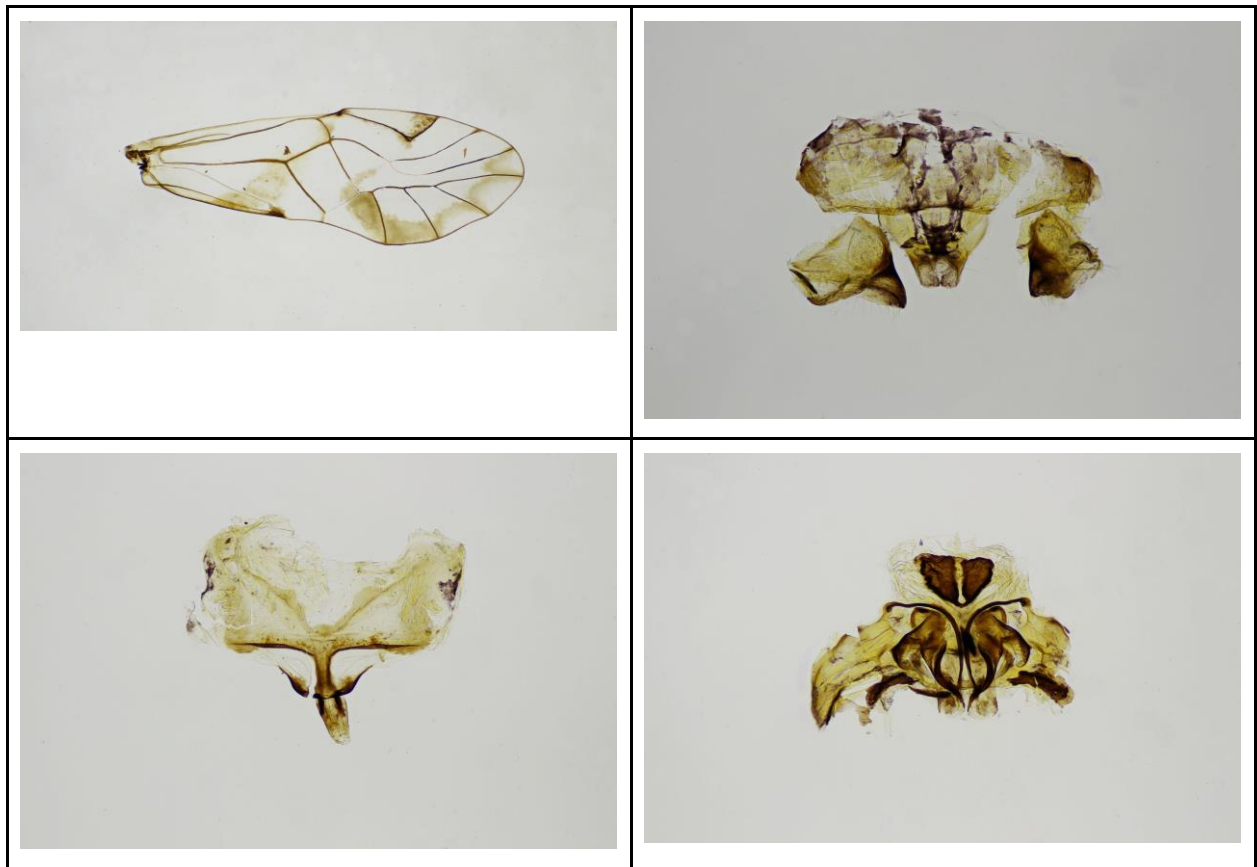

**Figure E15.** Plate depicting major morphological traits (forewing [top left], para-epiproct [top-right], hypandrium/subgenital plate [bottom left], gonapophyses/related structures [bottom right]) for *Psococerastis* (code: sp 39). Note that these structures were the only features preserved before processing the individual for molecular analyses.



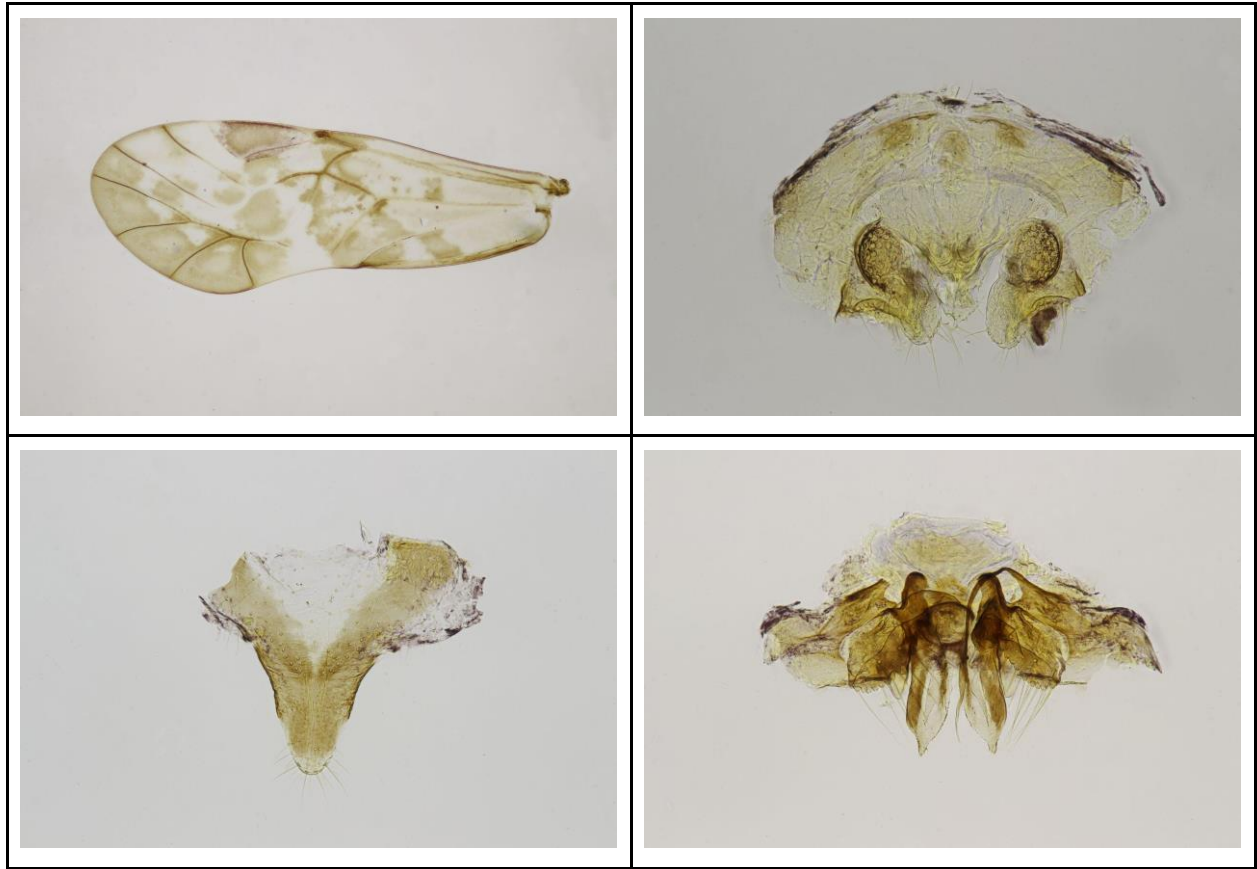

**Figure E16.** Plate depicting major morphological traits (forewing [top left], para-epiproct [top-right], hypandrium/subgenital plate [bottom left], gonapophyses/related structures [bottom right]) for *Psocus* (code: sp 32). Note that these structures were the only features preserved before processing the individual for molecular analyses.

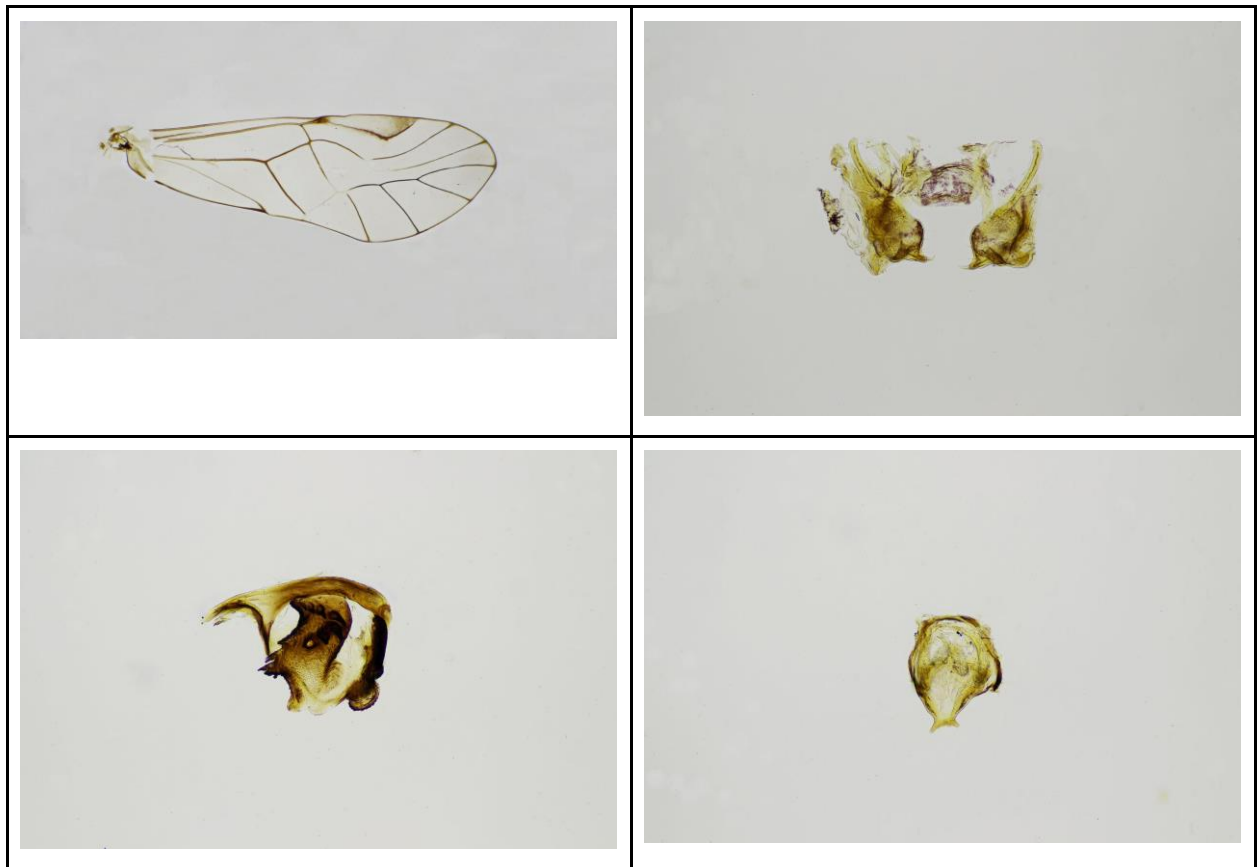

**Figure E17.** Plate depicting major morphological traits (forewing [top left], para-epiproct [top-right], hypandrium/subgenital plate [bottom left], gonapophyses/related structures [bottom right]) for *Ptycta* (code: sp 38). Note that these structures were the only features preserved before processing the individual for molecular analyses.

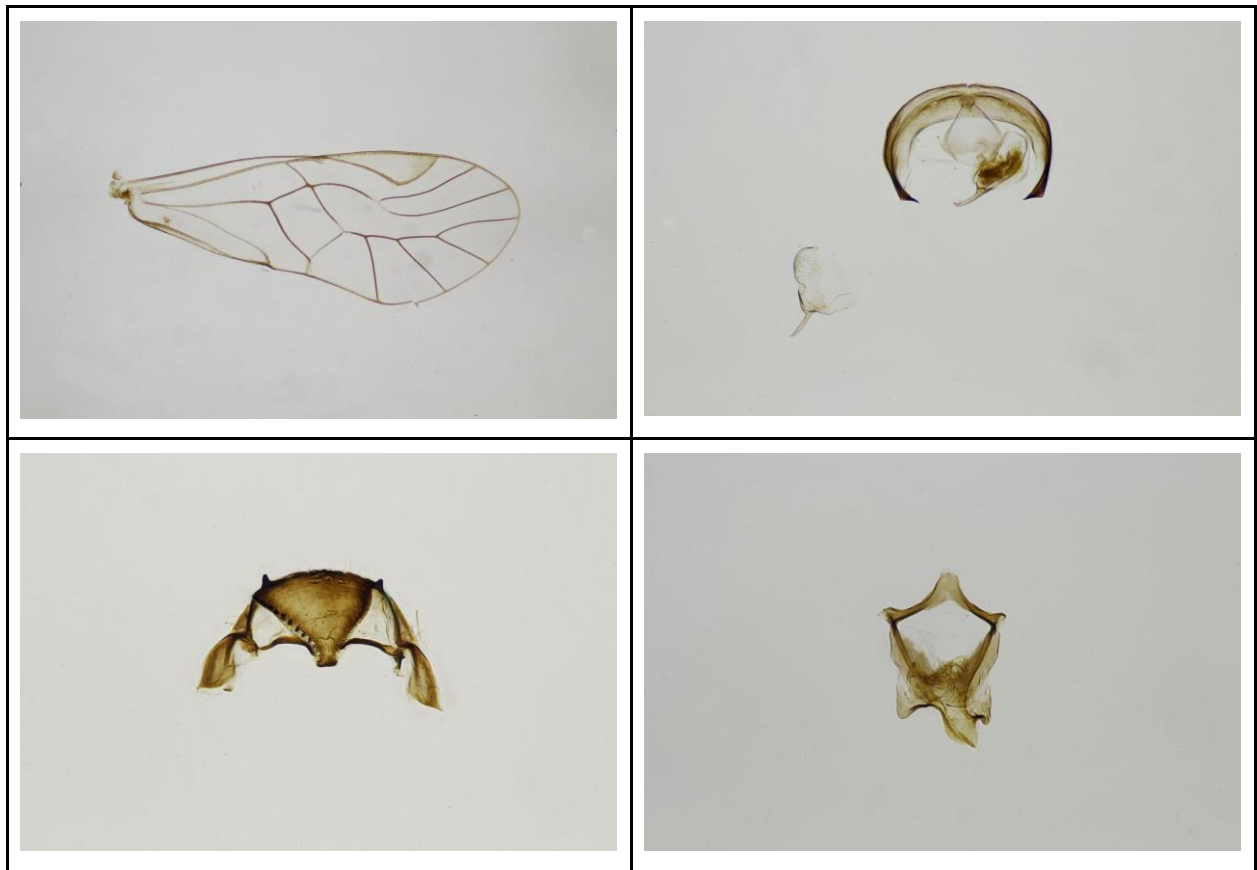

**Figure E18.** Plate depicting major morphological traits (forewing [top left], para-epiproct [top-right], hypandrium/subgenital plate [bottom left], gonapophyses/related structures [bottom right]) for *Ptycta* (code: sp 42). Note that these structures were the only features preserved before processing the individual for molecular analyses.

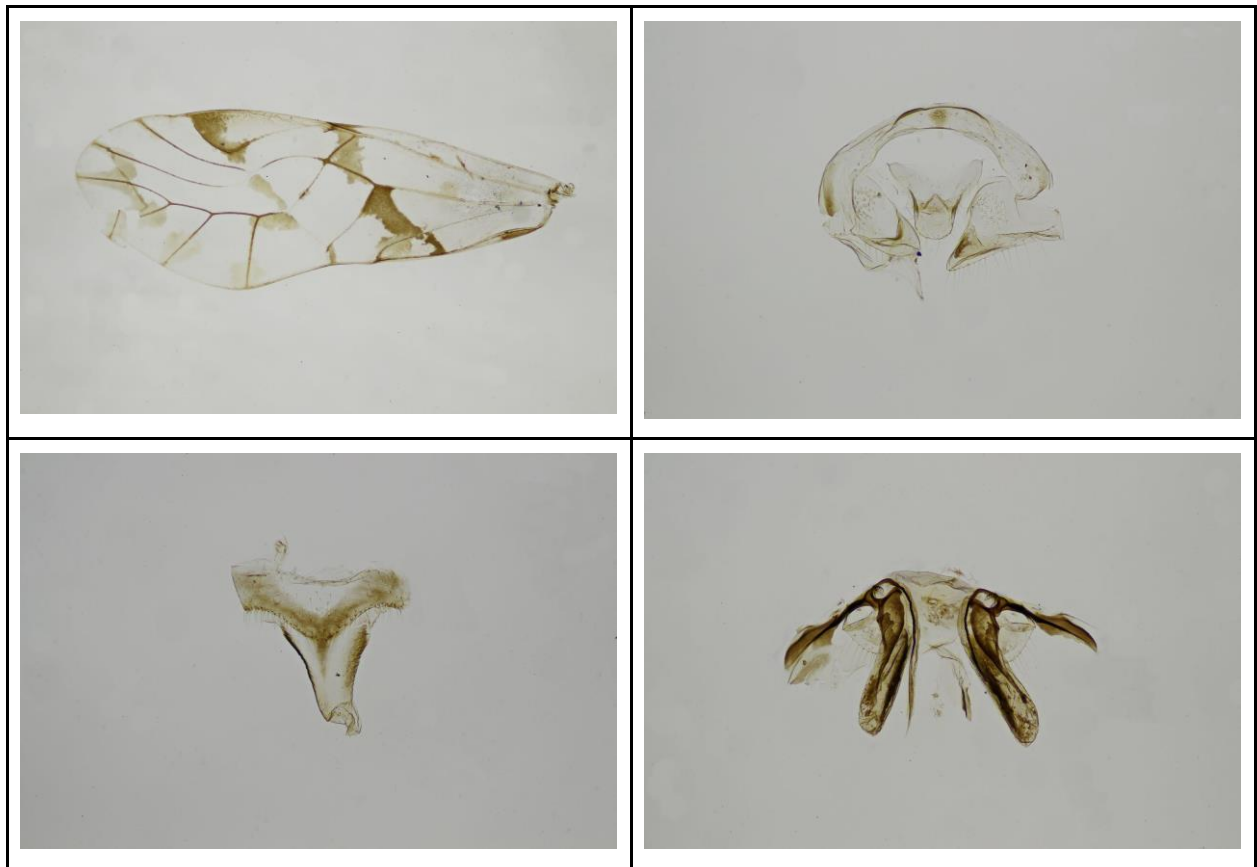

**Figure E19.** Plate depicting major morphological traits (forewing [top left], para-epiproct [top-right], hypandrium/subgenital plate [bottom left], gonapophyses/related structures [bottom right]) for *Steleops* (code: sp 43). Note that these structures were the only features preserved before processing the individual for molecular analyses.

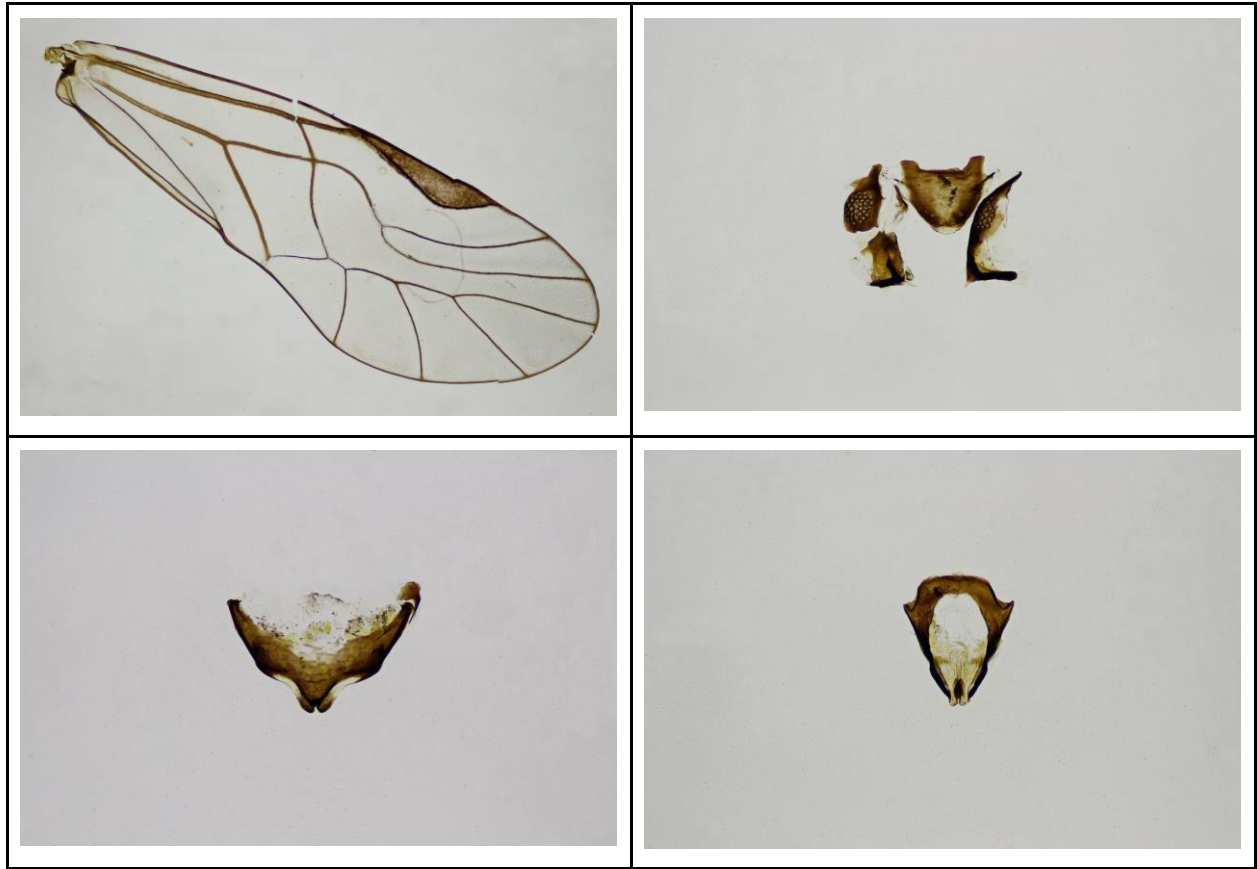

**Figure E20.** Plate depicting major morphological traits (forewing [top left], para-epiproct [top-right], hypandrium/subgenital plate [bottom left], gonapophyses/related structures [bottom right]) for *Thyrsophorini* (code: sp 29). Note that these structures were the only features preserved before processing the individual for molecular analyses.

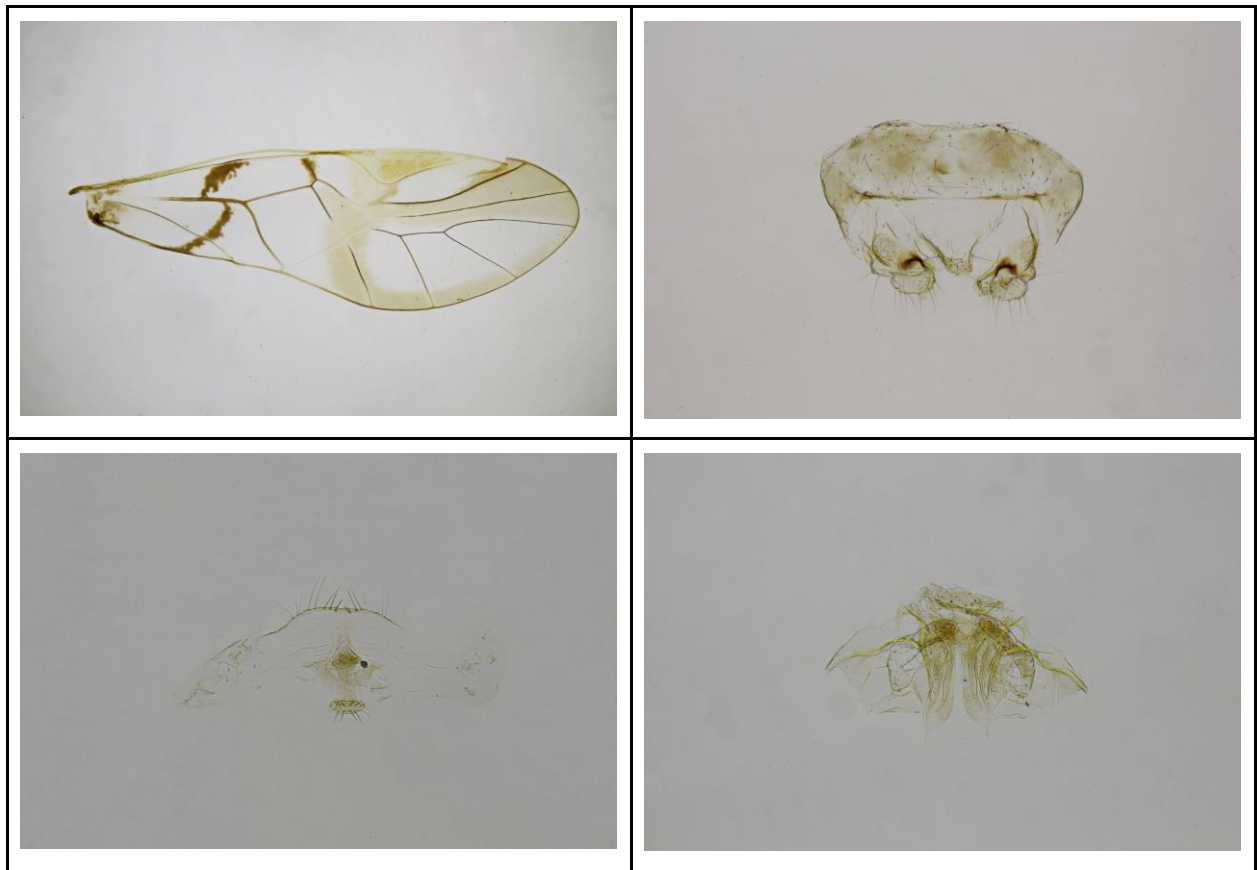

**Figure E21.** Plate depicting major morphological traits (forewing [top left], para-epiproct [top-right], hypandrium/subgenital plate [bottom left], gonapophyses/related structures [bottom right]) for Thyrsochorini (code: sp 21). Note that these structures were the only features preserved before processing the individual for molecular analyses.

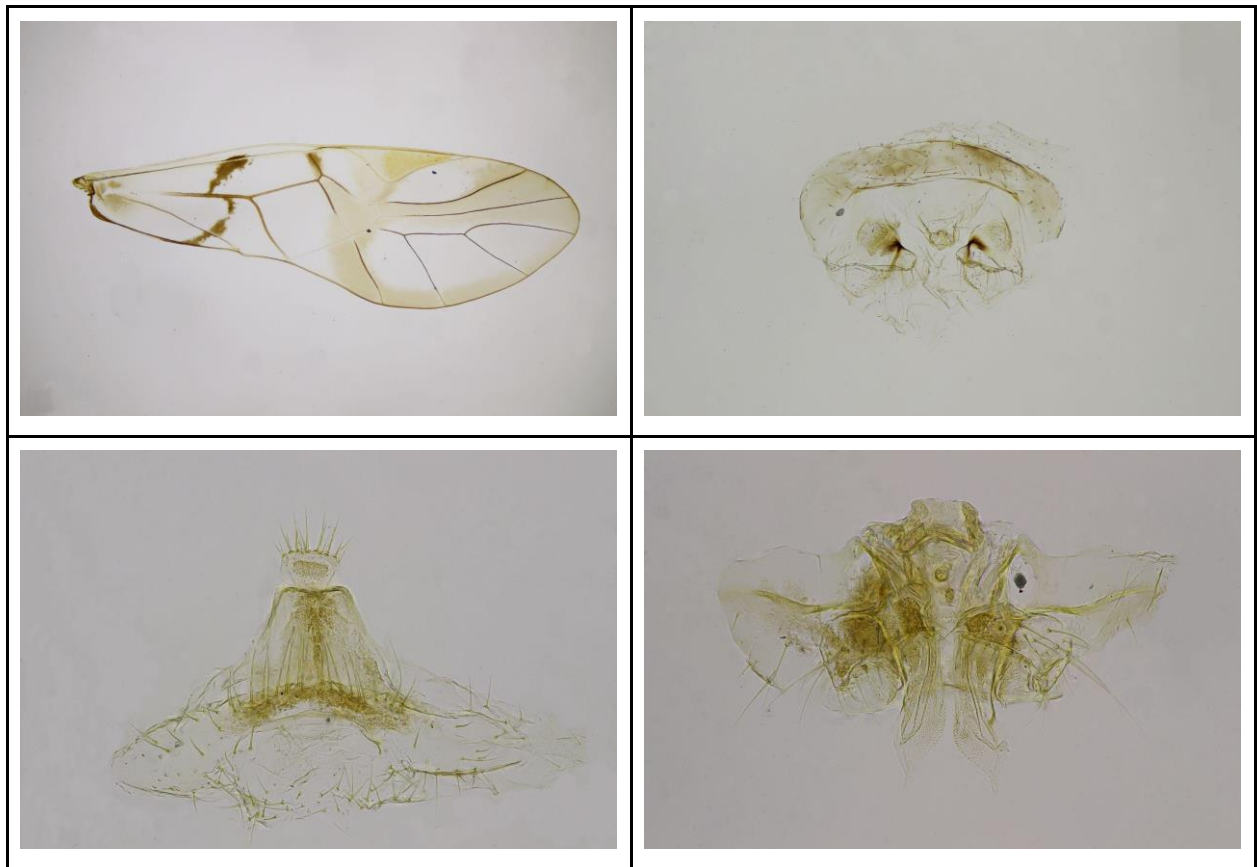

**Figure E22.** Plate depicting major morphological traits (forewing [top left], para-epiproct [top-right], hypandrium/subgenital plate [bottom left], gonapophyses/related structures [bottom right]) for Thyrsochorini (code: sp 23). Note that these structures were the only features preserved before processing the individual for molecular analyses.

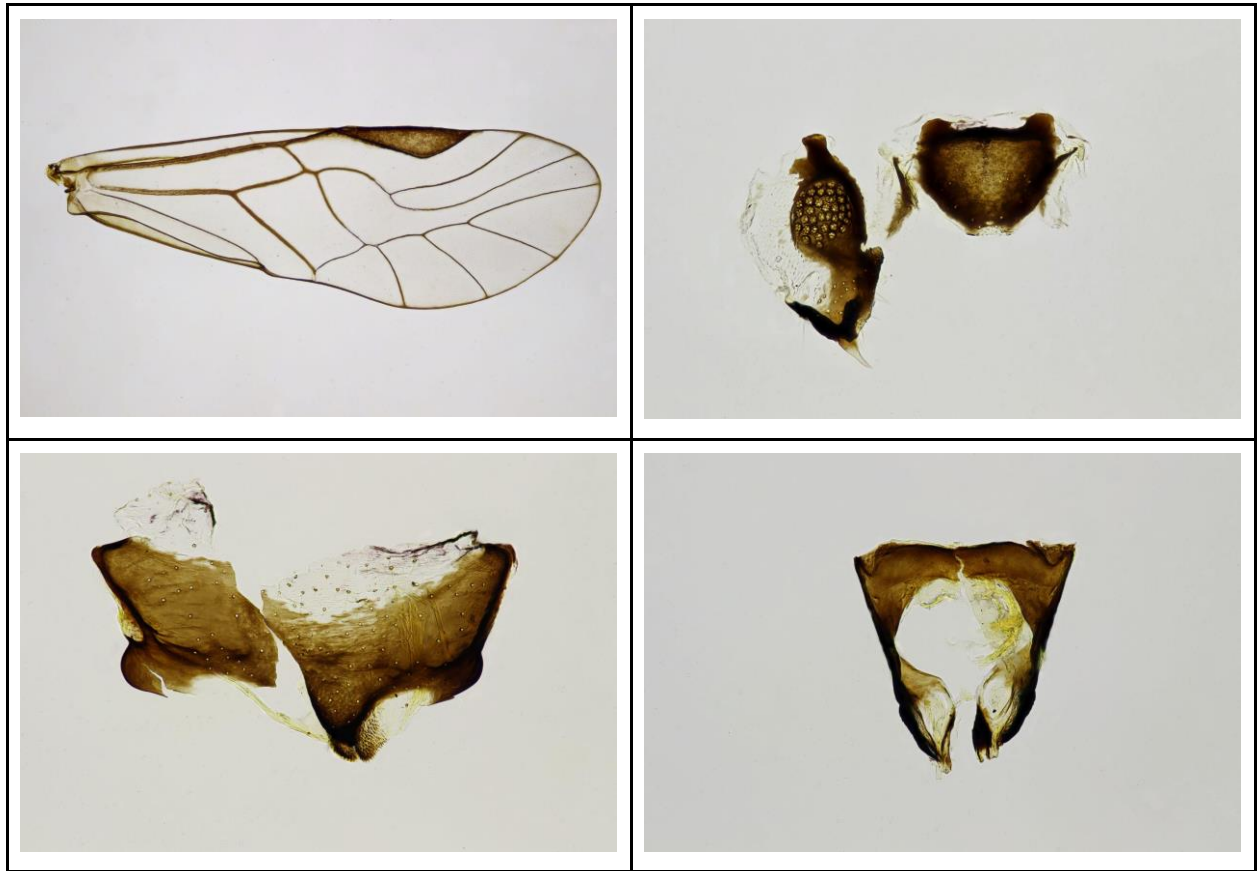

**Figure E23.** Plate depicting major morphological traits (forewing [top left], para-epiproct [top-right], hypandrium/subgenital plate [bottom left], gonapophyses/related structures [bottom right]) for *Thyrsophorini* (code: sp 33). Note that these structures were the only features preserved before processing the individual for molecular analyses.



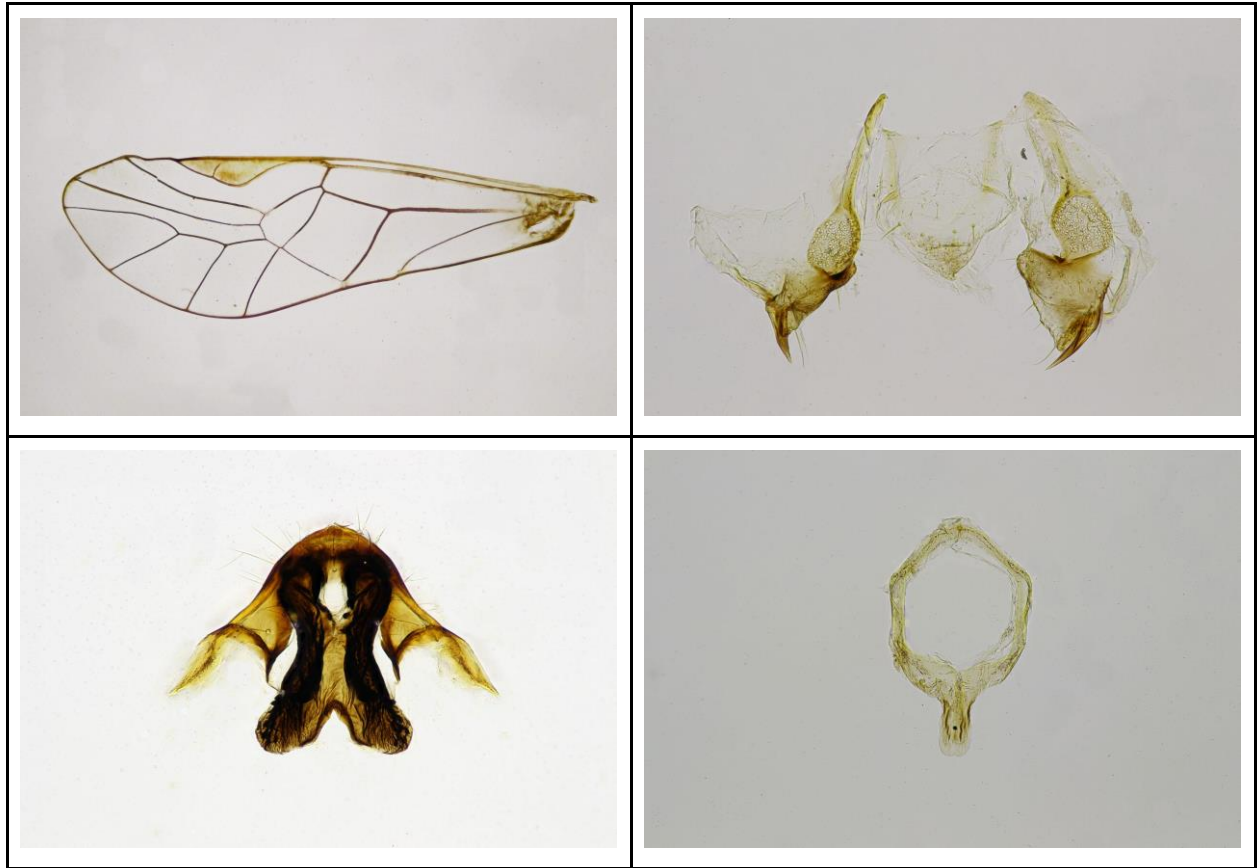

**Figure E24.** Plate depicting major morphological traits (forewing [top left], para-epiproct [top-right], hypandrium/subgenital plate [bottom left], gonapophyses/related structures [bottom right]) for *Thyrsopsocus* (code: sp 20). Note that these structures were the only features preserved before processing the individual for molecular analyses.

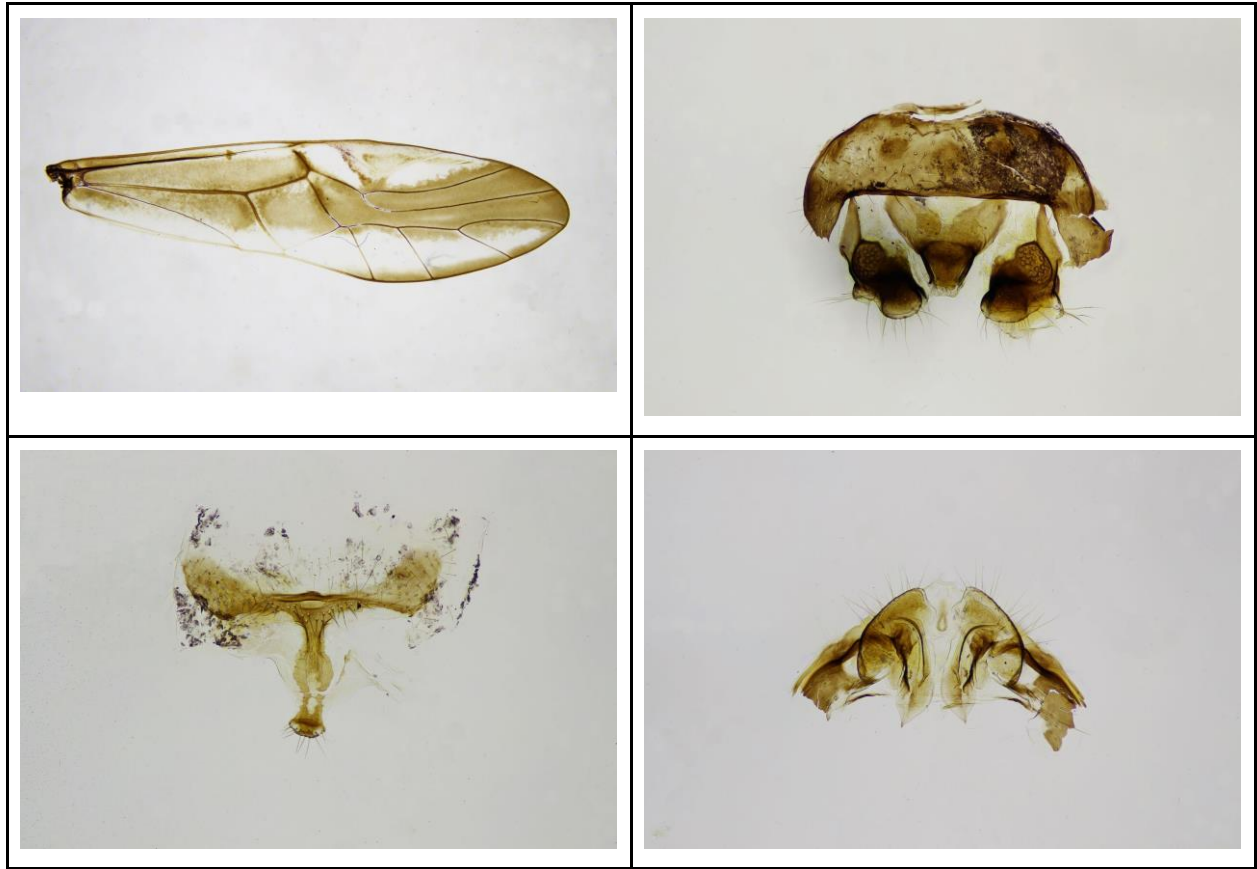

**Figure E25.** Plate depicting major morphological traits (forewing [top left], para-epiproct [top-right], hypandrium/subgenital plate [bottom left], gonapophyses/related structures [bottom right]) for *Thyrsopsocus* (code: sp 36). Note that these structures were the only features preserved before processing the individual for molecular analyses.

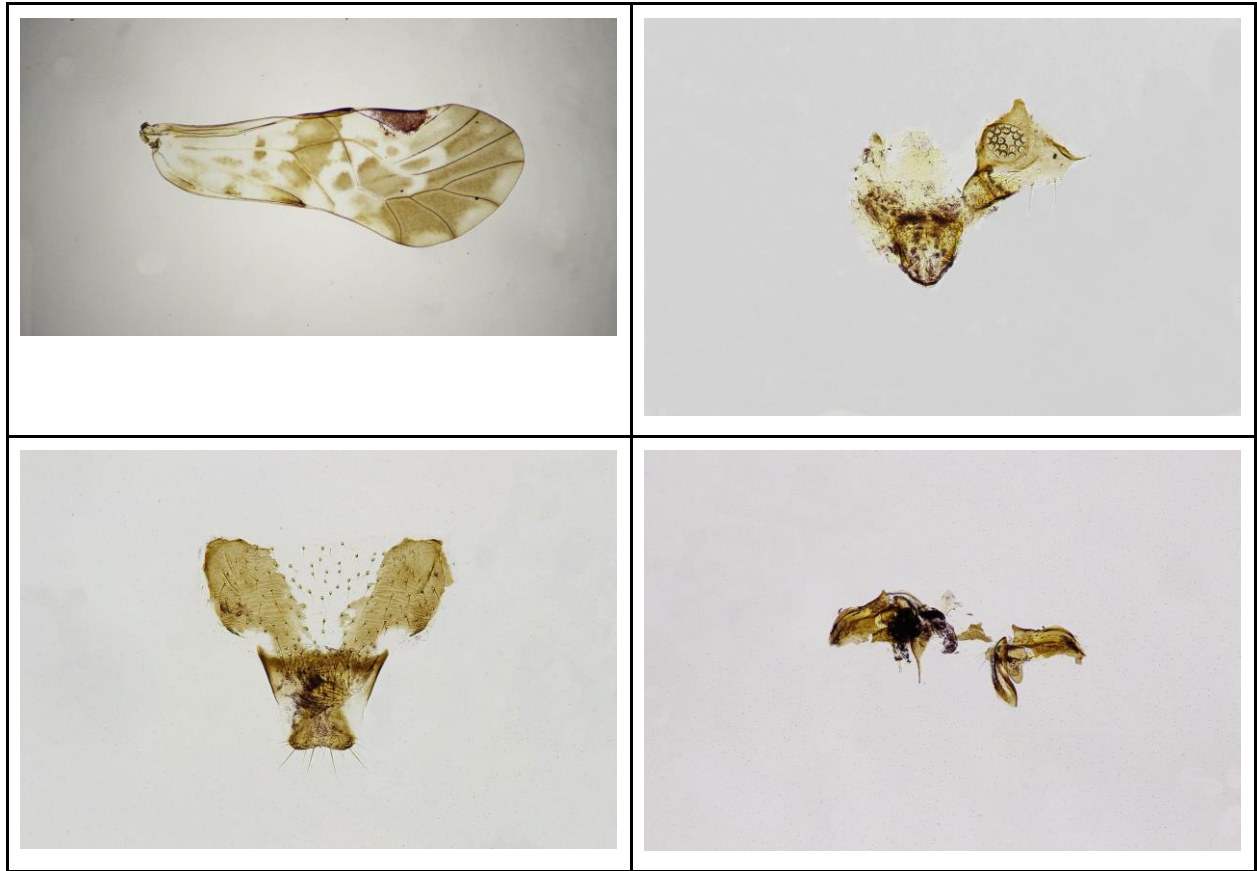

**Figure E26.** Plate depicting major morphological traits (forewing [top left], para-epiproct [top-right], hypandrium/subgenital plate [bottom left], gonapophyses/related structures [bottom right]) for *Trichadenotecnum* (code: sp 06). Note that these structures were the only features preserved before processing the individual for molecular analyses.

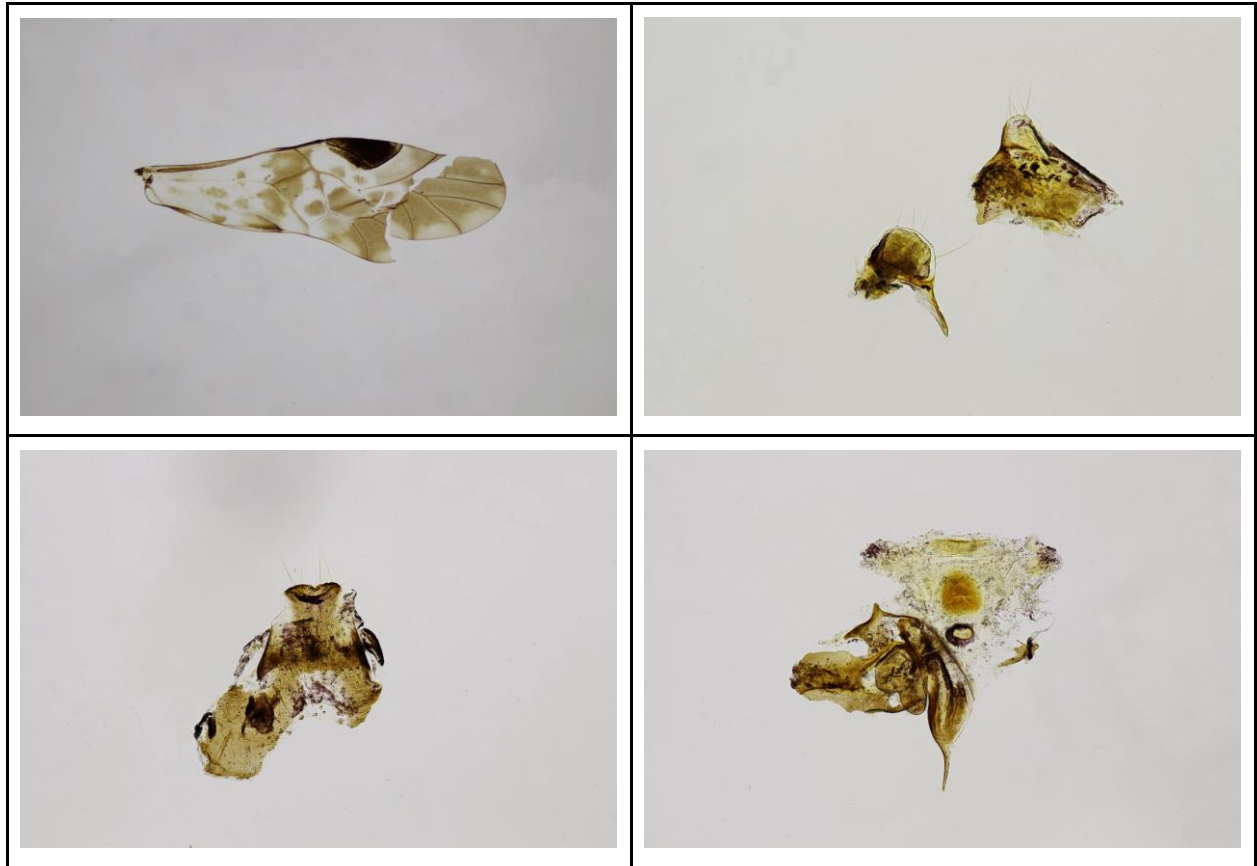

**Figure E27.** Plate depicting major morphological traits (forewing [top left], para-epiproct [top-right], hypandrium/subgenital plate [bottom left], gonapophyses/related structures [bottom right]) for *Trichadenotecnum* (code: sp 07). Note that these structures were the only features preserved before processing the individual for molecular analyses.

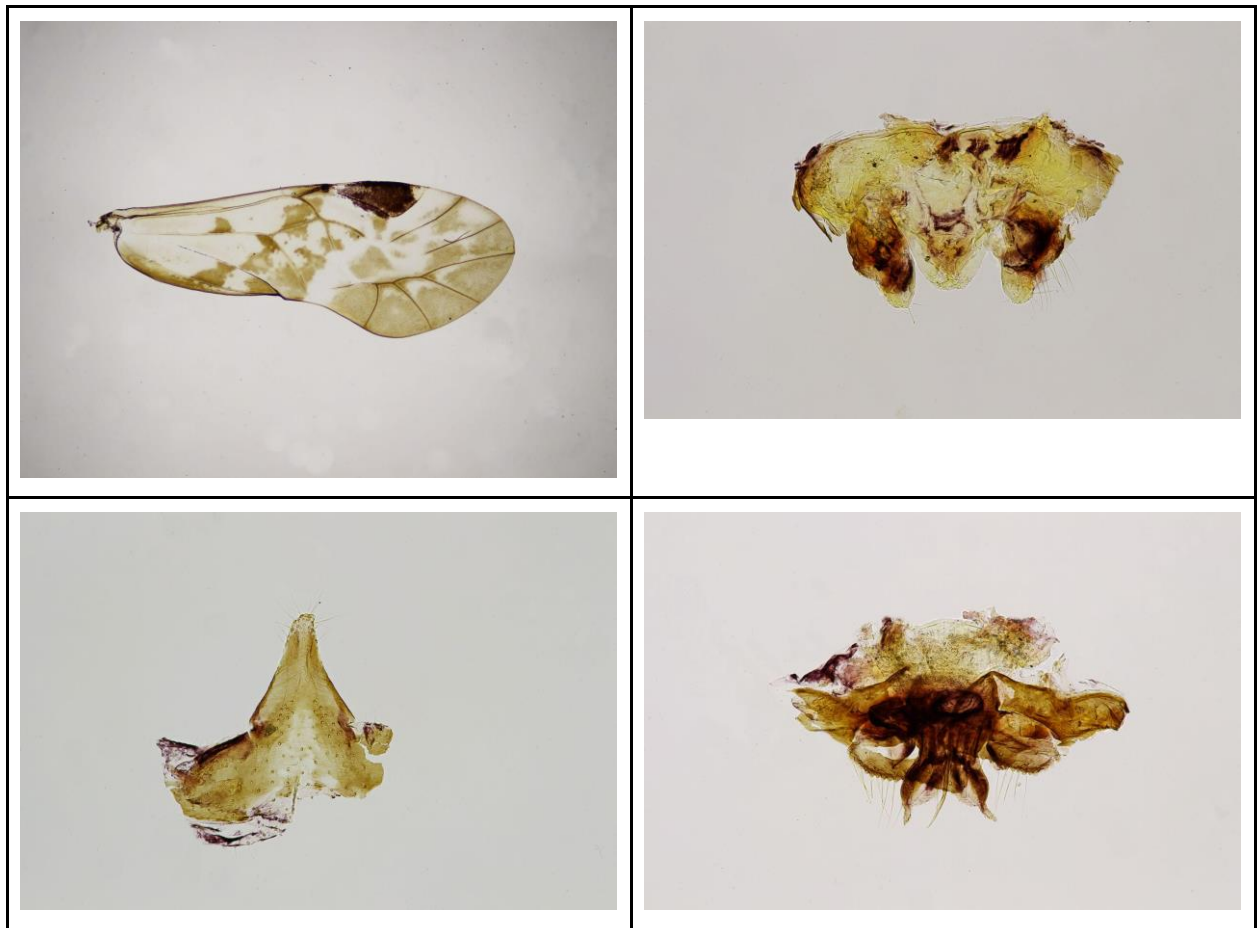

**Figure E28.** Plate depicting major morphological traits (forewing [top left], para-epiproct [top-right], hypandrium/subgenital plate [bottom left], gonapophyses/related structures [bottom right]) for *Trichadenotecnum* (code: sp 08). Note that these structures were the only features preserved before processing the individual for molecular analyses.

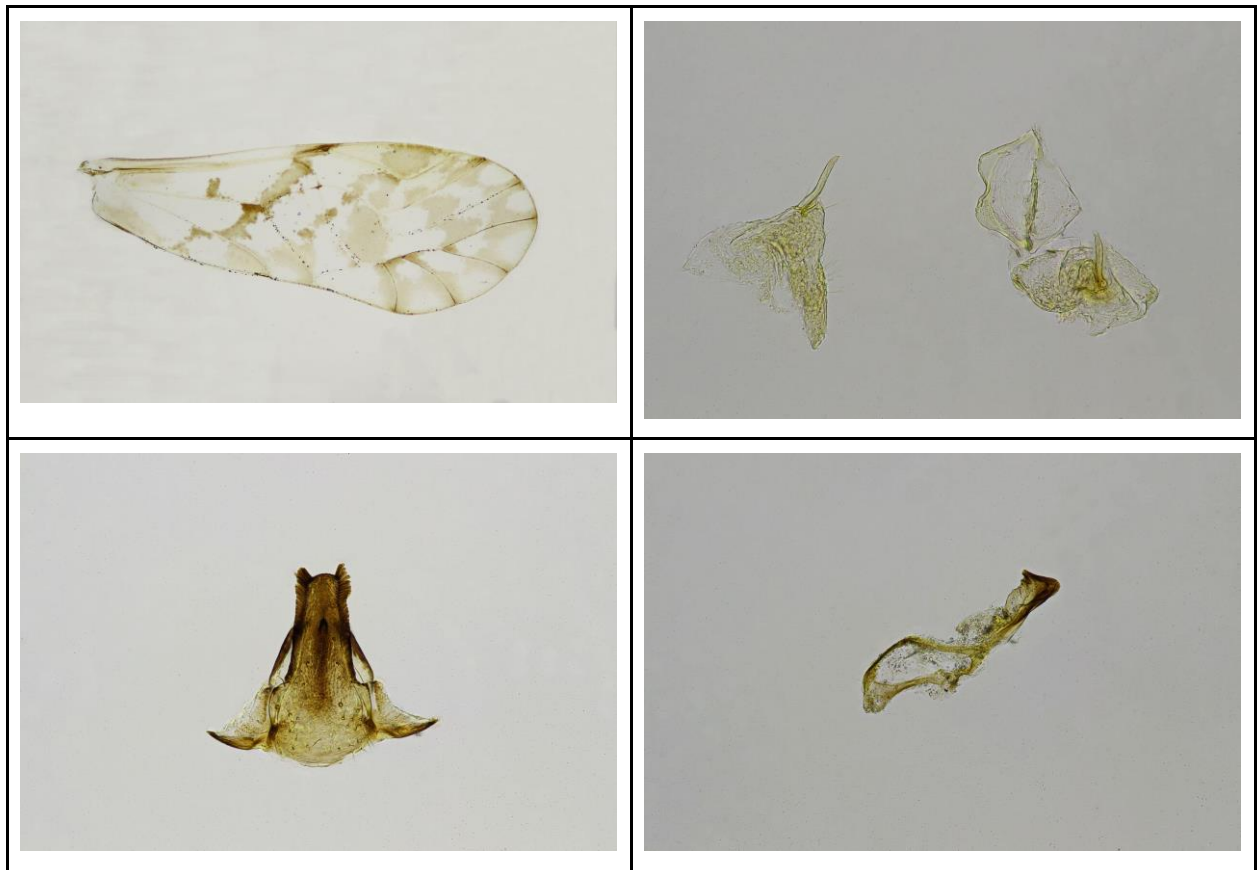

**Figure E29.** Plate depicting major morphological traits (forewing [top left], para-epiproct [top-right], hypandrium/subgenital plate [bottom left], gonapophyses/related structures [bottom right]) for *Trichadenotecnum* (code: sp 40). Note that these structures were the only features preserved before processing the individual for molecular analyses.
