# Supplementary material
Source: publisher figshare collection journal article supplement (https://brill.figshare.com/articles/dataset/_/25222046)
Supplement: Supplementary file 2 [file 1]

**Holarctic Lineages Cannot Inform Diversity and Evolution in the Neotropics – the barklice family Psocidae as a case study**

*Valentina Sarria-Rodríguez, Ranulfo Gonzalez-Obando, Nelson Rivera-Franco, Heiber Cardenas-Henao and Cristian Román-Palacios*

**APPENDIX S1**

**Text S1.** Script used to retrieve geographical distribution of Psocidae from

<http://psocodea.speciesfile.org>

**Table S1.** Summary of the geographical distribution of 753 psocid species.

**Table S2.** Summary of primers used to amplify the target gene regions in our study.

**Table S3.** PCR conditions used to amplify each of the three gene regions used in our study.

**Table S4.** Molecular sampling

**Figure S1.** Phylogeny of the Psocidae based on combining our newly generated samples to the ones from Yoshizawa and Johnson (2008).

**Other files**

**Supplementary File S1.** Published-only dataset alignment.

**Supplementary File S2.** Combined dataset alignment.

**Supplementary File S3.** PartitionFinder results.

**Supplementary File S4.** Phylogeny of the Psocidae based published-only dataset, inferred under Maximum Likelihood and with gene-based partitioning.

**Supplementary File S5.** Phylogeny of the Psocidae based published-only dataset, inferred under Maximum Likelihood and with codon-based partitioning.

**Supplementary File S6.** Phylogeny of the Psocidae based combined dataset, inferred under Maximum Likelihood and with gene-based partitioning.

**Supplementary File S7.** Phylogeny of the Psocidae based combined dataset, inferred under Maximum Likelihood and with codon-based partitioning.

**Supplementary File S8.** Phylogeny of the Psocidae based published-only dataset, inferred under Bayesian Inference and with gene-based partitioning.

**Supplementary File S9.** Phylogeny of the Psocidae based published-only dataset, inferred under Bayesian Inference and with codon-based partitioning.

**Supplementary File S10.** Phylogeny of the Psocidae based combined dataset, inferred under Bayesian Inference and with gene-based partitioning.

**Supplementary File S11.** Phylogeny of the Psocidae based combined dataset, inferred under Bayesian Inference and with codon-based partitioning.

**Supplementary File S12.** Phylogeny of the Psocidae based on combining our newly generated samples to the ones from Yoshizawa and Johnson (2008).

**Text S1.** Script used to retrieve the geographical distribution of Psocidae from

<http://psocodea.speciesfile.org> (Johnson et al. 2020). Functions utilized are implemented the httr,

jsonlite, and pbapply R packages. By Jun 25, 2020, this script retrieved a total of 1187 results.

The cleaned up database is presented in Table S1 for 753 species. We note that the range of

TaxonNameID for the Psocidae is approximate (based on manual searches), and likely represents a random sample of diversity within the family.

```
Psocidae_ranges <- pblapply(1195488:1199369, function(x) {
  Sys.sleep(.1)
  cat("\r", x)
  url <-
    paste0("http://psocodea.speciesfile.org/Common/basic/Taxa.aspx?TaxonNameID=",
           x)
  flightdata <- GET(url)
  output <- content(flightdata, as = "text") %>% htmlParse()

  if (any(
    xpathSApply(output, "//table/..//a", xmlValue)[8] %in% c(
      "Psocidae",
      "Amphigerontiinae",
      "Psocinae",
      "Kaindipsocinae",
      "Thyrsophorinae"
    )
  )) {
    cbind.data.frame(
      Subfamily = xpathSApply(output, "//table/..//a", xmlValue)[8],
      #Subfamily
      Genus = xpathSApply(output, "//table/..//a", xmlValue)[9],
      Species = xpathSApply(output, "//table/..//h1", xmlValue)[2],
      #Species
      Distribution = xpathSApply(output, "//table/..//li", xmlValue)[1]
    ) #Distribution
  }
})
```

**Table S1.** Summary of the geographical distribution for 753 Psocid species. We retrieved this dataset from <http://psocodea.speciesfile.org> (Johnson et al. 2020) using the script presented in Text S1. The presence (1) or absence (0) of each species in the Neotropics or in the Tropical region is indicated below.

| Subfamily        | Species                                   | Distribution                                                                                                                  | Neotropics |
|------------------|-------------------------------------------|-------------------------------------------------------------------------------------------------------------------------------|------------|
| Amphigerontiinae | Amphigerontia birabeni Williner, 1944     | Argentina                                                                                                                     | 1          |
|                  | Amphigerontia boliviana Navas, 1930       | Bolivia                                                                                                                       | 1          |
|                  | Amphigerontia diffusa Navas, 1933         | China                                                                                                                         | 0          |
|                  | Amphigerontia feai Ribaga, 1908           | Burma                                                                                                                         | 0          |
|                  | Amphigerontia guiyangica Li, 1990         | China                                                                                                                         | 0          |
|                  | Amphigerontia hyalina Enderlein, 1925     | Chile                                                                                                                         | 1          |
|                  | Amphigerontia incerta Ribaga, 1908        | Burma                                                                                                                         | 0          |
|                  | Amphigerontia infernicola (Chapman, 1930) | USA                                                                                                                           | 0          |
|                  | Amphigerontia intermedia (Tetens, 1891)   | Germany; Czechoslovakia; Finland;<br>France; Hungary; Italy; Netherlands;<br>Poland; Romania; Sweden;<br>Switzerland; USSR; : | 0          |
|                  | Amphigerontia jezoensis Okamoto, 1907     | Japan; China; Taiwan; USSR                                                                                                    | 0          |
|                  | Amphigerontia lata Enderlein, 1926        | Indonesia                                                                                                                     | 0          |
|                  | Amphigerontia lhasana Li & Yang, 1987     | China                                                                                                                         | 0          |

---

|                                                  |                                       |   |
|--------------------------------------------------|---------------------------------------|---|
| Amphigerontia limpida Navas, 1920                | Argentina                             | 1 |
| Amphigerontia longicauda Mockford & Anonby, 2007 | USA                                   | 0 |
| Amphigerontia minutissima (Enderlein, 1908)      | Tanzania                              | 0 |
| Amphigerontia montivaga (Chapman, 1930)          | USA; Guatemala; Mexico                | 1 |
| Amphigerontia nadleri Mockford, 1996             | Venezuela                             | 1 |
| Amphigerontia namiana Navas, 1920                | Vietnam                               | 0 |
| Amphigerontia nervosa Navas, 1932                | Argentina                             | 1 |
| Amphigerontia petiolata (Banks, 1918)            | USA; Canada; Mexico                   | 1 |
| Amphigerontia tincta Navas, 1920                 | Argentina                             | 1 |
| Amphigerontia titschacki Navas, 1927             | Costa Rica                            | 1 |
| Amphigerontia umbrata Navas, 1927                | Columbia                              | 1 |
| Amphigerontia voeltzkowi Enderlein, 1908         | Tanzania                              | 0 |
| Blaste (Blaste) angolensis Badonnel, 1955        | Angola                                | 0 |
| Blaste (Blaste) castala Thornton & Lyall, 1978   | Chile                                 | 1 |
| Blaste (Blaste) macrura New, 1972                | Brazil                                | 1 |
| Blaste (Blaste) quieta (Hagen, 1861)             | North America; Canada; USA;<br>Panama | 1 |
| Blaste (Blastopsis) lyriphallus New, 1973        | Nigeria                               | 0 |
| Blaste (Blastopsis) triangularum Badonnel, 1955  | Angola                                | 0 |

---

|                                                         |                                                                                                                                                                                                                                       |   |
|---------------------------------------------------------|---------------------------------------------------------------------------------------------------------------------------------------------------------------------------------------------------------------------------------------|---|
| Blaste (Euclismia) alluaudi (Badonnel, 1935)            | Madagascar                                                                                                                                                                                                                            | 0 |
| Blaste (Euclismia) aptera Broadhead & Richards, 1980    | Tanzania                                                                                                                                                                                                                              | 0 |
| Blaste (Euclismia) arabica New, 1979                    | Saudi Arabia                                                                                                                                                                                                                          | 0 |
| Blaste (Euclismia) balli (Badonnel, 1945)               | Morocco; Algeria                                                                                                                                                                                                                      | 0 |
| Blaste (Euclismia) betschi Badonnel, 1976               | Madagascar                                                                                                                                                                                                                            | 0 |
| Blaste (Euclismia) binotata (Enderlein, 1926)           | Indonesia                                                                                                                                                                                                                             | 0 |
| Blaste (Euclismia) cinerea (Enderlein, 1903)            | India                                                                                                                                                                                                                                 | 0 |
| Blaste (Euclismia) conspurcata (Rambur, 1842)           | Europe; Austria; Belgium;<br>Czechoslovakia; Finland; France;<br>Germany; Greece; Hungary; Israel;<br>Italy; Luxembourg; Morocco;<br>Norway; Poland; Romania; Spain;<br>Sweden; Switzerland; Turkey; USSR;<br>Yugoslavia; Mongolia; : | 0 |
| Blaste (Euclismia) cyprica Lienhard, 1995               | Cyprus                                                                                                                                                                                                                                | 0 |
| Blaste (Euclismia) didyma Lienhard, 1986                | Spain                                                                                                                                                                                                                                 | 0 |
| Blaste (Euclismia) dundoensis Badonnel, 1955            | Angola                                                                                                                                                                                                                                | 0 |
| Blaste (Euclismia) falsa Badonnel, 1976                 | Madagascar                                                                                                                                                                                                                            | 0 |
| Blaste (Euclismia) lusambaensis Badonnel, 1973          | Angola                                                                                                                                                                                                                                | 0 |
| Blaste (Euclismia) membranosa Lienhard & Halperin, 1988 | Israel                                                                                                                                                                                                                                | 0 |
| Blaste (Euclismia) monserrati Baz, 1990                 | South Africa                                                                                                                                                                                                                          | 0 |

|                                                       |                                                                                                                                                                                                                                    |   |
|-------------------------------------------------------|------------------------------------------------------------------------------------------------------------------------------------------------------------------------------------------------------------------------------------|---|
| Blaste (Euclismia) nairobensis New, 1975              | Kenya                                                                                                                                                                                                                              | 0 |
| Blaste (Euclismia) obtusa (Hagen, 1858)               | Sri Lanka; Japan                                                                                                                                                                                                                   | 0 |
| Blaste (Euclismia) quadrimaculata (Latreille, 1794)   | Europe; Austria; Belgium;<br>Czechoslovakia; Finland; France;<br>Germany; Great Britain; Hungary;<br>Ireland; Italy; Luxembourg;<br>Morocco; Netherlands; Poland;<br>Portugal; Romania; Spain;<br>Switzerland; USSR; Yugoslavia; : | 0 |
| Blaste (Euclismia) sarda Lienhard, 1986               | Italy                                                                                                                                                                                                                              | 0 |
| Blaste (Euclismia) similis Broadhead & Richards, 1980 | Tanzania; South Africa                                                                                                                                                                                                             | 0 |
| Blaste (Euclismia) suffusa Broadhead & Richards, 1980 | Kenya                                                                                                                                                                                                                              | 0 |
| Blaste (Euclismia) ukingana (Enderlein, 1902)         | Tanzania                                                                                                                                                                                                                           | 0 |
| Blaste (Euclismiopsis) fuscoptera New, 1975           | Kenya                                                                                                                                                                                                                              | 0 |
| Blaste (Euclismiopsis) machadoi Badonnel, 1955        | Angola                                                                                                                                                                                                                             | 0 |
| Blaste (Euclismiopsis) medleri New, 1975              | Nigeria; Burkina Faso                                                                                                                                                                                                              | 0 |
| Blaste (Euclismiopsis) pauliani (Badonnel, 1943)      | Cameroon                                                                                                                                                                                                                           | 0 |
| Blaste (Euclismiopsis) peringueyi (Enderlein, 1925)   | Zimbabwe; Congo                                                                                                                                                                                                                    | 0 |
| Blaste (Euclismiopsis) smilivirgata Li, 1989          | China                                                                                                                                                                                                                              | 0 |
| Blaste (Euclismiopsis) vilhenai Badonnel, 1955        | Angola                                                                                                                                                                                                                             | 0 |
| Chaetopsocidus sturmi Badonnel, 1986                  | Colombia                                                                                                                                                                                                                           | 1 |

|                |                                           |                        |   |
|----------------|-------------------------------------------|------------------------|---|
|                | Elaphopsocus glaphyrostigma Roesler, 1940 | Brazil                 | 1 |
| Kaindipsocinae | Blaste furcilla (New, 1974)               | Australia              | 0 |
|                | Blaste lunulata (New, 1974)               | Australia              | 0 |
|                | Blaste macrops (Smithers, 1984)           | Australia              | 0 |
|                | Blaste panops (Smithers, 1979)            | Australia              | 0 |
|                | Blaste tillyardi (Smithers, 1969)         | New Zealand; Australia | 0 |
| Psocidae       | Blaste alfineta New, 1972                 | Brazil                 | 1 |
|                | Blaste amazonica Garcia Aldrete, 1999     | Brazil                 | 1 |
|                | Blaste angusta Smithers, 1984             | Australia              | 0 |
|                | Blaste angustipennis Mockford, 1996       | Venezuela              | 1 |
|                | Blaste auricularia Badonnel, 1987         | Venezuela              | 1 |
|                | Blaste bicuspis Smithers, 1964            | Madagascar             | 0 |
|                | Blaste bistriata Schmidt & Thornton, 1993 | Australia              | 0 |
|                | Blaste bridarollii (Navas, 1928)          | Argentina              | 1 |
|                | Blaste capricornuta Mockford, 1974        | Cuba                   | 1 |
|                | Blaste caudata Mockford, 1991             | Brazil                 | 1 |
|                | Blaste cockerelli (Banks, 1904)           | USA                    | 0 |
|                | Blaste cornuta Badonnel, 1987             | Venezuela              | 1 |
|                | Blaste euryphylla Li & Yang, 1987         | China                  | 0 |



---

|                                           |                           |   |
|-------------------------------------------|---------------------------|---|
| Blaste fasciata Mockford, 1974            | Cuba                      | 1 |
| Blaste forcepata (New, 1972)              | Brazil                    | 1 |
| Blaste forficula Schmidt & Thornton, 1993 | Australia                 | 0 |
| Blaste fusimera New & Thornton, 1975      | Brazil                    | 1 |
| Blaste garciorum Mockford, 1984           | Mexico                    | 1 |
| Blaste hamata Mockford, 1991              | Brazil                    | 1 |
| Blaste immobilis Mockford, 1974           | Cuba                      | 1 |
| Blaste lignicola (Enderlein, 1906)        | Australia; Norfolk Island | 0 |
| Blaste longicauda Mockford, 1974          | Cuba                      | 1 |
| Blaste longipennis (Banks, 1918)          | USA                       | 0 |
| Blaste longispina Mockford, 1991          | Brazil                    | 1 |
| Blaste longivalva New, 1975               | Singapore                 | 0 |
| Blaste magnifica Smithers, 1984           | Australia                 | 0 |
| Blaste martini (Navas, 1922)              | Chile                     | 1 |
| Blaste memorialis (Banks, 1920)           | Colombia                  | 1 |
| Blaste muhni (Navas, 1928)                | Argentina                 | 1 |
| Blaste nana New, 1975                     | Singapore                 | 0 |
| Blaste neotenica Mockford, 1996           | Venezuela                 | 1 |
| Blaste nubeculosa (Navas, 1932)           | Argentina                 | 1 |

---

|                                       |              |   |
|---------------------------------------|--------------|---|
| Blaste nubilistigma Mockford, 1996    | Venezuela    | 1 |
| Blaste obscura (New, 1972)            | Brazil       | 1 |
| Blaste opposita (Banks, 1907)         | USA; Canada  | 0 |
| Blaste oregona (Banks, 1900)          | USA          | 0 |
| Blaste osceola Mockford, 1984         | USA          | 0 |
| Blaste osella Lienhard, 1987          | Algeria      | 0 |
| Blaste pallida Mockford, 1996         | Venezuela    | 1 |
| Blaste persimilis (Banks, 1908)       | USA          | 0 |
| Blaste plaumanni New, 1978            | Brazil       | 1 |
| Blaste polioptera Smithers, 1964      | Madagascar   | 0 |
| Blaste posticata (Banks, 1905)        | Mexico; USA  | 1 |
| Blaste pseudozonata (Williner, 1945)  | Argentina    | 1 |
| Blaste pusilla Mockford, 1984         | Mexico       | 1 |
| Blaste richardsi New, 1972            | Brazil       | 1 |
| Blaste rotundata (Navas, 1918)        | Argentina    | 1 |
| Blaste serrata New, 1973              | Thailand     | 0 |
| Blaste simillima (Enderlein, 1925)    | South Africa | 0 |
| Blaste squarrosa New & Thornton, 1975 | Uruguay      | 1 |
| Blaste stuckenbergi Smithers, 1964    | Madagascar   | 0 |

|                                                  |            |   |
|--------------------------------------------------|------------|---|
| Blaste subquieta (Chapman, 1930)                 | USA        | 0 |
| Blaste taylori New, 1974                         | Australia  | 0 |
| Blaste togoensis Turner & Cheke, 1983            | Togo       | 0 |
| Blaste vadoni Badonnel, 1967                     | Madagascar | 0 |
| Blastopsocidus acutus Badonnel, 1967             | Madagascar | 0 |
| Blastopsocidus affinis Badonnel, 1967            | Madagascar | 0 |
| Blastopsocidus areolatus Badonnel, 1967          | Madagascar | 0 |
| Blastopsocidus brasiliensis (New, 1972)          | Brazil     | 1 |
| Blastopsocidus caudatus Badonnel, 1967           | Madagascar | 0 |
| Blastopsocidus cristatus Badonnel, 1967          | Madagascar | 0 |
| Blastopsocidus maculatus (Badonnel, 1955)        | Angola     | 0 |
| Blastopsocidus marginalis Badonnel, 1967         | Madagascar | 0 |
| Blastopsocidus montanus Badonnel, 1967           | Madagascar | 0 |
| Blastopsocidus pictus Broadhead & Richards, 1980 | Kenya      | 0 |
| Blastopsocidus strictus (Smithers, 1964)         | Madagascar | 0 |
| Blastopsocidus wittmeri Badonnel, 1981           | Pakistan   | 0 |
| Blastopsocus angustus Smithers & Thornton, 1981  | New Guinea | 0 |
| Blastopsocus goodrichi Mockford, 2002            | USA        | 0 |
| Blastopsocus johnstoni Mockford, 2002            | USA        | 0 |

---

|                                                     |                                |   |
|-----------------------------------------------------|--------------------------------|---|
| Blastopsocus lithinus (Chapman, 1930)               | USA; Canada; Guatemala; Mexico | 1 |
| Blastopsocus mockfordi Badonnel, 1986               | Colombia; Brazil               | 1 |
| Blastopsocus semistriatus (Walsh, 1862)             | USA; Mexico                    | 1 |
| Blastopsocus uncinatus (Thornton & Woo, 1973)       | Galapagos                      | 0 |
| Blastopsocus variabilis (Aaron, 1883)               | USA; Panama                    | 1 |
| Blastopsocus walshi Mockford, 2002                  | USA                            | 0 |
| Clematostigma brevistylus (Enderlein, 1903)         | New Guinea; Samoa              | 0 |
| Clematostigma fumatum (Enderlein, 1903)             | New Guinea                     | 0 |
| Clematostigma hyalinum (Okamoto, 1907)              | Taiwan; China; Japan           | 0 |
| Clematostigma indicum (Enderlein, 1903)             | India                          | 0 |
| Clematostigma lunulatum Schmidt & Thornton, 1993    | Australia                      | 0 |
| Clematostigma maculiceps (Enderlein, 1903)          | Australia                      | 0 |
| Clematostigma paraguayense Enderlein, 1910          | Paraguay                       | 1 |
| Clematostigma striatum Schmidt & Thornton, 1993     | Australia                      | 0 |
| Clematostigma subcostale (Okamoto, 1907)            | Taiwan; China; Japan           | 0 |
| Clematostigma vinctum (Enderlein, 1903)             | Australia                      | 0 |
| Dictyopsocus pennicornis (Burmeister, 1839)         | Brazil; Argentina              | 1 |
| Elytropsocus coleoptratus Smithers & Thornton, 1981 | New Guinea                     | 0 |
| Epiblaste glandacea Li, 1993                        | China                          | 0 |

---

|                                                    |                         |   |
|----------------------------------------------------|-------------------------|---|
| Euclismioides inocellata Smithers & Thornton, 1981 | New Guinea              | 0 |
| Gigantopsocus metallicus (Enderlein, 1900)         | Peru                    | 1 |
| Indoblaste lienhardi Endang & Thornton, 1992       | Indonesia               | 0 |
| Indoblaste sastrawani Endang & Thornton, 1992      | Indonesia               | 0 |
| Kaindipsocus emarginatus Smithers, 1997            | Australia               | 0 |
| Kaindipsocus marksae Smithers, 1997                | Australia               | 0 |
| Kaindipsocus mixtus Smithers & Thornton, 1981      | New Guinea              | 0 |
| Lasiopsocus brevipilosus Enderlein, 1919           | South Africa            | 0 |
| Lasiopsocus dicellus Smithers, 1984                | Australia               | 0 |
| Lasiopsocus hollowayi Smithers, 1997               | Australia               | 0 |
| Lasiopsocus michaelsoni Enderlein, 1907            | Australia               | 0 |
| Lasiopsocus simulatus Smithers, 1983               | Australia               | 0 |
| Neoblaste alticola Thornton, 1984                  | Indonesia               | 0 |
| Neoblaste brunnea Endang & Thornton, 1992          | Indonesia               | 0 |
| Neoblaste cubitalis (Enderlein, 1919)              | Singapore; Indonesia    | 0 |
| Neoblaste fujianensis (Li & Yang, 1987)            | China                   | 0 |
| Neoblaste guangdongensis New, 1991                 | China                   | 0 |
| Neoblaste harpophylla Li, 1993                     | China                   | 0 |
| Neoblaste papillosa Thornton, 1960                 | Hong Kong; China; Korea | 0 |

|                                              |                                                                                                         |   |
|----------------------------------------------|---------------------------------------------------------------------------------------------------------|---|
| Neoblaste pinicola Li, 1990                  | China                                                                                                   | 0 |
| Neoblaste setosa Thornton, 1960              | Hong Kong; China                                                                                        | 0 |
| Neoblaste tateokana (Okamoto, 1907)          | Japan                                                                                                   | 0 |
| Neopsocopsis flavida (Li, 1989)              | China                                                                                                   | 0 |
| Neopsocopsis hirticornis (Reuter, 1893)      | Finland; France; Germany; Hungary;<br>Italy; Romania; Spain; Switzerland;<br>USSR; Yugoslavia; Mongolia | 0 |
| Neopsocopsis longiptera Vishnyakova, 1986    | USSR                                                                                                    | 0 |
| Neopsocopsis pentasticha (Lienhard, 2003)    | China                                                                                                   | 0 |
| Neopsocopsis profunda (Li, 1995)             | China                                                                                                   | 0 |
| Neopsocopsis quinquentata (Li & Yang, 1988)  | China                                                                                                   | 0 |
| Poecilopsocus anticus (Walker, 1853)         | Brazil                                                                                                  | 1 |
| Poecilopsocus beaveri (New, 1972)            | Brazil                                                                                                  | 1 |
| Poecilopsocus bishopi (New, 1972)            | Brazil                                                                                                  | 1 |
| Poecilopsocus calocoroides (Enderlein, 1900) | Peru                                                                                                    | 1 |
| Poecilopsocus cinctus (Enderlein, 1903)      | Brazil                                                                                                  | 1 |
| Poecilopsocus iridescens (Enderlein, 1901)   | Ecuador; Peru                                                                                           | 1 |
| Poecilopsocus leucotelus (Walker, 1853)      | Brazil                                                                                                  | 1 |
| Poecilopsocus pulcher (Enderlein, 1906)      | Central America                                                                                         | 1 |
| Poecilopsocus richardsi (New, 1972)          | Brazil                                                                                                  | 1 |

|                                             |                                            |   |
|---------------------------------------------|--------------------------------------------|---|
| Tanystigma bifurcatum Smithers, 1984        | Australia                                  | 0 |
| Tanystigma dubium (New, 1974)               | Australia                                  | 0 |
| Tanystigma edwardsi (New, 1974)             | Australia                                  | 0 |
| Tanystigma elongatum Smithers, 1984         | Australia                                  | 0 |
| Tanystigma inglewoodense (New, 1974)        | Australia                                  | 0 |
| Tanystigma latimentulum (Smithers, 1977)    | Australia                                  | 0 |
| Tanystigma longitibia Smithers, 1998        | Australia                                  | 0 |
| Tanystigma notiale (Smithers, 1972)         | Australia                                  | 0 |
| Tanystigma paulum (Smithers, 1977)          | Australia                                  | 0 |
| Tanystigma striatifrons (McLachlan, 1866)   | Australia                                  | 0 |
| Tanystigma tardipes (Edwards, 1950)         | Australia                                  | 0 |
| Tanystigma valvula Schmidt & Thornton, 1993 | Australia                                  | 0 |
| Thyrsochorus formosus Navas, 1934           | Brazil                                     | 1 |
| Thyrsochorus speciosus Burmeister, 1839     | Brazil; Panama; French Guiana;<br>Suriname | 1 |
| Thyrsochorus trabeatus (Enderlein, 1925)    | Colombia                                   | 1 |
| Thyrsochorus aequatorialis Enderlein, 1901  | Ecuador; Brazil                            | 1 |
| Thyrsochorus angularis Mockford, 1992       | Panama                                     | 1 |
| Thyrsochorus bellulus Banks, 1930           | Honduras                                   | 1 |

---

|                                                   |                                                                               |   |
|---------------------------------------------------|-------------------------------------------------------------------------------|---|
| Thyrsoopsocus bellus (McLachlan, 1866)            | Brazil; Bolivia                                                               | 1 |
| Thyrsoopsocus bolivari Badonnel, 1987             | Venezuela                                                                     | 1 |
| Thyrsoopsocus brasiliensis New, 1980              | Brazil                                                                        | 1 |
| Thyrsoopsocus elegans (Enderlein, 1925)           | Brazil                                                                        | 1 |
| Thyrsoopsocus fairchildi Mockford, 1992           | Panama                                                                        | 1 |
| Thyrsoopsocus newi Mockford, 1992                 | Panama                                                                        | 1 |
| Thyrsoopsocus peruanus Enderlein, 1900            | Peru                                                                          | 1 |
| Thyrsoopsocus pretiosus Banks, 1930               | Panama                                                                        | 1 |
| Thyrsoopsocus psocoides Enderlein, 1900           | Peru; Mexico                                                                  | 1 |
| Thyrsoopsocus stigmaticus Banks, 1924             | Peru                                                                          | 1 |
| Arabopsocus spiniproctus Lienhard, 2008           | Uae                                                                           | 0 |
| Atlantopsocus adustus (Hagen, 1865)               | Madeira; Azores; Canary Islands                                               | 0 |
| Atlantopsocus parvidens Baz, 1988                 | Spain                                                                         | 0 |
| Atlantopsocus personatus (Hagen, 1865)            | Madeira; France; Greece; Ireland;<br>Italy; Morocco; Spain; Canary<br>Islands | 0 |
| Atlantopsocus semicircularis Baz, 1989            | Morocco                                                                       | 0 |
| Atlantopsocus triangularis Meinander, 1973        | Canary Islands                                                                | 0 |
| Atrichadenotecnum nudum (Thornton, 1961)          | Hong Kong; China                                                              | 0 |
| Atrichadenotecnum quadripunctatum Yoshizawa, 1998 | Japan                                                                         | 0 |

---



|                                                   |                       |   |
|---------------------------------------------------|-----------------------|---|
| Atrichadenotecnum ryukyuense Yoshizawa, 1998      | Japan                 | 0 |
| Atrichadenotecnum umbratum (New & Thornton, 1976) | Malaysia              | 0 |
| Atropsocus atratus (Aaron, 1883)                  | USA                   | 0 |
| Barrowia insularis Smithers, 1984                 | Australia             | 0 |
| Brachinodiscus cinctipes (Enderlein, 1900)        | Peru; Bolivia; Brazil | 1 |
| Camelopsocus bactrianus Mockford, 1984            | USA                   | 0 |
| Camelopsocus hiemalis Mockford, 1984              | USA                   | 0 |
| Camelopsocus monticolus Mockford, 1965            | Mexico                | 1 |
| Camelopsocus similis Mockford, 1965               | Mexico                | 1 |
| Camelopsocus tucsonensis Mockford, 1984           | USA                   | 0 |
| Cerastipsocus aldretei Badonnel, 1986             | Mexico                | 1 |
| Cerastipsocus beaveri New, 1972                   | Brazil                | 1 |
| Cerastipsocus bogotanus (Kolbe, 1883)             | Colombia              | 1 |
| Cerastipsocus brasilianus (Enderlein, 1903)       | Brazil                | 1 |
| Cerastipsocus claripennis Mockford, 1996          | Venezuela             | 1 |
| Cerastipsocus coloratus (Kolbe, 1883)             | Colombia              | 1 |
| Cerastipsocus consocius (Navas, 1934)             | Brazil                | 1 |
| Cerastipsocus cornutus Mockford, 1996             | Venezuela             | 1 |
| Cerastipsocus cubanus Enderlein, 1919             | Cuba                  | 1 |

|                                                   |                                                                                             |   |
|---------------------------------------------------|---------------------------------------------------------------------------------------------|---|
| Cerastipsocus dubius Badonnel, 1969               | Angola                                                                                      | 0 |
| Cerastipsocus fuscipennis (Burmeister, 1839)      | Brazil; Argentina                                                                           | 1 |
| Cerastipsocus iguazuensis (Williner, 1945)        | Argentina                                                                                   | 1 |
| Cerastipsocus infectus (McLachlan, 1866)          | Colombia                                                                                    | 1 |
| Cerastipsocus kolbei New, 1972                    | Brazil                                                                                      | 1 |
| Cerastipsocus macrostigmatus Li & Yang, 1987      | China                                                                                       | 0 |
| Cerastipsocus moestus (Kolbe, 1883)               | Colombia                                                                                    | 1 |
| Cerastipsocus ochraceocristatus (Enderlein, 1900) | Peru                                                                                        | 1 |
| Cerastipsocus reductus (Banks, 1920)              | Mexico                                                                                      | 1 |
| Cerastipsocus rufus (Navas, 1912)                 | Peru                                                                                        | 1 |
| Cerastipsocus rugosus New & Thornton, 1975        | Brazil                                                                                      | 1 |
| Cerastipsocus sivorii (Ribaga, 1908)              | Uruguay                                                                                     | 1 |
| Cerastipsocus tostus (Navas, 1924)                | Costa Rica                                                                                  | 1 |
| Cerastipsocus trifasciatus (Provancher, 1876)     | Canada; USA; Costa Rica;<br>Guatemala; Mexico; Nicaragua;<br>Panama; Colombia; Venezuela; : | 1 |
| Cerastipsocus venosus (Burmeister, 1839)          | USA; Canada; Cuba; Mexico; :                                                                | 1 |
| Cerastipsocus vetustus (Kolbe, 1883)              | Colombia                                                                                    | 1 |
| Cerastipsocus willineri New & Thornton, 1975      | Brazil                                                                                      | 1 |
| Cervopsocus medialis New, 1978                    | Brazil                                                                                      | 1 |

---

|                                                     |                                       |   |
|-----------------------------------------------------|---------------------------------------|---|
| Clematoscenea apta Smithers & Thornton, 1981        | New Guinea                            | 0 |
| Clematoscenea biloba Smithers & Thornton, 1981      | New Guinea                            | 0 |
| Clematoscenea biroi (Enderlein, 1903)               | New Guinea                            | 0 |
| Clematoscenea goilala Smithers & Thornton, 1981     | New Guinea                            | 0 |
| Clematoscenea gressitti Smithers & Thornton, 1981   | New Guinea                            | 0 |
| Clematoscenea josephinae New, 1983                  | Nepal                                 | 0 |
| Clematoscenea lemniscata (Enderlein, 1903)          | Indonesia; Malaysia                   | 0 |
| Clematoscenea longitarsus Smithers & Thornton, 1981 | New Guinea                            | 0 |
| Clematoscenea macalpinei Smithers & Thornton, 1981  | Bismarck Archipelago; Solomon Islands | 0 |
| Clematoscenea mosomensis Smithers & Thornton, 1981  | New Guinea                            | 0 |
| Clematoscenea pulchra Smithers & Thornton, 1981     | New Guinea                            | 0 |
| Copostigma bilineatum (Smithers & Thornton, 1981)   | New Guinea                            | 0 |
| Copostigma collinum (Thornton, 1981)                | Fiji                                  | 0 |
| Copostigma dispersum (Thornton, 1981)               | Fiji; Melanesia                       | 0 |
| Copostigma dorsopunctatum Enderlein, 1903           | New Guinea                            | 0 |
| Copostigma gracilisura Smithers & Thornton, 1990    | New Hebrides                          | 0 |
| Copostigma gressitti Smithers & Thornton, 1990      | New Hebrides                          | 0 |
| Copostigma insularum (Thornton, 1981)               | Tonga; Melanesia                      | 0 |

---

|                                                 |                            |   |
|-------------------------------------------------|----------------------------|---|
| Copostigma majus (Smithers & Thornton, 1981)    | New Guinea                 | 0 |
| Copostigma marosticum (Thornton, 1981)          | Fiji                       | 0 |
| Copostigma montanum (Smithers & Thornton, 1981) | New Guinea                 | 0 |
| Copostigma ouvea Smithers & Thornton, 1990      | New Caledonia              | 0 |
| Copostigma sitivanum (Thornton, 1981)           | Fiji                       | 0 |
| Copostigma trimaculatum (Hagen, 1858)           | Sri Lanka; Malaysia        | 0 |
| Copostigma vitiense (Karny, 1926)               | Fiji; Melanesia; Polynesia | 0 |
| Cycetes collessi Smithers, 1977                 | Australia                  | 0 |
| Cycetes thyrsochoroides Enderlein, 1907         | Indonesia                  | 0 |
| Dactylopsocus fumigatus (Kolbe, 1883)           | Brazil                     | 1 |
| Dactylopsocus similis Mockford, 1991            | Brazil                     | 1 |
| Diplacanthoda bouvieri Enderlein, 1909          | Madagascar                 | 0 |
| Eremopsocus crassicornis (Kolbe, 1883)          | Brazil                     | 1 |
| Eremopsocus flagellicornis (Kolbe, 1883)        | Colombia                   | 1 |
| Eremopsocus flavatus (Navas, 1925)              | Costa Rica                 | 1 |
| Eremopsocus infumatus McLachlan, 1866           | Brazil                     | 1 |
| Eremopsocus mockfordi Badonnel, 1986            | Mexico                     | 1 |
| Eremopsocus nigripes Mockford, 1975             | Brazil                     | 1 |
| Ghesquierella cantralli Mockford, 1957          | Guatemala; Mexico; Panama  | 1 |

|                                               |                                                                                                                                              |   |
|-----------------------------------------------|----------------------------------------------------------------------------------------------------------------------------------------------|---|
| Ghesquierella ealensis Badonnel, 1949         | Congo                                                                                                                                        | 0 |
| Ghesquierella sjoestedti (Enderlein, 1907)    | Tanzania                                                                                                                                     | 0 |
| Hyalopsocus contrarius (Reuter, 1893)         | Finland; Belgium; Czechoslovakia;<br>Germany; Hungary; Poland;<br>Romania; Spain; USSR; Mongolia; :                                          | 0 |
| Hyalopsocus floridanus (Banks, 1905)          | USA; Canada                                                                                                                                  | 0 |
| Hyalopsocus gardinii (Lienhard, 1983)         | Italy                                                                                                                                        | 0 |
| Hyalopsocus morio (Latreille, 1794)           | Europe: Belgium; France; Germany;<br>Great Britain; Greece; Luxembourg;<br>Italy; Netherlands; Poland; Romania;<br>Spain; Switzerland. USSR. | 0 |
| Hyalopsocus striatus (Walker, 1853)           | USA; Canada                                                                                                                                  | 0 |
| Indiopsocus abouchaari (Badonnel, 1986)       | Colombia                                                                                                                                     | 1 |
| Indiopsocus alticola Mockford, 1974           | Cuba                                                                                                                                         | 1 |
| Indiopsocus palisadensis Turner, 1975         | Jamaica                                                                                                                                      | 0 |
| Indiopsocus pallidus Mockford, 1974           | Cuba                                                                                                                                         | 1 |
| Indiopsocus paranensis (New & Thornton, 1975) | Brazil                                                                                                                                       | 1 |
| Indiopsocus pulcher Turner, 1975              | Jamaica                                                                                                                                      | 0 |
| Indiopsocus rosalesi Mockford, 1996           | Venezuela                                                                                                                                    | 1 |
| Indiopsocus sinuatistigma (New, 1972)         | Brazil                                                                                                                                       | 1 |
| Kimunpsocus chubsugulensis (Günther, 1982)    | Mongolia                                                                                                                                     | 0 |

---

|                                      |                                                                                                                                                                                                                                                                  |   |
|--------------------------------------|------------------------------------------------------------------------------------------------------------------------------------------------------------------------------------------------------------------------------------------------------------------|---|
| Loensia bicolor (Enderlein, 1900)    | Peru                                                                                                                                                                                                                                                             | 1 |
| Loensia bifurcata (Li, 1992)         | China                                                                                                                                                                                                                                                            | 0 |
| Loensia conspersa (Banks, 1903)      | USA                                                                                                                                                                                                                                                              | 0 |
| Loensia excrescens Li, 1997          | China                                                                                                                                                                                                                                                            | 0 |
| Loensia falcata Li, 1997             | China                                                                                                                                                                                                                                                            | 0 |
| Loensia fasciata (Fabricius, 1787)   | Europe; Austria; Belgium;<br>Czechoslovakia; Denmark; Finland;<br>France; Germany; Great Britain;<br>Greece; Hungary; Ireland; Italy;<br>Luxembourg; Morocco; Netherlands;<br>Norway; Poland; Romania; Spain;<br>Switzerland; USSR; Yugoslavia;<br>USA; Korea; : | 0 |
| Loensia fuscimacula Enderlein, 1926  | Indonesia                                                                                                                                                                                                                                                        | 0 |
| Loensia glabridorsum Enderlein, 1926 | Indonesia                                                                                                                                                                                                                                                        | 0 |
| Loensia infundibularis (Li, 1989)    | China                                                                                                                                                                                                                                                            | 0 |
| Loensia maculosa (Banks, 1908)       | USA                                                                                                                                                                                                                                                              | 0 |
| Loensia moesta (Hagen, 1861)         | USA; Canada                                                                                                                                                                                                                                                      | 0 |
| Loensia pearmani Kimmins, 1941       | Austria; Bulgaria; Czechoslovakia;<br>Finland; France; Germany; Great<br>Britain; Greece; Hungary;<br>Luxembourg; Netherlands; Norway;<br>Poland; Romania; Spain;<br>Switzerland; USSR; Yugoslavia; :                                                            | 0 |

---

|                                          |                                                                                                                                                                                                                                                                                               |   |
|------------------------------------------|-----------------------------------------------------------------------------------------------------------------------------------------------------------------------------------------------------------------------------------------------------------------------------------------------|---|
| Loensia spicata Li, 1995                 | China                                                                                                                                                                                                                                                                                         | 0 |
| Loensia spissa Li, 1995                  | China                                                                                                                                                                                                                                                                                         | 0 |
| Loensia stigmatoidea (Li, 1993)          | China                                                                                                                                                                                                                                                                                         | 0 |
| Loensia taeniana (Li & Yang, 1987)       | China                                                                                                                                                                                                                                                                                         | 0 |
| Loensia teretiuscula (Li & Yang, 1987)   | China                                                                                                                                                                                                                                                                                         | 0 |
| Loensia variegata (Latreille, 1799)      | Europe; Austria; Belgium; Cyprus;<br>Czechoslovakia; Denmark; Finland;<br>France; Germany; Great Britain;<br>Greece; Hungary; Ireland; Israel;<br>Italy; Luxembourg; Netherlands;<br>Norway; Poland; Portugal; Romania;<br>Spain; Sweden; Switzerland; USSR;<br>Yugoslavia; Canary Islands; : | 0 |
| Longivalvus dictyodromus Li, 1993        | China                                                                                                                                                                                                                                                                                         | 0 |
| Longivalvus radiatus Li, 1993            | China                                                                                                                                                                                                                                                                                         | 0 |
| Mecampsis cinctifemur Enderlein, 1925    | Chile                                                                                                                                                                                                                                                                                         | 1 |
| Mecampsis insolita (Banks, 1938)         | Haiti                                                                                                                                                                                                                                                                                         | 0 |
| Mecampsis laconia (Banks, 1941)          | Santo Domingo                                                                                                                                                                                                                                                                                 | 1 |
| Mecampsis pindapoiensis (Williner, 1943) | Argentina                                                                                                                                                                                                                                                                                     | 1 |
| Metylophorus barretti (Banks, 1900)      | Mexico                                                                                                                                                                                                                                                                                        | 1 |
| Metylophorus bicornutus Li & Yang, 1987  | China                                                                                                                                                                                                                                                                                         | 0 |
| Metylophorus bishopi New, 1972           | Brazil                                                                                                                                                                                                                                                                                        | 1 |

|                                                |                       |   |
|------------------------------------------------|-----------------------|---|
| Metylophorus brevantenninus Li & Yang, 1987    | China                 | 0 |
| Metylophorus cabanae (Williner, 1944)          | Argentina             | 1 |
| Metylophorus calcaratus Mockford, 1991         | Brazil                | 1 |
| Metylophorus camptodontus Li & Yang, 1992      | China                 | 0 |
| Metylophorus contaminatus Li & Yang, 1987      | China                 | 0 |
| Metylophorus ctenatus New, 1972                | Brazil                | 1 |
| Metylophorus cuneatus (Navas, 1932)            | Argentina             | 1 |
| Metylophorus denticulatus (Enderlein, 1910)    | Paraguay              | 1 |
| Metylophorus diplodurus Li, 1992               | China                 | 0 |
| Metylophorus fasciatus New, 1980               | Brazil                | 1 |
| Metylophorus fuscatus New, 1978                | Bhutan                | 0 |
| Metylophorus hemiphaeopterus (Enderlein, 1900) | Peru; Panama; Bolivia | 1 |
| Metylophorus hispidus Mockford, 1991           | Brazil                | 1 |
| Metylophorus lisae Thornton, 1984              | Indonesia             | 0 |
| Metylophorus maculosus Mockford, 1996          | Venezuela             | 1 |
| Metylophorus marmoreus Li & Yang, 1988         | China                 | 0 |
| Metylophorus megistus Li, 1997                 | China                 | 0 |
| Metylophorus mendax Badonnel, 1955             | Angola                | 0 |
| Metylophorus nebulifer (Navas, 1932)           | Argentina             | 1 |



|                                                 |                                                                                                   |   |
|-------------------------------------------------|---------------------------------------------------------------------------------------------------|---|
| Metylophorus novaescotiae (Walker, 1853)        | Canada; USA; Mexico                                                                               | 1 |
| Metylophorus paranebulosus New, 1978            | Bhutan; India                                                                                     | 0 |
| Metylophorus plebius Li, 1989                   | China                                                                                             | 0 |
| Metylophorus purus (Walsh, 1862)                | USA; Canada                                                                                       | 0 |
| Metylophorus rotundatus Li, 1992                | China                                                                                             | 0 |
| Metylophorus symmetricus Mockford, 1991         | Brazil                                                                                            | 1 |
| Metylophorus theresopolitanus (Enderlein, 1910) | Brazil                                                                                            | 1 |
| Metylophorus tricornis Li, 1993                 | China                                                                                             | 0 |
| Metylophorus trivalvis Li, 1992                 | China                                                                                             | 0 |
| Metylophorus wui Li, 1995                       | China                                                                                             | 0 |
| Metylophorus wuyinicus Li & Yang, 1987          | China                                                                                             | 0 |
| Metylophorus xizangensis Li & Yang, 1987        | China                                                                                             | 0 |
| Neopsocus rhenanus Kolbe, 1882                  | Germany; Austria; Bulgaria; France;<br>Greece; Italy; Romania; Spain;<br>Turkey; USSR; Yugoslavia | 0 |
| Neopsocus tunesicus (Enderlein, 1923)           | Tunisia; Italy; Spain                                                                             | 0 |
| Ophthalmopsocus forficularis (Roesler, 1943)    | Bolivia                                                                                           | 1 |
| Ophthalmopsocus ocularis (Kolbe, 1883)          | Brazil                                                                                            | 1 |
| Ophthalmopsocus pallidus (New, 1972)            | Brazil                                                                                            | 1 |
| Oreopsocus buholzeri Lienhard, 1986             | Egypt                                                                                             | 0 |

|                                         |                                                                                                                                     |   |
|-----------------------------------------|-------------------------------------------------------------------------------------------------------------------------------------|---|
| Oreopsocus montanus (Kolbe, 1884)       | Austria; Bulgaria; Cyprus;<br>Czechoslovakia; France; Germany;<br>Greece; Italy; Poland; Romania;<br>Spain; Switzerland; Yugoslavia | 0 |
| Pearmania collarti Badonnel, 1946       | Congo                                                                                                                               | 0 |
| Pearmania crenulata New, 1973           | Nigeria; Togo                                                                                                                       | 0 |
| Pearmania fucata (Pearman, 1934)        | South Africa                                                                                                                        | 0 |
| Pearmania incuria (Navas, 1936)         | Kenya                                                                                                                               | 0 |
| Pearmania lapidicola Badonnel, 1969     | Angola                                                                                                                              | 0 |
| Pearmania nebulosa Badonnel, 1955       | Angola                                                                                                                              | 0 |
| Pearmania rutshuruana Badonnel, 1946    | Congo                                                                                                                               | 0 |
| Pearmania tangana Smithers, 1999        | Tanzania                                                                                                                            | 0 |
| Pearmania usambarana (Enderlein, 1907)  | Tanzania; South Africa;<br>Mozambique; Uganda; Zimbabwe                                                                             | 0 |
| Pearmania wittei Badonnel, 1959         | Congo                                                                                                                               | 0 |
| Pilipsocus angolensis Badonnel, 1955    | Angola                                                                                                                              | 0 |
| Pilipsocus areolatus Badonnel, 1969     | Angola                                                                                                                              | 0 |
| Pilipsocus congolensis Badonnel, 1948   | Congo; Nigeria                                                                                                                      | 0 |
| Pilipsocus ghesquierei Badonnel, 1949   | Congo; Angola                                                                                                                       | 0 |
| Pilipsocus intricatus (Enderlein, 1907) | Tanzania; Kenya; Angola; Equatorial<br>Guinea; Nigeria                                                                              | 0 |

|                                                |                           |   |
|------------------------------------------------|---------------------------|---|
| Pilipsocus lepesmei Badonnel, 1943             | Cameroon; Guinea; Nigeria | 0 |
| Pilipsocus machadoi Badonnel, 1955             | Angola                    | 0 |
| Pilipsocus vilhenai Badonnel, 1955             | Angola                    | 0 |
| Propsococerastis jiangkouensis Li & Yang, 1988 | China                     | 0 |
| Pseudoclematus xanthoznatus Li, 1992           | China                     | 0 |
| Psocidus albimaculatus Li, 1990                | China                     | 0 |
| Psocidus albovarius (Banks, 1920)              | Malaysia                  | 0 |
| Psocidus aldai (Navas, 1926)                   | Argentina                 | 1 |
| Psocidus annulipes (Reuter, 1899)              | Finland                   | 0 |
| Psocidus arenosus (Navas, 1922)                | Vietnam                   | 0 |
| Psocidus bicurris Li, 1990                     | China                     | 0 |
| Psocidus biguttatus Badonnel, 1948             | Congo                     | 0 |
| Psocidus borneensis (Banks, 1920)              | Malaysia                  | 0 |
| Psocidus burmeisteri (Navas, 1917)             | Argentina                 | 1 |
| Psocidus conio stigma (Navas, 1932)            | Argentina                 | 1 |
| Psocidus consitus (Hagen, 1858)                | Sri Lanka                 | 0 |
| Psocidus cuencanus (Enderlein, 1923)           | Ecuador                   | 1 |
| Psocidus dilutus (Navas, 1931)                 | Argentina                 | 1 |
| Psocidus ditatus (Navas, 1924)                 | Costa Rica                | 1 |

---

|                                       |                                      |   |
|---------------------------------------|--------------------------------------|---|
| Psocidus divisus (Navas, 1922)        | Vietnam                              | 0 |
| Psocidus femoratus (McLachlan, 1866)  | China                                | 0 |
| Psocidus funerulus (Costa, 1885)      | Italy                                | 0 |
| Psocidus fuscatus (Navas, 1916)       | Brazil                               | 1 |
| Psocidus ghesquierei Badonnel, 1946   | Congo                                | 0 |
| Psocidus gloriosus (Banks, 1920)      | Malaysia                             | 0 |
| Psocidus gomezi (Navas, 1928)         | Argentina                            | 1 |
| Psocidus grisescens (McLachlan, 1866) | South Africa                         | 0 |
| Psocidus guttulatus Pearman, 1934     | Angola; Kenya; Nigeria; South Africa | 0 |
| Psocidus hirsutus New, 1975           | Singapore                            | 0 |
| Psocidus irroratus (Enderlein, 1907)  | Australia                            | 0 |
| Psocidus jacobsoni (Enderlein, 1907)  | Indonesia                            | 0 |
| Psocidus japonicus (Kolbe, 1882)      | Japan                                | 0 |
| Psocidus javanicus (Enderlein, 1907)  | Indonesia                            | 0 |
| Psocidus komiensis (Navas, 1932)      | Congo                                | 0 |
| Psocidus kotzbaueri (Navas, 1925)     | Brazil                               | 1 |
| Psocidus lacroixi (Navas, 1920)       | Vietnam                              | 0 |
| Psocidus lestagei (Navas, 1922)       | Vietnam                              | 0 |

---

|                                               |                   |   |
|-----------------------------------------------|-------------------|---|
| Psocidus lobatus Endang & Thornton, 1992      | Indonesia         | 0 |
| Psocidus longicaudis Badonnel, 1946           | Congo             | 0 |
| Psocidus masinus (Navas, 1923)                | Philippines       | 0 |
| Psocidus mouldsi Smithers, 1984               | Australia         | 0 |
| Psocidus nexus (Navas, 1922)                  | Argentina         | 1 |
| Psocidus nigeriensis (Newstead, 1921)         | Nigeria           | 0 |
| Psocidus nubilus (Navas, 1934)                | India             | 0 |
| Psocidus oblitus (Hagen, 1858)                | Sri Lanka         | 0 |
| Psocidus oxyurus Badonnel, 1955               | Angola            | 0 |
| Psocidus parilla Smithers, 1984               | Australia         | 0 |
| Psocidus parishii (Banks, 1920)               | Peru              | 1 |
| Psocidus pellucidus (Okamoto, 1907)           | Japan             | 0 |
| Psocidus peregrans Cole, New & Thornton, 1989 | Indonesia         | 0 |
| Psocidus proctus Cole, New & Thornton, 1989   | Indonesia         | 0 |
| Psocidus proi (Navas, 1928)                   | Argentina; Brazil | 1 |
| Psocidus punctaticeps (Enderlein, 1910)       | Brazil            | 1 |
| Psocidus quadrisignatus (Banks, 1920)         | Brazil            | 1 |
| Psocidus reidi Thornton, 1984                 | Indonesia         | 0 |
| Psocidus relativus (Banks, 1920)              | Singapore         | 0 |

|                                              |               |   |
|----------------------------------------------|---------------|---|
| Psocidus salai (Navas, 1934)                 | India         | 0 |
| Psocidus sauteri (Enderlein, 1908)           | Taiwan; China | 0 |
| Psocidus schmidtii (Navas, 1927)             | Costa Rica    | 1 |
| Psocidus segmentatus Endang & Thornton, 1992 | Indonesia     | 0 |
| Psocidus signifer (Navas, 1934)              | India         | 0 |
| Psocidus similis (Banks, 1920)               | Singapore     | 0 |
| Psocidus simplex (Enderlein, 1903)           | Brazil        | 1 |
| Psocidus tacaoensis (Enderlein, 1908)        | Taiwan; China | 0 |
| Psocidus tergatus Endang & Thornton, 1992    | Indonesia     | 0 |
| Psocidus ternatus Li, 1992                   | China         | 0 |
| Psocidus venustus (Navas, 1932)              | Argentina     | 1 |
| Psocidus viscayanus (Banks, 1920)            | Philippines   | 0 |
| Psocidus vitalisi (Navas, 1922)              | Vietnam       | 0 |
| Psocidus zikani (Navas, 1934)                | Brazil        | 1 |
| Psococerastis albimaculata Li & Yang, 1988   | China         | 0 |
| Psococerastis amazonica New, 1980            | Brazil        | 1 |
| Psococerastis ampullaris Li, 1992            | China         | 0 |
| Psococerastis annae Thornton, 1984           | Indonesia     | 0 |
| Psococerastis asiatica Datta, 1966           | India         | 0 |

---

|                                                  |                                                                    |   |
|--------------------------------------------------|--------------------------------------------------------------------|---|
| Psococerastis assamensis Datta, 1966             | India                                                              | 0 |
| Psococerastis baishanzuica Li, 1995              | China                                                              | 0 |
| Psococerastis bakeri (Banks, 1913)               | Philippines                                                        | 0 |
| Psococerastis bengalensis (Kolbe, 1883)          | India; Malaysia; Nepal                                             | 0 |
| Psococerastis bomiensis Li & Yang, 1987          | China                                                              | 0 |
| Psococerastis brachypoda Li, 1990                | China                                                              | 0 |
| Psococerastis callangana (Enderlein, 1900)       | Peru; Panama; Brazil                                               | 1 |
| Psococerastis capitata (Okamoto, 1907)           | Taiwan; China                                                      | 0 |
| Psococerastis capitulatis Li, 1995               | China                                                              | 0 |
| Psococerastis chebalingensis Li, 1993            | China                                                              | 0 |
| Psococerastis collessi Smithers & Thornton, 1981 | New Guinea                                                         | 0 |
| Psococerastis cosmoptera (McLachlan, 1866)       | Malaysia; Burma; India; Indonesia;<br>Singapore; Thailand; Vietnam | 0 |
| Psococerastis curvivalvae Li, 1990               | China                                                              | 0 |
| Psococerastis cuspidata Li, 1992                 | China                                                              | 0 |
| Psococerastis dicoccis Li, 1995                  | China                                                              | 0 |
| Psococerastis discalis (Navas, 1920)             | Vietnam                                                            | 0 |
| Psococerastis fasciata Mockford, 1981            | Brazil; Mexico; Panama                                             | 1 |
| Psococerastis ficivorella (Okamoto, 1907)        | Taiwan; China                                                      | 0 |

---

|                                            |               |   |
|--------------------------------------------|---------------|---|
| Psococerastis flavistigma (Kolbe, 1885)    | Indonesia     | 0 |
| Psococerastis fortunae Mockford, 1981      | Panama        | 1 |
| Psococerastis ghesquierei Badonnel, 1949   | Congo; Angola | 0 |
| Psococerastis golfita Mockford, 1981       | Costa Rica    | 1 |
| Psococerastis guizhouensis Li & Yang, 1988 | China         | 0 |
| Psococerastis hageni New, 1972             | Brazil        | 1 |
| Psococerastis hunanensis Li, 1992          | China         | 0 |
| Psococerastis joannisi (Navas, 1934)       | Vietnam       | 0 |
| Psococerastis lassbergi (Williner, 1945)   | Argentina     | 1 |
| Psococerastis linearis Li, 1990            | China         | 0 |
| Psococerastis lombokensis (Navas, 1927)    | Indonesia     | 0 |
| Psococerastis luzonensis (Banks, 1916)     | Philippines   | 0 |
| Psococerastis mali (Okamoto, 1907)         | Japan; Russia | 0 |
| Psococerastis malleata Li & Yang, 1987     | China         | 0 |
| Psococerastis martensi New, 1987           | Nepal         | 0 |
| Psococerastis moganshanensis Li, 1992      | China         | 0 |
| Psococerastis murudensis (Karny, 1925)     | Malaysia      | 0 |
| Psococerastis nepalensis New, 1971         | Nepal         | 0 |
| Psococerastis nigriventris Li, 1997        | China         | 0 |



|                                            |                                                                                                             |   |
|--------------------------------------------|-------------------------------------------------------------------------------------------------------------|---|
| Psococerastis nilae Datta, 1966            | India                                                                                                       | 0 |
| Psococerastis nirvana (Banks, 1914)        | India; Nepal                                                                                                | 0 |
| Psococerastis opulenta (Navas, 1930)       | Costa Rica; Mexico; Nicaragua;<br>Panama; Trinidad; Brazil; Colombia;<br>French Guiana; Suriname; Venezuela | 1 |
| Psococerastis orientalis (Navas, 1931)     | China                                                                                                       | 0 |
| Psococerastis paraguayana (Ribaga, 1908)   | Paraguay                                                                                                    | 1 |
| Psococerastis parallelica Li, 1992         | China                                                                                                       | 0 |
| Psococerastis parasinensis New, 1975       | Singapore                                                                                                   | 0 |
| Psococerastis pelesi Badonnel, 1973        | Angola                                                                                                      | 0 |
| Psococerastis pellucidatis Li & Yang, 1987 | China                                                                                                       | 0 |
| Psococerastis pictiventris (Kolbe, 1883)   | Brazil                                                                                                      | 1 |
| Psococerastis pingtangensis Li, 1990       | China                                                                                                       | 0 |
| Psococerastis platyrhaphis Li, 1990        | China                                                                                                       | 0 |
| Psococerastis polygonalis Li & Yang, 1987  | China                                                                                                       | 0 |
| Psococerastis polystictis Li & Yang, 1987  | China                                                                                                       | 0 |
| Psococerastis pyralina (Kolbe, 1883)       | Brazil                                                                                                      | 1 |
| Psococerastis pyralinella Mockford, 1981   | Colombia                                                                                                    | 1 |
| Psococerastis pyriformis Li, 1995          | China                                                                                                       | 0 |
| Psococerastis quadrisecta Li, 1993         | China                                                                                                       | 0 |

|                                            |                                                                         |   |
|--------------------------------------------|-------------------------------------------------------------------------|---|
| Psococerastis quinidentata Li, 1999        | China                                                                   | 0 |
| Psococerastis rhondae New, 1978            | Bhutan                                                                  | 0 |
| Psococerastis ryukyuensis Tsutsumi, 1964   | Japan                                                                   | 0 |
| Psococerastis sangzhiensis Li, 1992        | China                                                                   | 0 |
| Psococerastis scissilis Li, 1992           | China                                                                   | 0 |
| Psococerastis sinensis Thornton, 1960      | Hong Kong; China; India                                                 | 0 |
| Psococerastis stictica (Banks, 1920)       | Brazil                                                                  | 1 |
| Psococerastis stipularis Li, 1997          | China                                                                   | 0 |
| Psococerastis stulticaulis Li, 1989        | China                                                                   | 0 |
| Psococerastis taprobanes (Hagen, 1858)     | Sri Lanka; Bhutan; China; India;<br>Indonesia; Malaysia; Tibet; Vietnam | 0 |
| Psococerastis thomasseti Pearman, 1934     | South Africa; Congo; Kenya                                              | 0 |
| Psococerastis tibetensis Li & Yang, 1987   | China                                                                   | 0 |
| Psococerastis tokyoensis (Enderlein, 1906) | Japan; China; Taiwan                                                    | 0 |
| Psococerastis trichotoma Li & Yang, 1987   | China                                                                   | 0 |
| Psococerastis trilobata Li & Yang, 1987    | China                                                                   | 0 |
| Psococerastis venigra Li & Yang, 1992      | China                                                                   | 0 |
| Psococerastis venimaculis Li & Yang, 1987  | China                                                                   | 0 |
| Psococerastis yuwan Tsutsumi, 1964         | Japan                                                                   | 0 |

|                                                     |                                                                                                                                                                                                                                                                      |   |
|-----------------------------------------------------|----------------------------------------------------------------------------------------------------------------------------------------------------------------------------------------------------------------------------------------------------------------------|---|
| <i>Psococerastis zambeziana</i> (Badonnel, 1932)    | Mozambique; Angola; Tanzania                                                                                                                                                                                                                                         | 0 |
| <i>Psococerastis zayuensis</i> Li & Yang, 1987      | China                                                                                                                                                                                                                                                                | 0 |
| <i>Psococerastis zhaoi</i> Li, 1999                 | China                                                                                                                                                                                                                                                                | 0 |
| <i>Psocomesites continuatus</i> (Roesler, 1943)     | Brazil                                                                                                                                                                                                                                                               | 1 |
| <i>Psocomesites multidontatus</i> Li, 1995          | China                                                                                                                                                                                                                                                                | 0 |
| <i>Psocomesites spinosus</i> (New & Thornton, 1975) | Ecuador                                                                                                                                                                                                                                                              | 1 |
| <i>Psocus alticolus</i> Banks, 1937                 | Philippines                                                                                                                                                                                                                                                          | 0 |
| <i>Psocus bipunctatus</i> (Linnaeus, 1761)          | Europe; Albania; Austria; Belgium;<br>Czechoslovakia; Denmark; Finland;<br>France; Germany; Great Britain;<br>Greece; Hungary; Italy; Luxembourg;<br>Netherlands; Norway; Poland;<br>Romania; Spain; Sweden;<br>Switzerland; USSR; Yugoslavia;<br>Korea; Mongolia; : | 0 |
| <i>Psocus crosbyi</i> Chapman, 1930                 | USA                                                                                                                                                                                                                                                                  | 0 |
| <i>Psocus cyllarus</i> Banks, 1941                  | Santo Domingo                                                                                                                                                                                                                                                        | 1 |
| <i>Psocus dolorosus</i> Banks, 1937                 | Philippines                                                                                                                                                                                                                                                          | 0 |
| <i>Psocus illotus</i> Banks, 1939                   | Philippines                                                                                                                                                                                                                                                          | 0 |
| <i>Psocus incomptus</i> Banks, 1937                 | Philippines                                                                                                                                                                                                                                                          | 0 |
| <i>Psocus jeanneli</i> Badonnel, 1945               | Morocco                                                                                                                                                                                                                                                              | 0 |
| <i>Psocus lapidarius</i> Badonnel, 1936             | Algeria                                                                                                                                                                                                                                                              | 0 |

---

|                                            |                        |   |
|--------------------------------------------|------------------------|---|
| Psocus leidyi Aaron, 1886                  | USA; Canada; Mexico; : | 1 |
| Psocus omissus Banks, 1939                 | Philippines            | 0 |
| Psocus oneitus Banks, 1941                 | Santo Domingo          | 1 |
| Psocus rizali Banks, 1939                  | Philippines            | 0 |
| Psocus socialis Li, 1997                   | China                  | 0 |
| Psocus vannivalvulus Li, 1995              | China                  | 0 |
| Ptycta aaroni Thornton, 1984               | Hawaii                 | 0 |
| Ptycta anacantha Badonnel, 1967            | Madagascar             | 0 |
| Ptycta angulata Thornton, Lee & Chui, 1972 | Micronesia             | 0 |
| Ptycta angustifrons (Enderlein, 1931)      | Seychelles             | 0 |
| Ptycta apicalis Broadhead & Richards, 1980 | Kenya                  | 0 |
| Ptycta apicantha Thornton, 1984            | Hawaii                 | 0 |
| Ptycta apicanthoides Thornton, 1984        | Hawaii                 | 0 |
| Ptycta arandae Baz, 1990                   | South Africa           | 0 |
| Ptycta aschekei Turner, 1976               | Reunion                | 0 |
| Ptycta australis Schmidt & Thornton, 1993  | Australia              | 0 |
| Ptycta badonneli (Roesler, 1943)           | Mozambique             | 0 |
| Ptycta bebea Thornton, 1981                | Fiji; Tonga            | 0 |
| Ptycta biloba Smithers, 1999               | Tanzania               | 0 |

---

|                                              |                         |   |
|----------------------------------------------|-------------------------|---|
| Ptycta blanci Badonnel, 1976                 | Madagascar              | 0 |
| Ptycta breuschi Smithers & Thornton, 1990    | Melanesian Arcs Islands | 0 |
| Ptycta buettikeri Badonnel, 1982             | Saudi Arabia; Yemen     | 0 |
| Ptycta bulbosa Badonnel, 1969                | Angola                  | 0 |
| Ptycta caboverdensis Meinander, 1966         | Cape Verde Islands      | 0 |
| Ptycta campbelli Schmidt & Thornton, 1993    | Australia               | 0 |
| Ptycta chekei Turner, 1976                   | Reunion                 | 0 |
| Ptycta cogani New, 1977                      | Aldabra Islands         | 0 |
| Ptycta cruciata Badonnel, 1979               | Ivory Coast             | 0 |
| Ptycta curviclava Broadhead & Richards, 1980 | Kenya                   | 0 |
| Ptycta deltoides Li, 1992                    | China                   | 0 |
| Ptycta descarpentriesi Badonnel, 1976        | Madagascar              | 0 |
| Ptycta diacantha Thornton, 1984              | Hawaii                  | 0 |
| Ptycta diadela Thornton, 1984                | Hawaii                  | 0 |
| Ptycta diastema Thornton, 1984               | Hawaii                  | 0 |
| Ptycta dichotoma Broadhead & Richards, 1980  | Tanzania                | 0 |
| Ptycta dicrosa Thornton, 1984                | Hawaii                  | 0 |
| Ptycta disclera Thornton, 1984               | Hawaii                  | 0 |
| Ptycta distinguenda (Perkins, 1899)          | Hawaii                  | 0 |

---

|                                          |           |   |
|------------------------------------------|-----------|---|
| Ptycta drepana Thornton, 1984            | Hawaii    | 0 |
| Ptycta elegantula Li, 1999               | China     | 0 |
| Ptycta elena New & Thornton, 1975        | Ecuador   | 1 |
| Ptycta emarginata New, 1974              | Australia | 0 |
| Ptycta enderleini (Roesler, 1943)        | Australia | 0 |
| Ptycta episcia Thornton, 1984            | Hawaii    | 0 |
| Ptycta flavipalpi Li & Yang, 1987        | China     | 0 |
| Ptycta frayorgensis New & Thornton, 1981 | Chile     | 1 |
| Ptycta frogneri Thornton, 1984           | Hawaii    | 0 |
| Ptycta frontalis Thornton, 1984          | Indonesia | 0 |
| Ptycta furcata Li, 1993                  | China     | 0 |
| Ptycta giffardi Thornton, 1984           | Hawaii    | 0 |
| Ptycta glossoptera New, 1974             | Australia | 0 |
| Ptycta grucheti Turner, 1976             | Reunion   | 0 |
| Ptycta gynegonia Thornton, 1984          | Hawaii    | 0 |
| Ptycta haleakalae (Perkins, 1899)        | Hawaii    | 0 |
| Ptycta hardyi Thornton, 1984             | Hawaii    | 0 |
| Ptycta hawaiiensis Thornton, 1984        | Hawaii    | 0 |
| Ptycta heterogamias (Perkins, 1899)      | Hawaii    | 0 |

---

|                                            |                             |   |
|--------------------------------------------|-----------------------------|---|
| Ptycta hollowayae Smithers, 1984           | Australia                   | 0 |
| Ptycta iaoensis Thornton, 1984             | Hawaii                      | 0 |
| Ptycta improcera New, 1974                 | Australia                   | 0 |
| Ptycta incurvata Thornton, 1960            | Hong Kong; China; Indonesia | 0 |
| Ptycta isabelae Smithers & Thornton, 1990  | Solomon Islands             | 0 |
| Ptycta kaala Thornton, 1984                | Hawaii                      | 0 |
| Ptycta kauaiensis (Perkins, 1899)          | Hawaii                      | 0 |
| Ptycta kenyensis New, 1975                 | Kenya                       | 0 |
| Ptycta kiboschoensis (Enderlein, 1907)     | Tanzania                    | 0 |
| Ptycta Krakatau Cole, New & Thornton, 1989 | Indonesia                   | 0 |
| Ptycta laevidorsum (Enderlein, 1931)       | Seychelles                  | 0 |
| Ptycta lanaiensis (Perkins, 1899)          | Hawaii                      | 0 |
| Ptycta lemniscata (Smithers, 1964)         | Madagascar                  | 0 |
| Ptycta leucothorax Thornton, 1984          | Hawaii                      | 0 |
| Ptycta lineata Mockford, 1974              | Cuba; USA; Jamaica; Mexico  | 1 |
| Ptycta lobata (Badonnel, 1955)             | Angola                      | 0 |
| Ptycta lobophora Thornton, 1984            | Hawaii                      | 0 |
| Ptycta longicaulis Li, 1992                | China                       | 0 |
| Ptycta longipennis Smithers, 1984          | Australia                   | 0 |

---

|                                                 |                 |   |
|-------------------------------------------------|-----------------|---|
| Ptycta longispinosa (Smithers, 1964)            | Madagascar      | 0 |
| Ptycta lunulata New, 1972                       | Brazil          | 1 |
| Ptycta maculifrons Thornton, 1984               | Hawaii          | 0 |
| Ptycta maculosa Badonnel, 1967                  | Madagascar      | 0 |
| Ptycta marta Thornton & Woo, 1973               | Galapagos       | 0 |
| Ptycta microctena Thornton, 1984                | Hawaii          | 0 |
| Ptycta microglena Thornton, 1984                | Hawaii          | 0 |
| Ptycta micromaculata Thornton, Lee & Chui, 1972 | Japan           | 0 |
| Ptycta molokaiensis (Perkins, 1899)             | Hawaii          | 0 |
| Ptycta monticola (Perkins, 1899)                | Hawaii          | 0 |
| Ptycta muogamarra Smithers, 1977                | Australia       | 0 |
| Ptycta nadleri Galil, 1981                      | Israel          | 0 |
| Ptycta oahuensis (Perkins, 1899)                | Hawaii          | 0 |
| Ptycta obscura Broadhead & Richards, 1980       | Kenya           | 0 |
| Ptycta oceanica New, 1977                       | Aldabra Islands | 0 |
| Ptycta oligocantha Thornton, 1984               | Hawaii          | 0 |
| Ptycta palikea Thornton, 1984                   | Hawaii          | 0 |
| Ptycta pallida Badonnel, 1967                   | Madagascar      | 0 |
| Ptycta paralobata New, 1975                     | Kenya           | 0 |

---



---

|                                        |                     |   |
|----------------------------------------|---------------------|---|
| Ptycta pardena Thornton, 1984          | Hawaii              | 0 |
| Ptycta parvidentata Tsutsumi, 1964     | Japan               | 0 |
| Ptycta pauliani Badonnel, 1967         | Madagascar          | 0 |
| Ptycta pearmani New, 1972              | Brazil              | 1 |
| Ptycta pedina Thornton, 1984           | Hawaii              | 0 |
| Ptycta peleae Thornton, 1984           | Hawaii              | 0 |
| Ptycta perkinsi Thornton, 1984         | Hawaii              | 0 |
| Ptycta persimilis Thornton, 1984       | Hawaii              | 0 |
| Ptycta picta New, 1974                 | Australia           | 0 |
| Ptycta pikeloi Thornton, 1984          | Hawaii              | 0 |
| Ptycta placophora Thornton, 1984       | Hawaii              | 0 |
| Ptycta polluta (Walsh, 1862)           | USA; Canada; Mexico | 1 |
| Ptycta polyacantha Badonnel, 1967      | Madagascar          | 0 |
| Ptycta precincta Thornton, 1984        | Indonesia           | 0 |
| Ptycta prosta Schmidt & Thornton, 1993 | Australia           | 0 |
| Ptycta pulchra Turner, 1976            | Mauritius           | 0 |
| Ptycta pupukea Thornton, 1984          | Hawaii              | 0 |
| Ptycta quadrimaculata (Smithers, 1964) | Madagascar          | 0 |
| Ptycta reticulata New, 1972            | Brazil              | 1 |

---

---

|                                         |                           |   |
|-----------------------------------------|---------------------------|---|
| Ptycta rhina Thornton, 1984             | Hawaii                    | 0 |
| Ptycta sardjani Endang & Thornton, 1992 | Indonesia                 | 0 |
| Ptycta schillei (Enderlein, 1906)       | Indonesia                 | 0 |
| Ptycta schisma Thornton, 1984           | Hawaii                    | 0 |
| Ptycta schneideri Badonnel, 1981        | India                     | 0 |
| Ptycta seyrigi (Badonnel, 1935)         | Madagascar                | 0 |
| Ptycta simulator (Perkins, 1899)        | Hawaii                    | 0 |
| Ptycta stena Thornton, 1984             | Hawaii                    | 0 |
| Ptycta stenomedia Thornton, 1984        | Hawaii                    | 0 |
| Ptycta striatoptera New, 1975           | Kenya                     | 0 |
| Ptycta swezeyi Thornton, 1984           | Hawaii                    | 0 |
| Ptycta sylvestris (Perkins, 1899)       | Hawaii                    | 0 |
| Ptycta tachardiae Badonnel, 1967        | Madagascar                | 0 |
| Ptycta telma Thornton, 1984             | Hawaii                    | 0 |
| Ptycta tikala (Mockford, 1957)          | Guatemala; Mexico; Panama | 1 |
| Ptycta trullifera Smithers, 1998        | Australia                 | 0 |
| Ptycta tsutsumii New & Thornton, 1976   | Malaysia                  | 0 |
| Ptycta umbrata New, 1974                | Australia                 | 0 |
| Ptycta unica (Perkins, 1899)            | Hawaii                    | 0 |

---

|                                                        |                             |   |
|--------------------------------------------------------|-----------------------------|---|
| <i>Ptycta vaga</i> New, 1975                           | Kenya                       | 0 |
| <i>Ptycta verticalis</i> Vaughan, Thornton & New, 1991 | Indonesia                   | 0 |
| <i>Ptycta vittipennis</i> (Perkins, 1899)              | Hawaii                      | 0 |
| <i>Ptycta williamsorum</i> Smithers, 1997              | Australia                   | 0 |
| <i>Ptycta ypsilon</i> Broadhead & Richards, 1980       | Tanzania; Equatorial Guinea | 0 |
| <i>Ptycta zimmermani</i> Thornton, 1984                | Hawaii                      | 0 |
| <i>Setopsocus magnus</i> Smithers & Thornton, 1981     | New Guinea                  | 0 |
| <i>Steleops barrerae</i> Garcia Aldrete, 1995          | Mexico                      | 1 |
| <i>Steleops elegans</i> (Banks, 1904)                  | USA                         | 0 |
| <i>Steleops lichenatus</i> (Walsh, 1863)               | USA                         | 0 |
| <i>Steleops maculatus</i> New, 1972                    | Brazil                      | 1 |
| <i>Steleops monticola</i> Garcia Aldrete, 1981         | Mexico                      | 1 |
| <i>Steleops ortegae</i> Garcia Aldrete, 1995           | Mexico                      | 1 |
| <i>Steleops pedunculatus</i> (Enderlein, 1910)         | Paraguay; Peru; Brazil      | 1 |
| <i>Steleops pulcher</i> New, 1972                      | Brazil                      | 1 |
| <i>Steleops punctipennis</i> Enderlein, 1910           | Paraguay; Peru              | 1 |
| <i>Steleops purus</i> Mockford, 1996                   | Venezuela                   | 1 |
| <i>Sundapsocus robertsoni</i> Smithers, 1995           | Christmas Island            | 0 |
| <i>Symbiopsocus formosanus</i> (Okamoto, 1907)         | Taiwan; China               | 0 |

|                                               |                                                                             |   |
|-----------------------------------------------|-----------------------------------------------------------------------------|---|
| Symbiopsocus leptocladus Li, 1997             | China                                                                       | 0 |
| Symbiopsocus nanyuensis (Li, 1992)            | China                                                                       | 0 |
| Symbiopsocus ophiocephais (Li, 1995)          | China                                                                       | 0 |
| Trichadenotecnum angolense Badonnel, 1955     | Angola                                                                      | 0 |
| Trichadenotecnum baishanzuicum Li, 1995       | China                                                                       | 0 |
| Trichadenotecnum bidentatum Thornton, 1984    | Indonesia                                                                   | 0 |
| Trichadenotecnum bucciniforme Li, 1993        | China                                                                       | 0 |
| Trichadenotecnum chinense Li, 1997            | China                                                                       | 0 |
| Trichadenotecnum circulare (Hagen, 1859)      | Sri Lanka; Indochina                                                        | 0 |
| Trichadenotecnum colesae Turner & Cheke, 1983 | Togo                                                                        | 0 |
| Trichadenotecnum gallicum Lienhard, 1986      | France; Spain                                                               | 0 |
| Trichadenotecnum germanicum Roesler, 1939     | Germany; Czechoslovakia; Finland;<br>Poland; Switzerland; USSR;<br>Mongolia | 0 |
| Trichadenotecnum guandongicum Li, 1993        | China                                                                       | 0 |
| Trichadenotecnum gutianum Li, 1995            | China                                                                       | 0 |
| Trichadenotecnum himalayense Li & Yang, 1987  | China                                                                       | 0 |
| Trichadenotecnum imperatorium Li, 1989        | China                                                                       | 0 |
| Trichadenotecnum maroccanum Baz, 1989         | Morocco                                                                     | 0 |
| Trichadenotecnum mclachlani New, 1973         | Thailand                                                                    | 0 |

|                                                          |                           |   |
|----------------------------------------------------------|---------------------------|---|
| Trichadenotecnum minisexmaculatum Li & Yang, 1987        | China                     | 0 |
| Trichadenotecnum minutum Enderlein, 1926                 | Indonesia                 | 0 |
| Trichadenotecnum nebulosum Vaughan, Thornton & New, 1991 | Indonesia                 | 0 |
| Trichadenotecnum obsitum (Enderlein, 1908)               | Taiwan; China             | 0 |
| Trichadenotecnum opiparipardale (Li, 1995)               | China                     | 0 |
| Trichadenotecnum pardoides Badonnel, 1955                | Angola; Nigeria; Tanzania | 0 |
| Trichadenotecnum pichincha New & Thornton, 1975          | Ecuador                   | 1 |
| Trichadenotecnum pictipenne Badonnel, 1973               | Angola                    | 0 |
| Trichadenotecnum pokhariense New, 1983                   | Nepal                     | 0 |
| Trichadenotecnum rectangulum Li, 1992                    | China                     | 0 |
| Trichadenotecnum resupinum (Li, 1997)                    | China                     | 0 |
| Trichadenotecnum scoparium (Li, 1995)                    | China                     | 0 |
| Trichadenotecnum scrobiculare Li, 1992                   | China                     | 0 |
| Trichadenotecnum spuristipiatum Li, 1997                 | China                     | 0 |
| Trichadenotecnum stipiatum Li, 1992                      | China                     | 0 |
| Trichadenotecnum sufflatum Li, 1993                      | China                     | 0 |
| Trichadenotecnum sylvaticum Turner, 1975                 | Jamaica                   | 0 |
| Trichadenotecnum tenuispinum Li, 1995                    | China                     | 0 |
| Trichadenotecnum thorntoni New, 1975                     | Kenya; Tanzania           | 0 |

|                                          |       |   |
|------------------------------------------|-------|---|
| Trichadenotecnum trigonophyllum Li, 1993 | China | 0 |
| Trichadenotecnum uncorne (Li, 1995)      | China | 0 |
| Trichadenotecnum wuxiacum Li, 1997       | China | 0 |

**Table S2.** Primers used to amplify the three gene regions used in this study. We indicate the forward and reverse sequence for each primer. We present the amplification protocol under each of these regions in Table S3.

| Gene region | Forward                 | Reverse             | Reference                                               |
|-------------|-------------------------|---------------------|---------------------------------------------------------|
| COI         | L6625 [5' CCG GAT CCT   | H7005 [5' CCG GAT   | Hafner et al.<br>(1994)                                 |
|             | TYT GRT TYT TYG GNC     | CCA CAN CRT ART     |                                                         |
|             | AYC C 3']               | ANG TRT CRT G 3']   |                                                         |
| 18S         | Ns1 [5' (5' GTA GTC ATA | Ns2p [5' CGC GGC    | Barker et al.<br>(2003) and<br>Johnson et al.<br>(2004) |
|             | TGC TTG TCT C 3']       | TGC TGG CAC CAG     |                                                         |
|             |                         | ACT TTT CC 3']      |                                                         |
| H3          | [5' ATG GCT CGT ACC     | [5' ATA TCC TTR GGC | Colgan et al.<br>(1998)                                 |
|             | AAG CAG ACV GC 3']      | ATR ATR GTG AC 3']  |                                                         |

**Table S3.** Summary of the protocol used to amplify for each gene region. We indicate the temperature and duration of each stage. We indicate the number of cycles when there are more than 1. In table, s= seconds; m=minutes; Cy=Cycles; Inc=Incubation.

| Gene region | Stage 1   | Stage 2            | Stage 3    | Stage 4    | Stage 5     | Stage 6    |
|-------------|-----------|--------------------|------------|------------|-------------|------------|
| COI         | 94°C (3m) | 41Cy–94°C<br>(30s) | 45°C (45s) | 72°C (60s) | 18°C ( Inc) | -          |
| 18S         | 94°C (2m) | 40Cy–94°C<br>(30)  | 46°C (30s) | 72°C (30s) | 72°C (7m)   | 18°C (Inc) |
| H3          | 94°C (2m) | 42Cy–94°C<br>(20s) | 54°C (30s) | 72°C (1m)  | 72°C (5m)   | 18°C (Inc) |



**Table S4.** Molecular sampling and geographical distribution of the specimens examined in this study. We summarize the taxonomic information for each species, along with information on whether its distribution includes Neotropical areas or not (column=Neo). Samples obtained in this study are indicated on the bottom of the table. Each of these samples is labeled with a code corresponding to the individual number deposited in the Psocopteran collection of the Universidad del Valle, Colombia (Grupo de Investigaciones Entomológicas). Note that figures for the examined taxa are provided in Appendix E.

| Subfamily        | Species                        | Neo | 12S          | 16S          | 18S          | COI          | H3           | wnt          |
|------------------|--------------------------------|-----|--------------|--------------|--------------|--------------|--------------|--------------|
| Amphigerontiinae | <i>Amphigerontia jezoensis</i> | No  | EF66223<br>3 | EF66210<br>4 | AY63054<br>6 | EF66206<br>7 | EF66214<br>3 | GU56936<br>8 |
|                  | <i>Blastopsocus lithinus</i>   | No  | AY27531<br>3 | AY27536<br>3 | AY63054<br>8 | AY27528<br>8 | -            | -            |
|                  | <i>Blaste quieta</i>           | No  | -            | EF66210<br>6 | AY63054<br>7 | EF66206<br>9 | EF66214<br>5 | -            |
| Kaindipsocinae   | <i>Kaindipsocus sp. 2</i>      | No  | KF65195<br>0 | KF49926<br>4 | -            | KF65183<br>1 | -            | KF65171<br>2 |
|                  | <i>Kaindipsocus sp. 3</i>      | No  | JF820376     | -            | -            | -            | JF820386     | -            |
|                  | <i>Kaindipsocus sp. 1</i>      | No  | EF66223<br>6 | EF66210<br>9 | EF66226<br>9 | EF66207<br>2 | EF66214<br>9 | EF66219<br>4 |

|          |                                              |    |              |              |              |              |              |              |
|----------|----------------------------------------------|----|--------------|--------------|--------------|--------------|--------------|--------------|
| Psocinae | <i>Kimunpsocus takumai</i>                   | No | GQ23153<br>6 | GQ23153<br>5 | GQ23153<br>8 | GQ23153<br>7 | -            | -            |
|          | <i>Tanystigma sp. 2</i>                      | No | JF820379     | JF820382     | -            | JF820374     | -            | JF820384     |
|          | <i>Tanystigma sp. 1</i>                      | No | -            | -            | -            | JF820375     | -            | JF820385     |
|          | <i>Metylophorus novaescotiae</i>             | No | AY27531<br>1 | AY27536<br>1 | AY63055<br>8 | -            | -            | -            |
|          | <i>Metylophorus purus</i>                    | No | EF66224<br>1 | EF66211<br>4 | EF66227<br>2 | -            | EF66215<br>5 | EF66220<br>0 |
|          | <i>Atrichadenotecnum<br/>quadripunctatum</i> | No | AY37462<br>2 | AY37457<br>2 | AY37458<br>8 | AY37455<br>5 | EF66215<br>7 | EF66220<br>3 |
|          | <i>Atropsocus atratus</i>                    | No | EF66224<br>4 | EF66211<br>7 | EF66227<br>4 | EF66208<br>0 | EF66215<br>8 | EF66220<br>4 |
|          | <i>Hyalopsocus floridanus</i>                | No | EF66224<br>6 | EF66211<br>9 | EF66227<br>6 | EF66208<br>2 | EF66216<br>0 | EF66220<br>6 |
|          | <i>Hyalopsocus morio</i>                     | No | EF66224<br>5 | EF66211<br>8 | EF66227<br>5 | EF66208<br>1 | EF66215<br>9 | EF66220<br>5 |
|          | <i>Psocus bipunctatus</i>                    | No | EF66224<br>8 | EF66212<br>1 | -            | EF66208<br>4 | EF66216<br>2 | EF66220<br>8 |
|          | <i>Psocus crosbyi</i>                        | No | EF66224<br>9 | EF66212<br>2 | EF66227<br>8 | EF66208<br>5 | EF66216<br>3 | EF66220<br>9 |

|                                 |    |              |              |              |              |              |              |
|---------------------------------|----|--------------|--------------|--------------|--------------|--------------|--------------|
| <i>Atlantopsocus personatus</i> | No | EF66225<br>0 | EF66212<br>3 | EF66227<br>9 | -            | EF66216<br>4 | -            |
| <i>Camelopsocus monticolus</i>  | No | -            | EF66212<br>4 | EF66228<br>0 | EF66208<br>6 | EF66216<br>5 | EF66221<br>0 |
| <i>Copostigma collinum</i>      | No | KF65189<br>7 | KF49921<br>1 | -            | KF65177<br>8 | -            | KF65165<br>9 |
| <i>Copostigma dispersum</i>     | No | KF65189<br>8 | KF49921<br>2 | -            | KF65177<br>9 | -            | KF65166<br>0 |
| <i>Copostigma marosticum</i>    | No | KF65183<br>3 | KF49914<br>7 | -            | KF65171<br>4 | -            | KF65159<br>5 |
| <i>Copostigma natewa</i>        | No | KF65183<br>4 | KF49914<br>8 | -            | KF65171<br>5 | -            | -            |
| <i>Indiopsocus bisignatus</i>   | No | EF66225<br>2 | EF66212<br>6 | EF66228<br>2 | EF66208<br>7 | EF66216<br>7 | -            |
| <i>Loensia conspersa</i>        | No | EF66225<br>4 | EF66212<br>8 | EF66228<br>4 | -            | EF66217<br>1 | EF66221<br>6 |
| <i>Loensia moesta</i>           | No | AY27531<br>0 | AY27536<br>0 | AY63055<br>0 | AY27528<br>5 | EF66216<br>9 | EF66221<br>4 |
| <i>Loensia variegata</i>        | No | AY13990<br>6 | AY13995<br>3 | AY63054<br>9 | AY37455<br>6 | EF66217<br>0 | GU56936<br>9 |
| <i>Oreopsocus buholzeri</i>     | No | EF66225<br>5 | EF66212<br>9 | EF66228<br>5 | -            | EF66217<br>2 | -            |

---

|                            |    |              |              |              |              |              |              |
|----------------------------|----|--------------|--------------|--------------|--------------|--------------|--------------|
| <i>Ptycta aaroni</i>       | No | KF65183<br>7 | KF49915<br>1 | -            | KF65171<br>8 | -            | KF65159<br>9 |
| <i>Ptycta apicantha</i>    | No | KF65185<br>8 | KF49922<br>3 | LC20904<br>2 | KF65173<br>9 | LC20907<br>2 | KF65162<br>0 |
| <i>Ptycta diadela</i>      | No | KF65185<br>3 | KF49916<br>7 | LC20904<br>8 | KF65182<br>3 | LC20907<br>8 | KF65161<br>5 |
| <i>Ptycta diastema</i>     | No | KF65184<br>5 | KF49915<br>9 | LC20905<br>8 | KF65172<br>6 | LC20908<br>8 | KF65160<br>7 |
| <i>Ptycta distinguenda</i> | No | KF65186<br>1 | KF49917<br>5 | -            | -            | -            | KF65162<br>3 |
| <i>Ptycta frogneri</i>     | No | KF65191<br>3 | KF49923<br>1 | -            | KF65179<br>4 | -            | KF65167<br>5 |
| <i>Ptycta giffardi</i>     | No | KF65184<br>6 | KF49916<br>0 | -            | KF65177<br>0 | -            | KF65165<br>1 |
| <i>Ptycta haleakalae</i>   | No | KF65188<br>4 | KF49919<br>8 | -            | KF65176<br>5 | -            | KF65164<br>6 |
| <i>Ptycta hardyi</i>       | No | KF65186<br>3 | KF49917<br>7 | LC20904<br>4 | KF65174<br>4 | LC20907<br>4 | KF65162<br>5 |
| <i>Ptycta johnsoni</i>     | No | KF65189<br>9 | KF49921<br>3 | -            | KF65178<br>0 | EF66217<br>5 | KF65166<br>1 |
| <i>Ptycta kauaiensis</i>   | No | KF65189<br>1 | KF49920<br>5 | -            | KF65177<br>5 | -            | KF65165<br>3 |

---

---

|                            |    |              |              |              |              |              |              |
|----------------------------|----|--------------|--------------|--------------|--------------|--------------|--------------|
| <i>Ptycta leucothorax</i>  | No | KF65187<br>2 | KF49918<br>6 | -            | KF65175<br>9 | -            | KF65163<br>4 |
| <i>Ptycta lobophora</i>    | No | KF65187<br>6 | KF49919<br>0 | -            | KF65179<br>6 | -            | KF65163<br>8 |
| <i>Ptycta maculifrons</i>  | No | KF65186<br>0 | KF49917<br>4 | LC20904<br>3 | KF65178<br>6 | LC20907<br>3 | KF65162<br>2 |
| <i>Ptycta microctena</i>   | No | KF65184<br>2 | KF49915<br>6 | -            | KF65172<br>3 | -            | KF65160<br>4 |
| <i>Ptycta microglena</i>   | No | KF65188<br>3 | KF49919<br>7 | -            | KF65176<br>4 | -            | KF65164<br>5 |
| <i>Ptycta molokaiensis</i> | No | KF65185<br>1 | KF49916<br>5 | LC20904<br>1 | KF65173<br>2 | LC20907<br>1 | KF65161<br>3 |
| <i>Ptycta monticola</i>    | No | KF65188<br>7 | KF49920<br>1 | LC20905<br>3 | KF65177<br>3 | LC20908<br>3 | KF65164<br>9 |
| <i>Ptycta palikea</i>      | No | KF65189<br>5 | KF49920<br>9 | LC20905<br>5 | KF65177<br>6 | LC20908<br>5 | KF65165<br>7 |
| <i>Ptycta pikeloi</i>      | No | KF65184<br>9 | KF49916<br>3 | LC20904<br>0 | KF65173<br>0 | LC20907<br>0 | KF65161<br>1 |
| <i>Ptycta placophora</i>   | No | KF65183<br>9 | KF49915<br>3 | LC20905<br>0 | KF65172<br>5 | LC20908<br>0 | KF65160<br>1 |
| <i>Ptycta simulator</i>    | No | KF65188<br>0 | KF49915<br>7 | LC20904<br>5 | KF65172<br>4 | LC20907<br>5 | KF65160<br>5 |

---

|                                     |     |              |              |              |              |              |              |
|-------------------------------------|-----|--------------|--------------|--------------|--------------|--------------|--------------|
| <i>Ptycta stenomedia</i>            | No  | KF65190<br>2 | KF49921<br>6 | -            | KF65178<br>3 | -            | KF65166<br>4 |
| <i>Ptycta telma</i>                 | No  | KF65189<br>3 | KF49920<br>7 | LC20905<br>4 | KF65181<br>1 | LC20908<br>4 | KF65165<br>5 |
| <i>Ptycta zimmermani</i>            | No  | KF65192<br>5 | KF49923<br>9 | -            | KF65181<br>2 | -            | KF65168<br>7 |
| <i>Steleops elegans</i>             | No  | EF66225<br>9 | EF66213<br>3 | EF66229<br>0 | EF66209<br>5 | EF66217<br>6 | EF66222<br>1 |
| <i>Symbiopsocus hastatus</i>        | No  | -            | -            | EF66229<br>2 | -            | EF66217<br>8 | EF66222<br>3 |
| <i>Trichadenotecnum album</i>       | No  | AY37463<br>7 | AY37458<br>7 | AY37460<br>4 | AY37457<br>1 | LC05216<br>9 | -            |
| <i>Trichadenotecnum alexanderae</i> | No  | -            | -            | -            | -            | LC05217<br>1 | -            |
| <i>Trichadenotecnum amamiense</i>   | No  | LC05194<br>6 | LC05200<br>3 | LC05206<br>1 | LC05210<br>9 | LC05216<br>0 | -            |
| <i>Trichadenotecnum arciforme</i>   | No  | -            | LC05201<br>0 | LC05206<br>9 | -            | LC05217<br>4 | -            |
| <i>Trichadenotecnum castum</i>      | No  | AY37462<br>4 | AY37457<br>4 | AY37459<br>1 | AY37455<br>8 | LC05217<br>2 | -            |
| <i>Trichadenotecnum chiapense</i>   | Yes | LC20897<br>6 | LC20899<br>6 | LC20903<br>7 | -            | -            | -            |

|                                        |    |              |              |              |              |              |              |
|----------------------------------------|----|--------------|--------------|--------------|--------------|--------------|--------------|
| <i>Trichadenotecnum cinnamomum</i>     | No | LC05192<br>0 | LC05197<br>7 | LC05203<br>5 | LC05209<br>1 | LC05213<br>2 | -            |
| <i>Trichadenotecnum circularoides</i>  | No | AY37462<br>3 | AY37457<br>3 | EF66229<br>5 | AY37455<br>7 | EF66218<br>0 | EF66222<br>4 |
| <i>Trichadenotecnum corniculum</i>     | No | AY37462<br>6 | AY37457<br>6 | AY37459<br>3 | AY37456<br>0 | LC05213<br>1 | -            |
| <i>Trichadenotecnum cornutum</i>       | No | LC05196<br>2 | LC05202<br>0 | LC05207<br>9 | LC05211<br>9 | LC05218<br>5 | -            |
| <i>Trichadenotecnum danieli</i>        | No | LC05193<br>5 | LC05199<br>2 | LC05205<br>0 | LC05210<br>1 | LC05214<br>8 | -            |
| <i>Trichadenotecnum depitarensense</i> | No | LC05196<br>9 | LC05202<br>7 | LC05208<br>6 | LC05212<br>3 | LC05219<br>1 | -            |
| <i>Trichadenotecnum desolatum</i>      | No | EF66226<br>3 | EF66213<br>7 | EF66229<br>7 | EF66209<br>9 | EF66218<br>2 | EF66222<br>7 |
| <i>Trichadenotecnum dobhanense</i>     | No | LC05193<br>6 | LC05199<br>3 | LC05205<br>1 | LC05210<br>2 | LC05214<br>9 | -            |
| <i>Trichadenotecnum falx</i>           | No | AY37462<br>8 | AY37457<br>8 | AY37459<br>5 | AY37456<br>2 | LC05214<br>7 | -            |
| <i>Trichadenotecnum furcilingum</i>    | No | AY37462<br>7 | AY37457<br>7 | AY37459<br>4 | AY37456<br>1 | LC05213<br>6 | -            |
| <i>Trichadenotecnum fuscipenne</i>     | No | AY37462<br>9 | AY37457<br>9 | AY37459<br>6 | AY37456<br>3 | LC05215<br>2 | -            |

|                                      |    |              |              |              |              |              |   |
|--------------------------------------|----|--------------|--------------|--------------|--------------|--------------|---|
| <i>Trichadenotecnum germanicum</i>   | No | LC05195<br>2 | LC05200<br>9 | LC05206<br>8 | LC05211<br>5 | LC05217<br>3 | - |
| <i>Trichadenotecnum incognitum</i>   | No | AY37463<br>6 | AY37458<br>6 | AY37460<br>3 | AY37457<br>0 | LC05217<br>0 | - |
| <i>Trichadenotecnum isseii</i>       | No | LC05192<br>4 | LC05198<br>1 | LC05203<br>9 | LC05209<br>4 | LC05213<br>7 | - |
| <i>Trichadenotecnum kerinciense</i>  | No | LC05196<br>7 | LC05202<br>5 | LC05208<br>4 | LC05212<br>2 | LC05219<br>0 | - |
| <i>Trichadenotecnum krucilense</i>   | No | LC05194<br>1 | LC05199<br>8 | LC05205<br>6 | LC05210<br>5 | LC05215<br>4 | - |
| <i>Trichadenotecnum kumejimense</i>  | No | LC05194<br>8 | LC05200<br>5 | LC05206<br>3 | LC05211<br>1 | LC05216<br>2 | - |
| <i>Trichadenotecnum latebrachium</i> | No | AY37463<br>4 | AY37458<br>4 | AY37460<br>1 | AY37456<br>8 | LC05216<br>3 | - |
| <i>Trichadenotecnum majus</i>        | No | LC05196<br>6 | LC05202<br>4 | LC05208<br>3 | JF862465     | LC05218<br>9 | - |
| <i>Trichadenotecnum malayense</i>    | No | LC05193<br>4 | LC05199<br>1 | LC05204<br>9 | LC05210<br>0 | LC05214<br>6 | - |
| <i>Trichadenotecnum malickyi</i>     | No | LC05194<br>5 | LC05200<br>2 | LC05206<br>0 | LC05210<br>8 | LC05215<br>8 | - |
| <i>Trichadenotecnum medium</i>       | No | LC05194<br>9 | LC05200<br>6 | LC05206<br>4 | -            | LC05216<br>5 | - |



|                                      |     |              |              |              |              |              |              |
|--------------------------------------|-----|--------------|--------------|--------------|--------------|--------------|--------------|
| <i>Trichadenotecnum mixtum</i>       | No  | AY37463<br>3 | AY37458<br>3 | AY37460<br>0 | AY37456<br>7 | LC05215<br>9 | -            |
| <i>Trichadenotecnum nepalense</i>    | No  | LC05197<br>0 | LC05202<br>8 | LC05208<br>7 | LC05212<br>4 | LC05219<br>2 | -            |
| <i>Trichadenotecnum nothoapertum</i> | No  | AY37463<br>2 | AY37458<br>2 | AY37459<br>9 | AY37456<br>6 | LC05217<br>7 | -            |
| <i>Trichadenotecnum okinawense</i>   | No  | LC05194<br>7 | LC05200<br>4 | LC05206<br>2 | LC05211<br>0 | LC05216<br>1 | -            |
| <i>Trichadenotecnum pseudomedium</i> | No  | LC05195<br>0 | LC05200<br>7 | LC05206<br>5 | LC05211<br>2 | LC05216<br>6 | -            |
| <i>Trichadenotecnum quaesitum</i>    | No  | EF66226<br>2 | EF66213<br>6 | EF66229<br>6 | EF66209<br>8 | EF66218<br>1 | EF66222<br>6 |
| <i>Trichadenotecnum sabahense</i>    | No  | LC05191<br>6 | LC05197<br>3 | LC05203<br>1 | LC05208<br>9 | LC05212<br>7 | -            |
| <i>Trichadenotecnum santosai</i>     | No  | LC05195<br>8 | LC05201<br>6 | LC05207<br>5 | LC05211<br>7 | LC05218<br>1 | -            |
| <i>Trichadenotecnum sclerotum</i>    | No  | LC05192<br>2 | LC05197<br>9 | LC05203<br>7 | LC05209<br>3 | LC05213<br>4 | -            |
| <i>Trichadenotecnum sexpunctatum</i> | No  | LC05195<br>1 | LC05200<br>8 | LC05206<br>7 | LC05211<br>4 | LC05216<br>8 | -            |
| <i>Trichadenotecnum shawi</i>        | Yes | LC20896<br>1 | -            | -            | LC20900<br>0 | LC20906<br>0 | -            |

|                                        |     |              |              |              |              |              |              |
|----------------------------------------|-----|--------------|--------------|--------------|--------------|--------------|--------------|
| <i>Trichadenotecnum sibolangitense</i> | No  | LC05194<br>3 | LC05200<br>0 | LC05205<br>8 | LC05210<br>6 | LC05215<br>6 | -            |
| <i>Trichadenotecnum slossonae</i>      | No  | LC20897<br>5 | LC20899<br>5 | LC20903<br>6 | -            | LC20906<br>8 | -            |
| <i>Trichadenotecnum soenarti</i>       | No  | LC05196<br>1 | LC05201<br>9 | LC05207<br>8 | LC05211<br>8 | LC05218<br>4 | -            |
| <i>Trichadenotecnum suwai</i>          | No  | LC05194<br>0 | LC05199<br>7 | LC05205<br>5 | LC05210<br>4 | LC05215<br>3 | -            |
| <i>Trichadenotecnum tigrinum</i>       | No  | LC05191<br>5 | LC05197<br>2 | LC05203<br>0 | LC05208<br>8 | LC05212<br>5 | -            |
| <i>Trichadenotecnum ufla</i>           | Yes | LC18509<br>2 | LC18509<br>1 | LC18509<br>4 | LC18509<br>3 | LC18509<br>5 | -            |
| <i>Trichadenotecnum yaeyamense</i>     | No  | -            | -            | LC05206<br>6 | LC05211<br>3 | LC05216<br>7 | -            |
| <i>Trichadenotecnum yamatomajus</i>    | No  | AY37463<br>1 | AY37458<br>1 | AY37459<br>8 | AY37456<br>5 | LC05218<br>7 | -            |
| <i>Trichadenotecnum yatai</i>          | No  | LC05193<br>9 | LC05199<br>6 | LC05205<br>4 | -            | LC05215<br>1 | -            |
| <i>Sigmatoneura kakisayap</i>          | No  | EF66223<br>9 | EF66211<br>2 | -            | EF66207<br>6 | GU56931<br>6 | GU56937<br>2 |
| <i>Sigmatoneura kolbei</i>             | No  | EF66224<br>2 | EF66211<br>5 | AY63055<br>6 | EF66207<br>8 | -            | EF66220<br>1 |

|                  |                                            |     |              |              |              |              |              |              |
|------------------|--------------------------------------------|-----|--------------|--------------|--------------|--------------|--------------|--------------|
|                  | <i>Cerastipsocus trifasciatus</i>          | No  | EF66223<br>7 | EF66211<br>0 | EF66227<br>0 | EF66207<br>3 | EF66215<br>0 | EF66219<br>5 |
|                  | <i>Cerastipsocus venosus</i>               | No  | -            | -            | AY25214<br>1 | -            | -            | -            |
|                  | <i>Longivalvus nubilus</i>                 | No  | -            | -            | -            | EF66207<br>5 | EF66215<br>2 | EF66219<br>7 |
|                  | <i>Psococerastis nubila</i>                | No  | AY13990<br>5 | AY13995<br>2 | AY63055<br>9 | -            | -            | -            |
| New sequences    |                                            |     |              |              |              |              |              |              |
| Amphigerontiinae | <i>Psocidae</i> sp. (014)                  | Yes | -            | -            | Submitted    | Submitted    | Submitted    | -            |
|                  | <i>Psocidae</i> sp. (016)                  | Yes | -            | -            | Submitted    | Submitted    | Submitted    | -            |
|                  | <i>Psocidae</i> sp. (015)                  | Yes | -            | -            | Submitted    | Submitted    | Submitted    | -            |
|                  | <i>Psocidae</i> sp. (025; Fig. E13)        | Yes | -            | -            | Submitted    | Submitted    | Submitted    | -            |
|                  | <i>Elaphopsocoides</i> sp. (045; Fig. E11) | Yes | -            | -            | Submitted    | Submitted    | Submitted    | -            |
|                  | <i>Chaetoblaste</i> sp. (044; Fig. E9)     | Yes | -            | -            | Submitted    | Submitted    | Submitted    | -            |
|                  | <i>Blaste</i> sp. (019; Fig. E5)           | Yes | -            | -            | Submitted    | Submitted    | Submitted    | -            |
|                  | <i>Blaste</i> sp. (017)                    | Yes | -            | -            | Submitted    | Submitted    | Submitted    | -            |
|                  | Amphigerontinae sp. (012; Fig. E1)         | Yes | -            | -            | Submitted    | Submitted    | Submitted    | -            |

|          |                                             |     |   |   |           |           |           |   |
|----------|---------------------------------------------|-----|---|---|-----------|-----------|-----------|---|
| Psocinae | <i>Blaste</i> sp. (013; Fig. E2)            | Yes | - | - | Submitted | Submitted | Submitted | - |
|          | <i>Metylophorus</i> sp. (035)               | Yes | - | - | Submitted | Submitted | Submitted | - |
|          | <i>Metylophorus</i> sp. (034; Fig. E12)     | Yes | - | - | Submitted | Submitted | Submitted | - |
|          | <i>Psocus</i> sp. (032; Fig. E16)           | Yes | - | - | Submitted | Submitted | Submitted | - |
|          | <i>Trichadenotecnum</i> sp. (040; Fig. E29) | Yes | - | - | Submitted | Submitted | Submitted | - |
|          | <i>Ptycta</i> sp. (042; Fig. E18)           | Yes | - | - | Submitted | Submitted | Submitted | - |
|          | <i>Steleops</i> sp. (043; Fig. E19)         | Yes | - | - | Submitted | Submitted | Submitted | - |
|          | <i>Trichadenotecnum</i> sp. (008; Fig. E28) | Yes | - | - | Submitted | Submitted | Submitted | - |
|          | <i>Atrichadenotecnum</i> sp. (011; Fig. E3) | Yes | - | - | Submitted | Submitted | Submitted | - |
|          | <i>Trichadenotecnum</i> sp. (006; Fig. E26) | Yes | - | - | Submitted | Submitted | Submitted | - |
|          | <i>Trichadenotecnum</i> sp. (007; Fig. E27) | Yes | - | - | Submitted | Submitted | Submitted | - |
|          | <i>Atrichadenotecnum</i> sp. (030; Fig. E4) | Yes | - | - | Submitted | Submitted | Submitted | - |
|          | <i>Ptycta</i> sp. (038; Fig. E17)           | Yes | - | - | Submitted | Submitted | Submitted | - |
|          | <i>Cerastipsocus</i> sp. (005; Fig. E7)     | Yes | - | - | Submitted | Submitted | Submitted | - |

|                                          |     |   |   |           |           |           |   |
|------------------------------------------|-----|---|---|-----------|-----------|-----------|---|
| <i>Cerastipsocus</i> sp. (018)           | Yes | - | - | Submitted | Submitted | Submitted | - |
| <i>Cerastipsocus</i> sp. (010; Fig. E8)  | Yes | - | - | Submitted | Submitted | Submitted | - |
| <i>Psococerastis</i> sp. (009; Fig. E14) | Yes | - | - | Submitted | Submitted | Submitted | - |
| <i>Psococerastis</i> sp. (039; Fig. E15) | Yes | - | - | Submitted | Submitted | Submitted | - |
| <i>Thyrsopsocus</i> sp. (036; Fig. E25)  | Yes | - | - | Submitted | Submitted | Submitted | - |
| <i>Dactylopsocus</i> sp. (037; Fig. E10) | Yes | - | - | Submitted | Submitted | Submitted | - |
| <i>Psococerastis</i> sp. (033; Fig. E23) | Yes | - | - | Submitted | Submitted | Submitted | - |
| Thyrsophorini sp. (031)                  | Yes | - | - | Submitted | Submitted | Submitted | - |
| <i>Cerastipsocus</i> sp. (003; Fig. E6)  | Yes | - | - | Submitted | Submitted | Submitted | - |
| <i>Thyrsopsocus</i> sp. (020; Fig. E24)  | Yes | - | - | Submitted | Submitted | Submitted | - |
| <i>Cerastipsocus</i> sp. (024)           | Yes | - | - | Submitted | Submitted | Submitted | - |
| Thyrsophorini sp. (022)                  | Yes | - | - | Submitted | Submitted | Submitted | - |
| Thyrsophorini sp. (023; Fig. E22)        | Yes | - | - | Submitted | Submitted | Submitted | - |
| Thyrsophorini sp. (021; Fig. E22)        | Yes | - | - | Submitted | Submitted | Submitted | - |
| Thyrsophorini sp. (029; Fig. E20)        | Yes | - | - | Submitted | Submitted | Submitted | - |

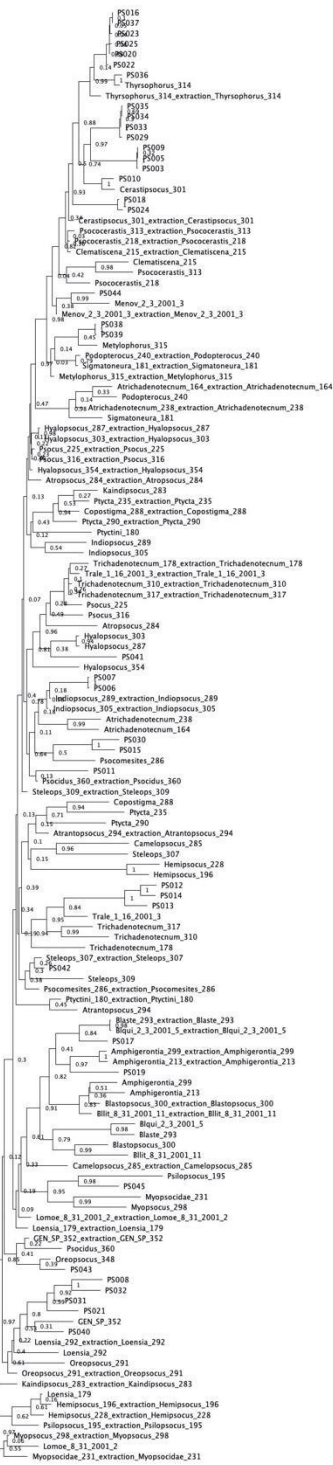

**Figure S1.** Phylogeny of the Psocidae based on combining our newly generated samples with those from Yoshizawa and Johnson (2008). The corresponding tree is presented in the Supplementary File S12.

## References

- Barker, S.C., Whiting, M., Johnson, K.P. & Murrell, A. (2003), “Phylogeny of the lice (Insecta, Phthiraptera) inferred from small subunit rRNA”, *Zoologica Scripta*, 32(5), pp. 407–414.
- Colgan, D.J., McLauchlan, A., Wilson, G.D.F., Livingston, S.P., Edgecombe, G.D., Macaranas, J. & Cassis, G. (1998), “Histone H3 and U2 snRNA DNA sequences and arthropod molecular evolution”, *Australian Journal of Zoology*, 46(5), pp. 419–437.
- Hafner, M.S., P. D. Sudman, F. X. Villablanca, T. A. Spradling, J. W. Demastes & Nadler, S. A. (1994), “Disparate rates of molecular evolution in cospeciating hosts y parasites”, *Science*, 265, pp. 1087 -1090.
- Johnson, K.P., Yoshizawa, K., & Smith, V.S. (2004), “Multiple origins of parasitism in lice”, *Proc. Biol. Sci.*, 271, pp. 1771-1776.
- Ooms J (2014). “The jsonlite Package: A Practical and Consistent Mapping Between JSON Data and R Objects.” [arXiv:1403.2805](https://arxiv.org/abs/1403.2805).
- Solymos, P. (2019). Zawadzki Z. pbapply: Adding Progress Bar to\* apply' functions. R package version 1.4-2.
- Wickham, H. (2019). Zawadzki Z. httr. R package version 1.4.1.
